# Supplementary material for: Secondary metabolome and its defensive role in the aeolidoidean Phyllodesmium longicirrum, (Gastropoda, Heterobranchia, Nudibranchia)
Source: PubMed Central journal article supplement (PMC5372768; doi:10.3762/bjoc.13.50), 2017-03-13
Supplement: Beilstein_J_Org_Chem-13-502-s001.pdf [file Beilstein_J_Org_Chem-13-502-s001.pdf]

## Supporting Information

for

# Secondary metabolome and its defensive role in the aeolidoid *Phyllodesmium longicirrum*, (Gastropoda, Heterobranchia, Nudibranchia)

Alexander Bogdanov<sup>1</sup>, Cora Hertzner<sup>1</sup>, Stefan Kehraus<sup>1</sup>, Samuel Nietzer<sup>2</sup>, Sven Rohde<sup>2</sup>, Peter J. Schupp<sup>2</sup>, Heike Wägele<sup>3</sup>, Gabriele M. König\*<sup>1</sup>

Address: <sup>1</sup>Institute for Pharmaceutical Biology, University of Bonn, Nussallee 6, 53115 Bonn, Germany, <sup>2</sup>Institute for Chemistry and Biology of the Marine Environment (ICBM), Carl-von-Ossietzki University Oldenburg, Schleusenstraße 1, 26382 Wilhelmshaven, Germany and <sup>3</sup>Zoologisches Forschungsmuseum Alexander Koenig, Adenauerallee 160, 53113 Bonn, Germany.

Email: Gabriele M. König - g.koenig@uni-bonn.de

\*Corresponding author

## Spectroscopic data and other relevant information

### TABLE OF CONTENTS

|                                                                                                                                                           |    |
|-----------------------------------------------------------------------------------------------------------------------------------------------------------|----|
| <b>Figure S1.</b> <sup>1</sup> H NMR spectrum of 3β,5α,6β-trihydroxy-9-oxo-9,11-secogorgostan-11-ol ( <b>1</b> ) in MeOH- <i>d</i> <sub>4</sub> .....     | 3  |
| <b>Figure S2.</b> <sup>13</sup> C NMR spectrum of 3β,5α,6β-trihydroxy-9-oxo-9,11-secogorgostan-11-ol ( <b>1</b> ) in MeOH- <i>d</i> <sub>4</sub> .....    | 3  |
| <b>Figure S3.</b> <sup>1</sup> H NMR spectrum of 3β,5α,6β-trihydroxy-9-oxo-9,11-secogorgostan-11-ol ( <b>1</b> ) in pyridine- <i>d</i> <sub>5</sub> ..... | 4  |
| <b>Table S1.</b> NMR data of 3β,5α,6β-trihydroxy-9-oxo-9,11-secogorgostan-11-ol ( <b>1</b> ) in MeOH- <i>d</i> <sub>4</sub> .....                         | 5  |
| <b>Figure S4.</b> UV spectrum of 3β,5α,6β-trihydroxy-9-oxo-9,11-secogorgostan-11-ol ( <b>1</b> ) in MeOH.....                                             | 6  |
| <b>Figure S5.</b> IR spectrum of 3β,5α,6β-trihydroxy-9-oxo-9,11-secogorgostan-11-ol ( <b>1</b> ).....                                                     | 6  |
| <b>Figure S6.</b> <sup>1</sup> H NMR spectrum of steroid <b>2</b> in MeOH- <i>d</i> <sub>4</sub> .....                                                    | 7  |
| <b>Figure S7.</b> <sup>13</sup> C NMR spectrum of steroid <b>2</b> in MeOH- <i>d</i> <sub>4</sub> .....                                                   | 7  |
| <b>Figure S8.</b> <sup>1</sup> H NMR spectrum of steroid <b>3</b> in MeOH- <i>d</i> <sub>4</sub> .....                                                    | 8  |
| <b>Figure S9.</b> <sup>13</sup> C NMR spectrum of steroid <b>3</b> in MeOH- <i>d</i> <sub>4</sub> .....                                                   | 8  |
| <b>Figure S10.</b> <sup>1</sup> H NMR spectrum of steroid <b>4</b> in MeOH- <i>d</i> <sub>4</sub> .....                                                   | 9  |
| <b>Figure S11.</b> <sup>13</sup> C NMR spectrum of steroid <b>4</b> in MeOH- <i>d</i> <sub>4</sub> .....                                                  | 9  |
| <b>Figure S12.</b> <sup>1</sup> H NMR spectrum of 6,13-bisdesoxomethyl sarcoate ( <b>5</b> ) in MeOH- <i>d</i> <sub>4</sub> .....                         | 10 |
| <b>Figure S13.</b> <sup>13</sup> C NMR spectrum of 6,13-bisdesoxomethyl sarcoate ( <b>5</b> ) in MeOH- <i>d</i> <sub>4</sub> .....                        | 10 |
| <b>Table S2.</b> NMR data of 6,13-bisdesoxomethyl sarcoate ( <b>5</b> ) in MeOH- <i>d</i> <sub>4</sub> .....                                              | 11 |
| <b>Figure S14.</b> UV spectrum of 6,13-bisdesoxo-methyl sarcoate ( <b>5</b> ) in MeOH.....                                                                | 12 |
| <b>Figure S15.</b> IR spectrum of 6,13-bisdesoxo-methyl sarcoate ( <b>5</b> ).....                                                                        | 12 |
| <b>Figure S16.</b> <sup>1</sup> H NMR spectrum of sarcophytonin B ( <b>6</b> ) in MeOH- <i>d</i> <sub>4</sub> .....                                       | 13 |
| <b>Figure S17.</b> <sup>13</sup> C NMR spectrum of sarcophytonin B ( <b>6</b> ) in MeOH- <i>d</i> <sub>4</sub> .....                                      | 13 |
| <b>Figure S18.</b> <sup>1</sup> H NMR spectrum of compound <b>7</b> in MeOH- <i>d</i> <sub>4</sub> .....                                                  | 14 |
| <b>Figure S19.</b> <sup>13</sup> C NMR spectrum of compound <b>7</b> in MeOH- <i>d</i> <sub>4</sub> .....                                                 | 14 |
| <b>Figure S20.</b> <sup>1</sup> H NMR spectrum of (2 <i>S</i> )-isosarcophine ( <b>8</b> ) in MeOH- <i>d</i> <sub>4</sub> .....                           | 15 |
| <b>Figure S21.</b> <sup>13</sup> C NMR spectrum of (2 <i>S</i> )-isosarcophine ( <b>8</b> ) in MeOH- <i>d</i> <sub>4</sub> .....                          | 15 |

|                                                                                                                                                                                           |    |
|-------------------------------------------------------------------------------------------------------------------------------------------------------------------------------------------|----|
| <b>Figure S22.</b> ECD spectrum of (2 <i>S</i> )-isosarcophine ( <b>8</b> ) in MeOH .....                                                                                                 | 16 |
| <b>Figure S23.</b> <sup>1</sup> H NMR spectrum of (2 <i>R</i> )-isosarcophine ( <b>9</b> ) in MeOH- <i>d</i> <sub>4</sub> .....                                                           | 17 |
| <b>Figure S24.</b> <sup>13</sup> C NMR spectrum of (2 <i>R</i> )-isosarcophine ( <b>9</b> ) in MeOH- <i>d</i> <sub>4</sub> .....                                                          | 17 |
| <b>Figure S25.</b> UV spectrum of (2 <i>R</i> )-isosarcophine ( <b>9</b> ) .....                                                                                                          | 18 |
| <b>Figure S26.</b> IR spectrum of (2 <i>R</i> )-isosarcophine ( <b>9</b> ) .....                                                                                                          | 18 |
| <b>Figure S27.</b> ECD spectrum of (2 <i>R</i> )-isosarcophine ( <b>9</b> ) in MeOH .....                                                                                                 | 19 |
| <b>Table S3.</b> <sup>1</sup> H and <sup>13</sup> C NMR data of 2 <i>S</i> -isosarcophine ( <b>8</b> ) and 2 <i>R</i> -isosarcophine ( <b>9</b> ) in MeOH- <i>d</i> <sub>4</sub> .....    | 20 |
| <b>Figure S28.</b> <sup>1</sup> H NMR spectrum of (2 <i>S</i> )-isosarcophytoxide ( <b>10</b> ) in MeOH- <i>d</i> <sub>4</sub> .....                                                      | 21 |
| <b>Figure S29.</b> <sup>13</sup> C NMR spectrum of (2 <i>S</i> )-isosarcophytoxide ( <b>10</b> ) in MeOH- <i>d</i> <sub>4</sub> .....                                                     | 21 |
| <b>Figure S30.</b> <sup>1</sup> H NMR spectrum of (2 <i>R</i> )-isosarcophytoxide ( <b>11</b> ) in MeOH- <i>d</i> <sub>4</sub> .....                                                      | 22 |
| <b>Figure S31.</b> <sup>13</sup> C NMR spectrum of (2 <i>R</i> )-isosarcophytoxide ( <b>11</b> ) in MeOH- <i>d</i> <sub>4</sub> .....                                                     | 22 |
| <b>Figure S32.</b> <sup>1</sup> H NMR spectrum of 2 <i>S</i> ,3 <i>R</i> ,4 <i>R</i> ,11 <i>R</i> ,12 <i>R</i> -isosarcophytobisepoxide ( <b>12</b> ) in MeOH- <i>d</i> <sub>4</sub> .... | 23 |
| <b>Figure S33.</b> <sup>13</sup> C NMR spectrum of 2 <i>S</i> ,3 <i>R</i> ,4 <i>R</i> ,11 <i>R</i> ,12 <i>R</i> -isosarcophytobisepoxide ( <b>12</b> ) in MeOH- <i>d</i> <sub>4</sub> ... | 23 |
| <b>Figure S34.</b> IR spectrum of 2 <i>S</i> ,3 <i>R</i> ,4 <i>R</i> ,11 <i>R</i> ,12 <i>R</i> -isosarcophytobisepoxide ( <b>12</b> ) .....                                               | 24 |
| <b>Figure S35.</b> UV spectrum of 2 <i>S</i> ,3 <i>R</i> ,4 <i>R</i> ,11 <i>R</i> ,12 <i>R</i> -isosarcophytobisepoxide ( <b>12</b> ) in MeOH .....                                       | 24 |
| <b>Figure S36.</b> ECD spectrum of 2 <i>S</i> ,3 <i>R</i> ,4 <i>R</i> ,11 <i>R</i> ,12 <i>R</i> -isosarcophytobisepoxide ( <b>12</b> ) in acetonitrile (c<br>0.01 mg/ml) .....            | 25 |
| <b>Table S4.</b> NMR Data of 2 <i>S</i> ,3 <i>R</i> ,4 <i>R</i> ,11 <i>R</i> ,12 <i>R</i> -isosarcophytobisepoxide ( <b>12</b> ) in MeOH- <i>d</i> <sub>4</sub> .....                     | 26 |
| <b>Figure S37.</b> <sup>1</sup> H NMR spectrum of cembranoid ( <b>13</b> ) in MeOH- <i>d</i> <sub>4</sub> .....                                                                           | 27 |
| <b>Figure S38.</b> <sup>13</sup> C NMR spectrum of cembranoid ( <b>13</b> ) in MeOH- <i>d</i> <sub>4</sub> .....                                                                          | 27 |
| <b>Figure S39.</b> <sup>1</sup> H NMR spectrum of isobisglaucumlide B ( <b>14</b> ) in MeOH- <i>d</i> <sub>4</sub> .....                                                                  | 28 |
| <b>Figure S40.</b> <sup>13</sup> C NMR spectrum of isobisglaucumlide B ( <b>14</b> ) in MeOH- <i>d</i> <sub>4</sub> .....                                                                 | 28 |
| <b>Table S5.</b> NMR data of isobisglaucumlide B ( <b>14</b> ) in MeOH- <i>d</i> <sub>4</sub> .....                                                                                       | 29 |
| <b>Figure S41.</b> UV spectrum of isobisglaucumlide B ( <b>14</b> ) in MeOH.....                                                                                                          | 30 |
| <b>Figure S42.</b> IR spectrum of isobisglaucumlide B ( <b>14</b> ) .....                                                                                                                 | 30 |
| <b>Figure S43.</b> <sup>1</sup> H NMR spectrum of isobisglaucumlide C ( <b>15</b> ) in MeOH- <i>d</i> <sub>4</sub> .....                                                                  | 31 |
| <b>Figure S44.</b> <sup>13</sup> C NMR spectrum of isobisglaucumlide C ( <b>15</b> ) in MeOH- <i>d</i> <sub>4</sub> .....                                                                 | 31 |
| <b>Table S6.</b> NMR data of isobisglaucumlide C ( <b>15</b> ) in MeOH- <i>d</i> <sub>4</sub> . .....                                                                                     | 32 |
| <b>Figure S45.</b> UV spectrum of isobisglaucumlide C ( <b>15</b> ) in MeOH.....                                                                                                          | 33 |
| <b>Figure S46.</b> IR spectrum of isobisglaucumlide C ( <b>15</b> ) .....                                                                                                                 | 33 |
| <b>Table S7A.</b> Secondary metabolites of <i>P. longicirrum</i> isolated and identified in the current<br>investigation in correlation with UPLC-HRMS data .....                         | 34 |
| <b>Table S7B.</b> Secondary metabolites reported from various <i>Sarcophyton</i> spp .....                                                                                                | 35 |
| <b>Figure S47.</b> UPLC-HRMS chromatogram of VLC3.....                                                                                                                                    | 37 |
| <b>Figure S48.</b> UPLC-HRMS chromatogram of VLC4.....                                                                                                                                    | 38 |
| <b>Figure S49.</b> UPLC-HRMS chromatogram of VLC5.....                                                                                                                                    | 39 |
| <b>Figure S50.</b> UPLC-HRMS chromatogram of VLC6.....                                                                                                                                    | 40 |
| <b>Figure S51.</b> UPLC-HRMS chromatogram of VLC7.....                                                                                                                                    | 41 |
| <b>Figure S52.</b> UPLC-HRMS chromatogram of VLC8.....                                                                                                                                    | 42 |
| <b>Figure S53.</b> Abundance of 3β,5α,6β-trihydroxy-9-oxo-9,11-secogorgostan-11-ol ( <b>1</b> )<br>( <i>m/z</i> 493.39 M+H) in VLC 7.....                                                 | 43 |
| <b>Figure S54.</b> Abundance of <i>m/z</i> value of 711.39 in the fraction VLC 6.....                                                                                                     | 44 |
| <b>Figure S55.</b> Abundance of <i>m/z</i> value of 711.39 in the fraction VLC 7.....                                                                                                     | 45 |
| <b>Figure S56.</b> Abundance of <i>m/z</i> value of 669.44 in the fraction VLC 7.....                                                                                                     | 46 |
| <b>Figure S57.</b> Preliminary results of feeding deterrence assay. ....                                                                                                                  | 47 |

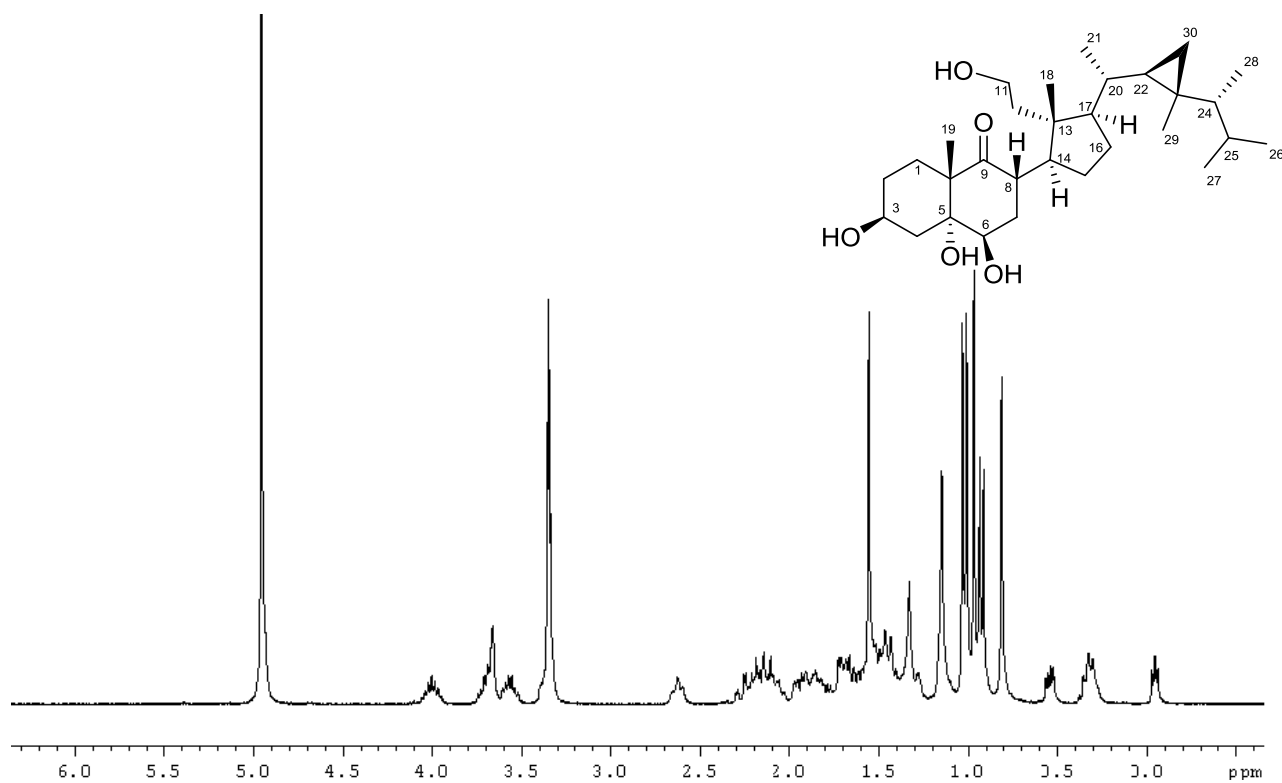

**Figure S1.**  $^1\text{H}$  NMR spectrum of 3 $\beta$ ,5 $\alpha$ ,6 $\beta$ -trihydroxy-9-oxo-9,11-secogorgostan-11-ol (**1**) in  $\text{MeOH-}d_4$

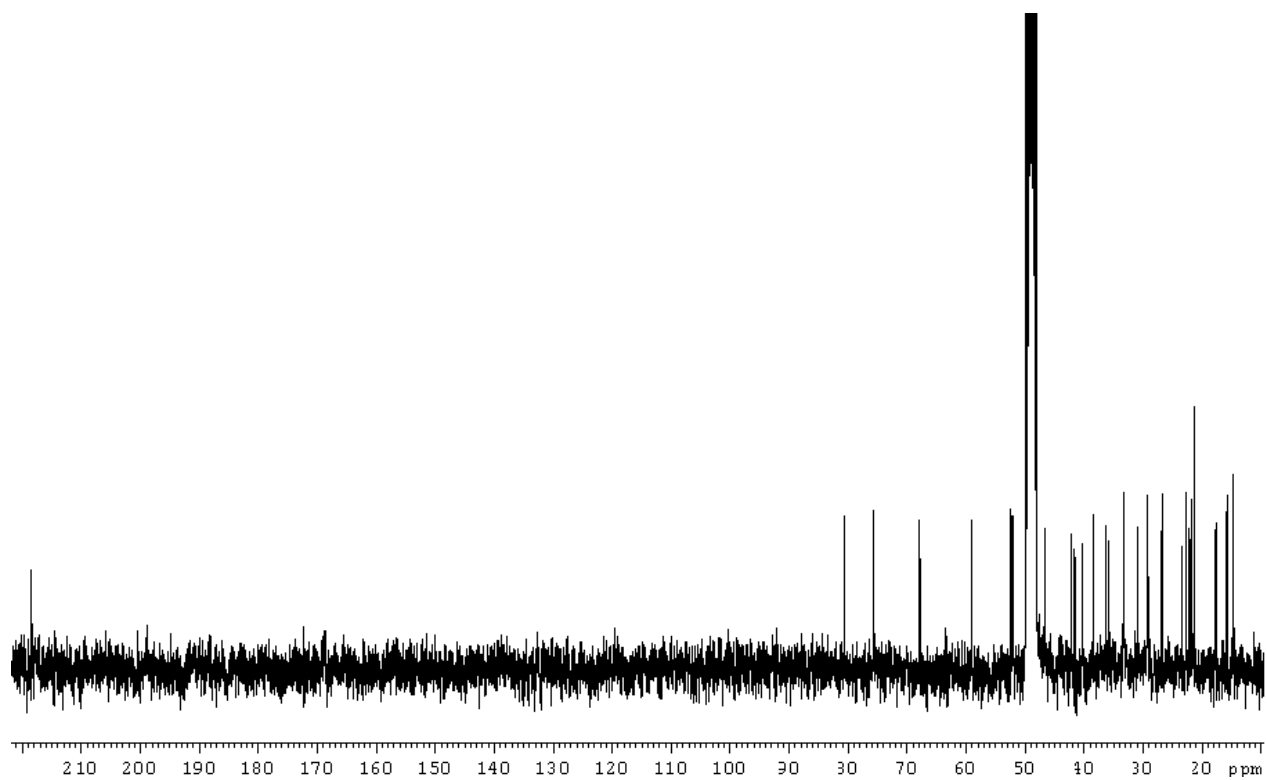

**Figure S2.**  $^{13}\text{C}$  NMR spectrum of 3 $\beta$ ,5 $\alpha$ ,6 $\beta$ -trihydroxy-9-oxo-9,11-secogorgostan-11-ol (**1**) in  $\text{MeOH-}d_4$

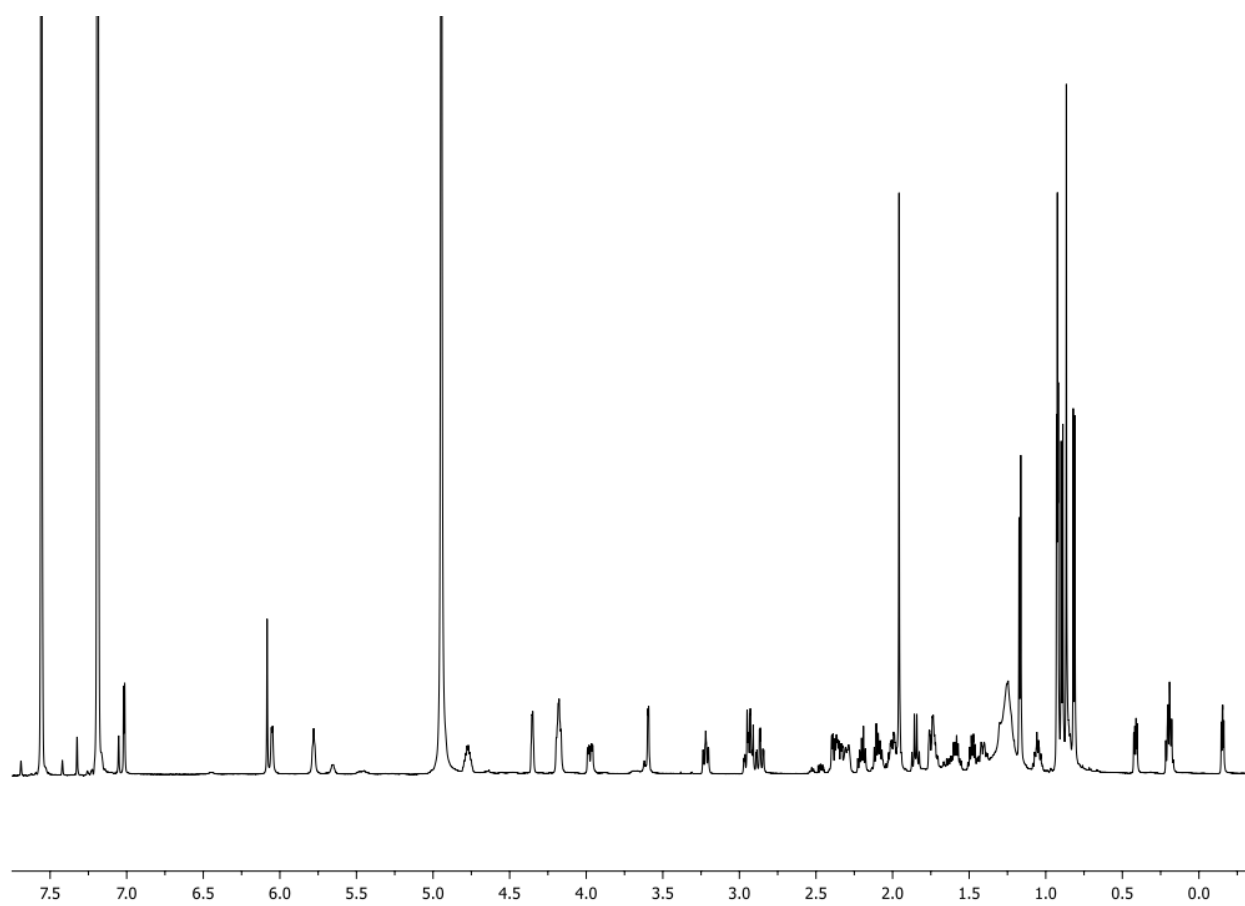

**Figure S3.** <sup>1</sup>H NMR spectrum of 3 $\beta$ ,5 $\alpha$ ,6 $\beta$ -trihydroxy-9-oxo-9,11-secogorgostan-11-ol (**1**) in pyridine-*d*<sub>5</sub>

**Table S1.** NMR data of 3 $\beta$ ,5 $\alpha$ ,6 $\beta$ -trihydroxy-9-oxo-9,11-secogorgostan-11-ol (**1**) in MeOH-*d*<sub>4</sub>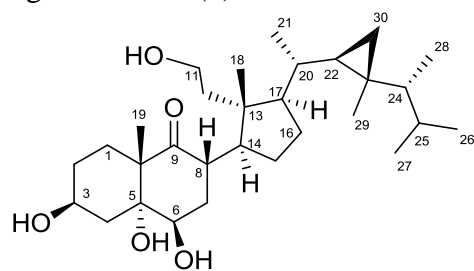

| C <sup>a</sup> | $\delta_{\text{H}}$ (mult, <i>J</i> in Hz)      | $\delta_{\text{C}}$ <sup>b</sup> | COSY                                                                | HMBC                                             | NOESY                                        |
|----------------|-------------------------------------------------|----------------------------------|---------------------------------------------------------------------|--------------------------------------------------|----------------------------------------------|
| 1              | $\alpha$ 2.18, m<br>$\beta$ 1.31, m             | 29.2, CH <sub>2</sub>            | H-1 $\beta$ , H <sub>2</sub> -2<br>H-1 $\alpha$ , H <sub>2</sub> -2 |                                                  | H-3<br>H <sub>3</sub> -19                    |
| 2              | $\alpha$ 1.88, m<br>$\beta$ 1.52, m             | 31.1, CH <sub>2</sub>            | H-2 $\beta$ , H <sub>2</sub> -1<br>H-2 $\alpha$ , H <sub>2</sub> -1 |                                                  |                                              |
| 3              | 4.00, tt (6.0, 12.0)                            | 68.0, CH                         | H <sub>2</sub> -2, H <sub>2</sub> -4                                |                                                  | H-1 $\alpha$ , H-2 $\alpha$ , H-4 $\alpha$   |
| 4              | $\beta$ 2.15, t (12.0)<br>$\alpha$ 1.70, m      | 40.4, CH <sub>2</sub>            | H-3, H-4 $\alpha$<br>H-3, H-4 $\beta$                               | C-5, C-6<br>C-5, C-6                             | H <sub>3</sub> -19<br>H-3, H-6               |
| 5              |                                                 | 80.7, C                          |                                                                     |                                                  |                                              |
| 6              | 3.66, m                                         | 75.7, CH                         | H <sub>2</sub> -7                                                   |                                                  | H-4 $\alpha$ , H <sub>2</sub> -7             |
| 7              | a 2.25, m<br>b 1.95, m                          | 35.9, CH <sub>2</sub>            | H-6, H-7b, H-8<br>H-6, H-7a, H-8                                    | C-9<br>C-9                                       |                                              |
| 8              | 3.36, m                                         | 38.6, CH                         | H <sub>2</sub> -7, H-14                                             | C-9                                              | H-14, H <sub>3</sub> -18, H <sub>3</sub> -19 |
| 9              |                                                 | 218.4, C                         |                                                                     |                                                  |                                              |
| 10             |                                                 | 52.6, C                          |                                                                     |                                                  |                                              |
| 11             | a 3.69, m<br>b 3.56, dt (5.5, 10.6)             | 59.1, CH <sub>2</sub>            | H-11b, H <sub>2</sub> -12<br>H-11a, H <sub>2</sub> -12              |                                                  |                                              |
| 12             | a 1.82, m<br>b 1.55, m                          | 41.7, CH <sub>2</sub>            | H <sub>2</sub> -11, H-12b<br>H <sub>2</sub> -11, H-12a              |                                                  |                                              |
| 13             |                                                 | 46.8, C                          |                                                                     |                                                  |                                              |
| 14             | 2.64, m                                         | 42.2, CH                         | H-8, H <sub>2</sub> -15                                             |                                                  | H-11b, H-17                                  |
| 15             | 1.46, m                                         | 23.4, CH <sub>2</sub>            | H <sub>2</sub> -16                                                  |                                                  |                                              |
| 16             | a 2.08, m<br>b 1.44, m                          | 29.3, CH <sub>2</sub>            | H <sub>2</sub> -15, H-16b<br>H <sub>2</sub> -15, H-16a              |                                                  | H <sub>3</sub> -29                           |
| 17             | 1.71, m                                         | 52.1, CH                         | H <sub>2</sub> -16, H-20                                            |                                                  |                                              |
| 18             | 0.81, s                                         | 17.7, CH <sub>3</sub>            |                                                                     | C-12, C-13, C-14, C-17<br>C-1, C-5, C-9, C-10    | H-4 $\beta$ , H-8, H <sub>3</sub> -21<br>H-8 |
| 19             | 1.56, s                                         | 21.4, CH <sub>3</sub>            |                                                                     |                                                  |                                              |
| 20             | 1.12, m                                         | 36.3, CH                         | H-17, H <sub>3</sub> -21, H-22                                      |                                                  |                                              |
| 21             | 1.15, brs                                       | 21.4, CH <sub>3</sub>            | H-20                                                                | C-17, C-20, C-22                                 | H <sub>3</sub> -18, H-22, H-30a              |
| 22             | 0.32, m                                         | 33.3, CH                         | H-20, H <sub>2</sub> -30                                            |                                                  |                                              |
| 23             |                                                 | 26.9, C                          |                                                                     |                                                  |                                              |
| 24             | 0.34, m                                         | 52.2, CH                         | H-25, H <sub>3</sub> -28                                            | C-23, C-25                                       |                                              |
| 25             | 1.62, m                                         | 33.4, CH                         | H <sub>3</sub> -26, H <sub>3</sub> -27                              |                                                  |                                              |
| 26             | 0.93, d (7.0)                                   | 21.9, CH <sub>3</sub>            | H-25                                                                | C-24, C-25, C-27                                 |                                              |
| 27             | 1.02, d (6.6)                                   | 22.7, CH <sub>3</sub>            | H-25                                                                | C-24, C-25, C-26                                 |                                              |
| 28             | 1.02, d (6.6)                                   | 15.8, CH <sub>3</sub>            | H-24                                                                | C-23, C-24, C-25                                 |                                              |
| 29             | 0.97, s                                         | 14.7, CH <sub>3</sub>            | H <sub>2</sub> -30                                                  | C-22, C-23, C-24, C-30                           | H-30b                                        |
| 30             | a 0.54, dd (4.4, 9.3)<br>b -0.05, dd (4.4, 5.7) | 22.2, CH <sub>2</sub>            | H-22, H <sub>3</sub> -29, H-30b<br>H-22, H <sub>3</sub> -29, H-30a  | C-22, C-23, C-24, C-29<br>C-22, C-23, C-24, C-29 |                                              |

<sup>a</sup> All assignments are based on extensive 1D and 2D NMR measurements (COSY, HSQC, HMBC).

<sup>b</sup> Multiplicities determined by DEPT.

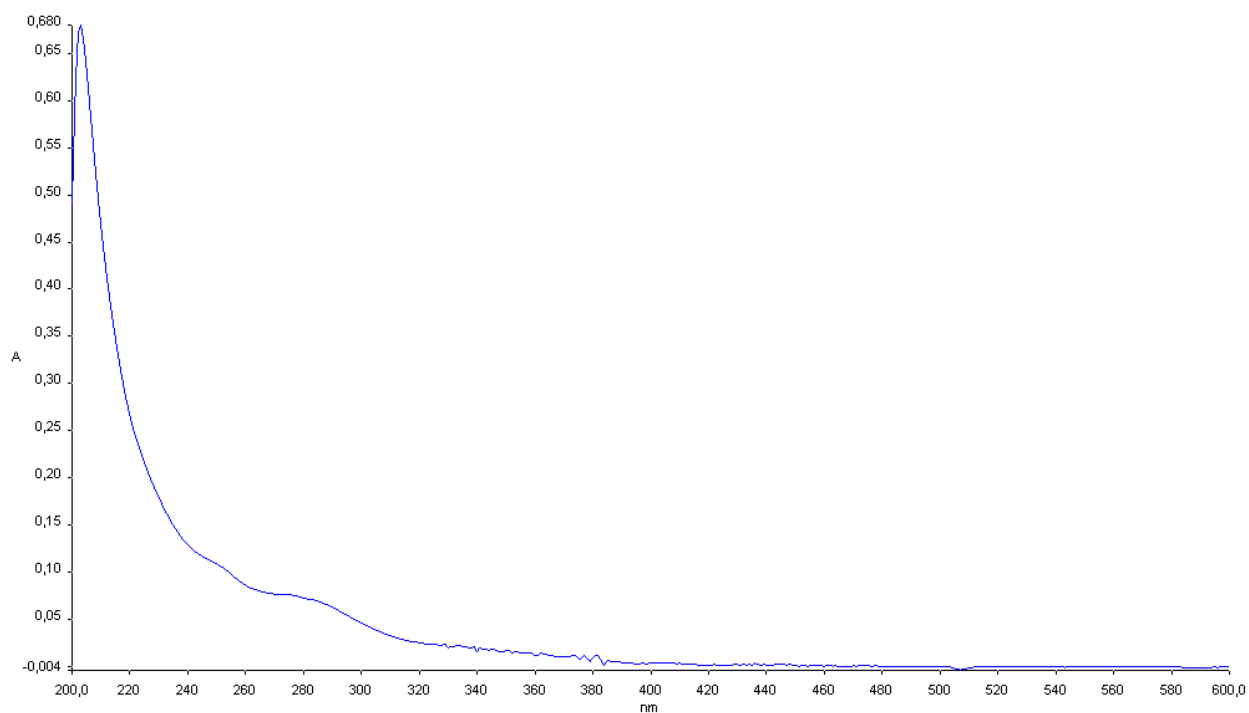

**Figure S4.** UV spectrum of 3 $\beta$ ,5 $\alpha$ ,6 $\beta$ -trihydroxy-9-oxo-9,11-secogorgostan-11-ol (**1**) in MeOH

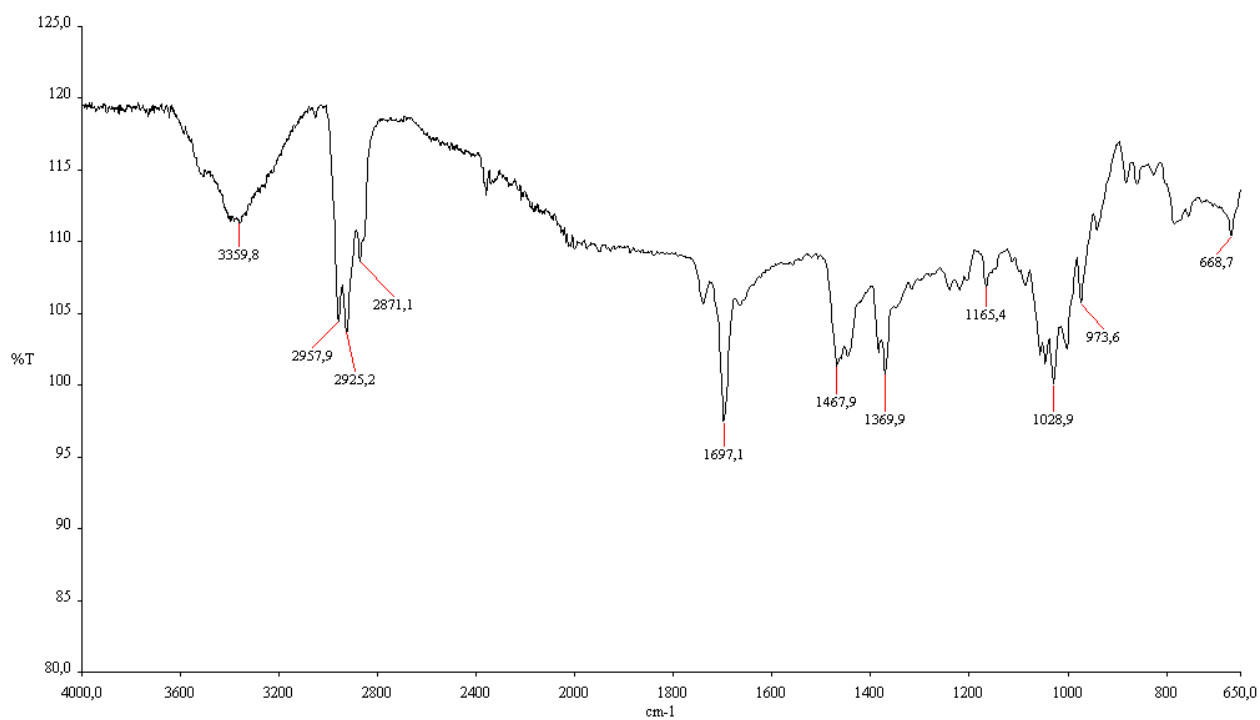

**Figure S5.** IR spectrum of 3 $\beta$ ,5 $\alpha$ ,6 $\beta$ -trihydroxy-9-oxo-9,11-secogorgostan-11-ol (**1**)

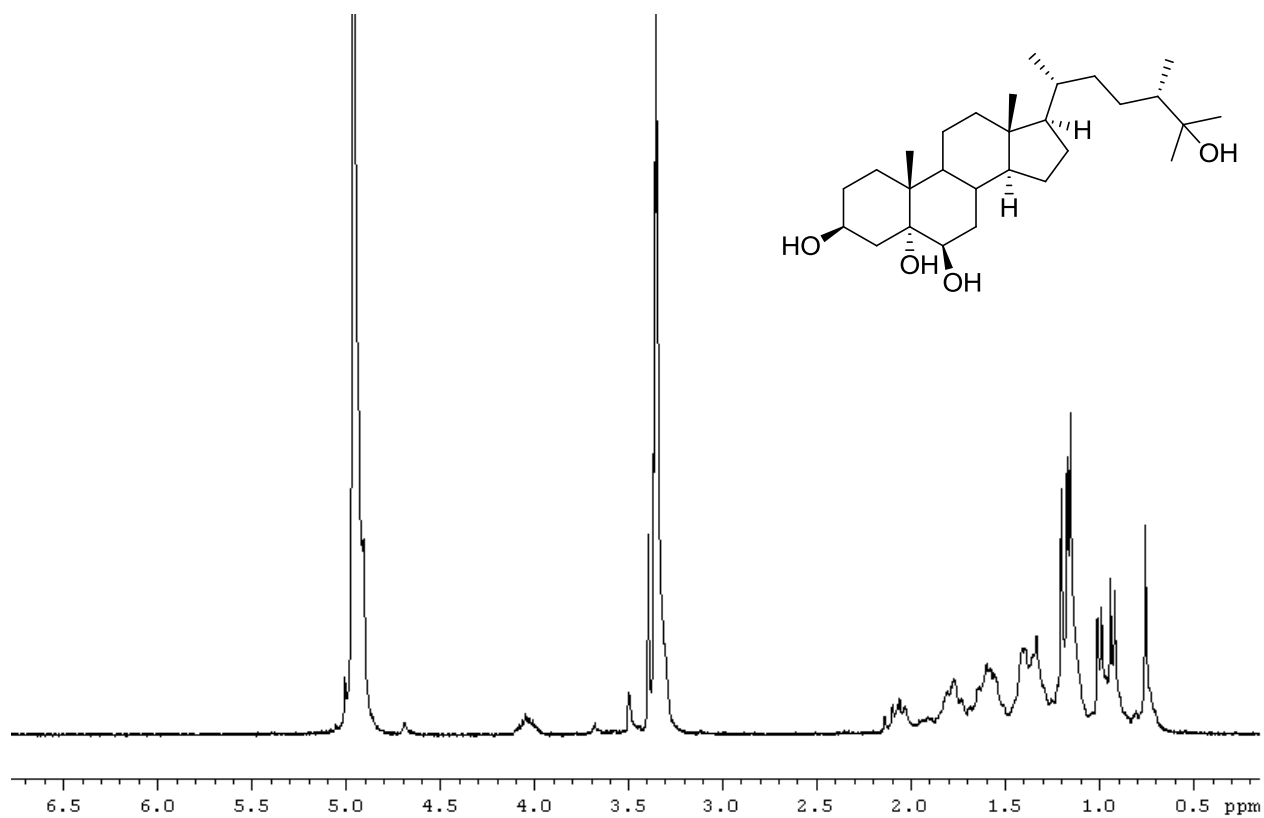

**Figure S6.**  $^1\text{H}$  NMR spectrum of steroid **2** in  $\text{MeOH-}d_4$

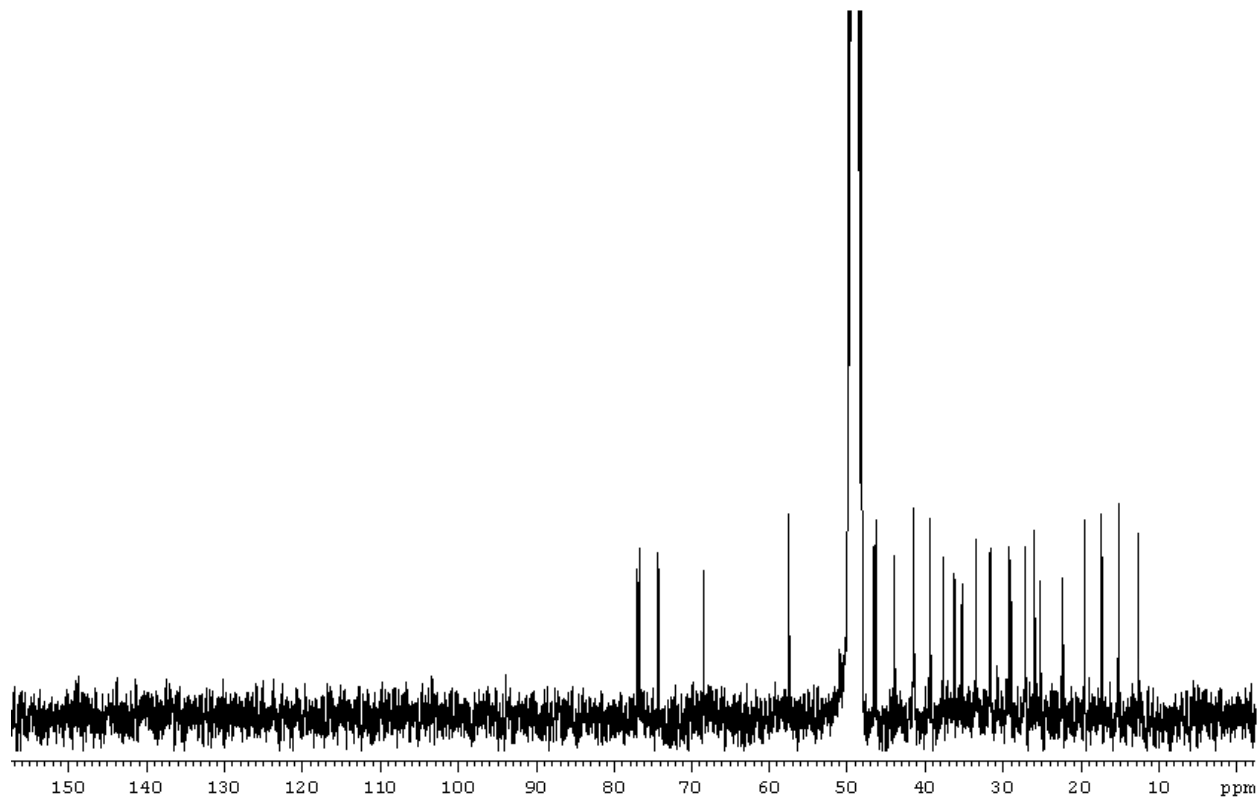

**Figure S7.**  $^{13}\text{C}$  NMR spectrum of steroid **2** in  $\text{MeOH-}d_4$

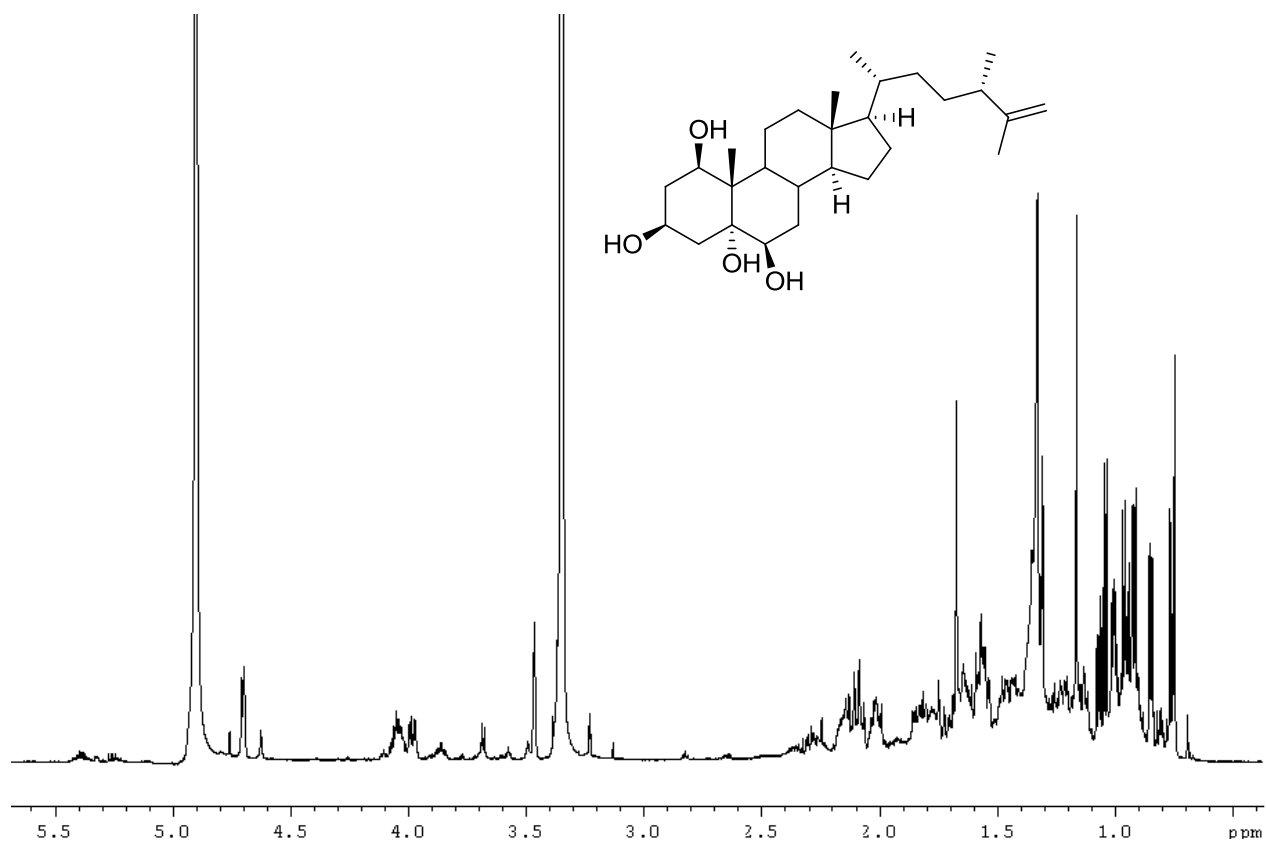

**Figure S8.**  $^1\text{H}$  NMR spectrum of steroid 3 in  $\text{MeOH-}d_4$

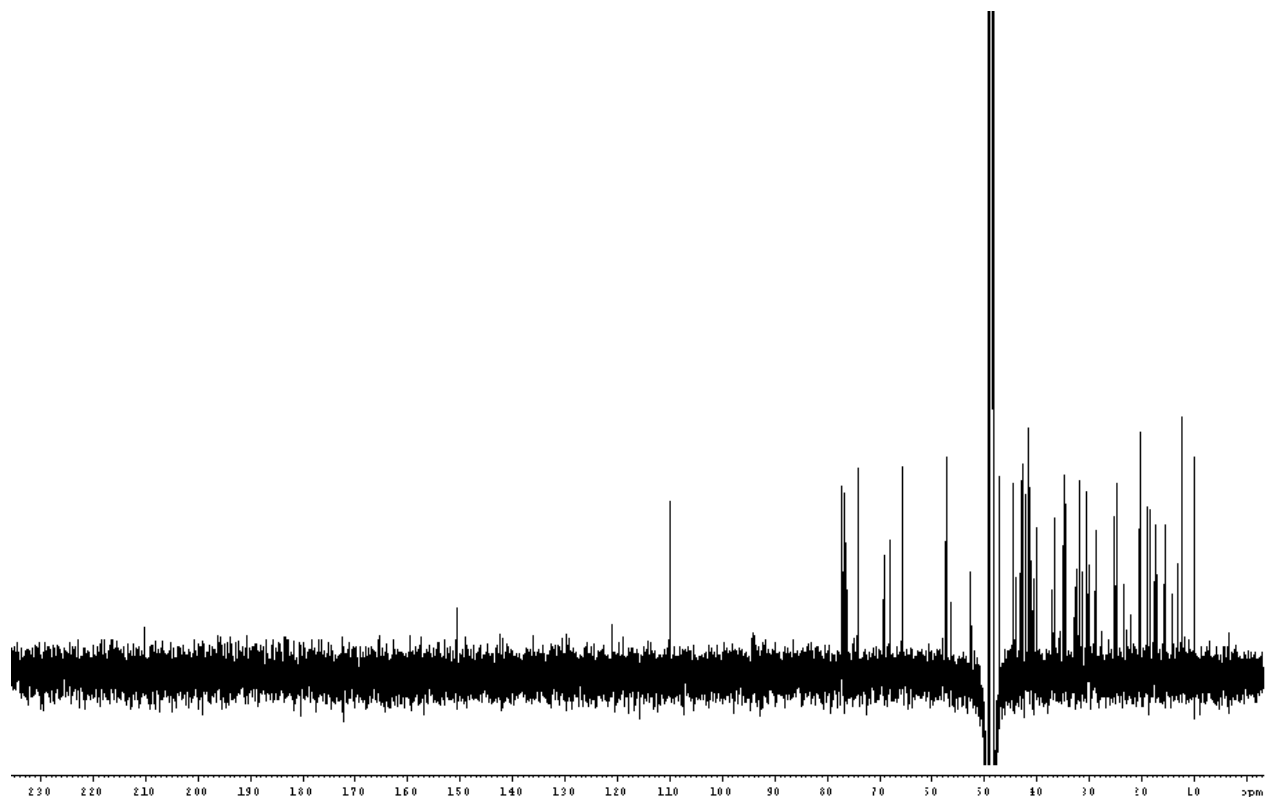

**Figure S9.**  $^{13}\text{C}$  NMR spectrum of steroid 3 in  $\text{MeOH-}d_4$



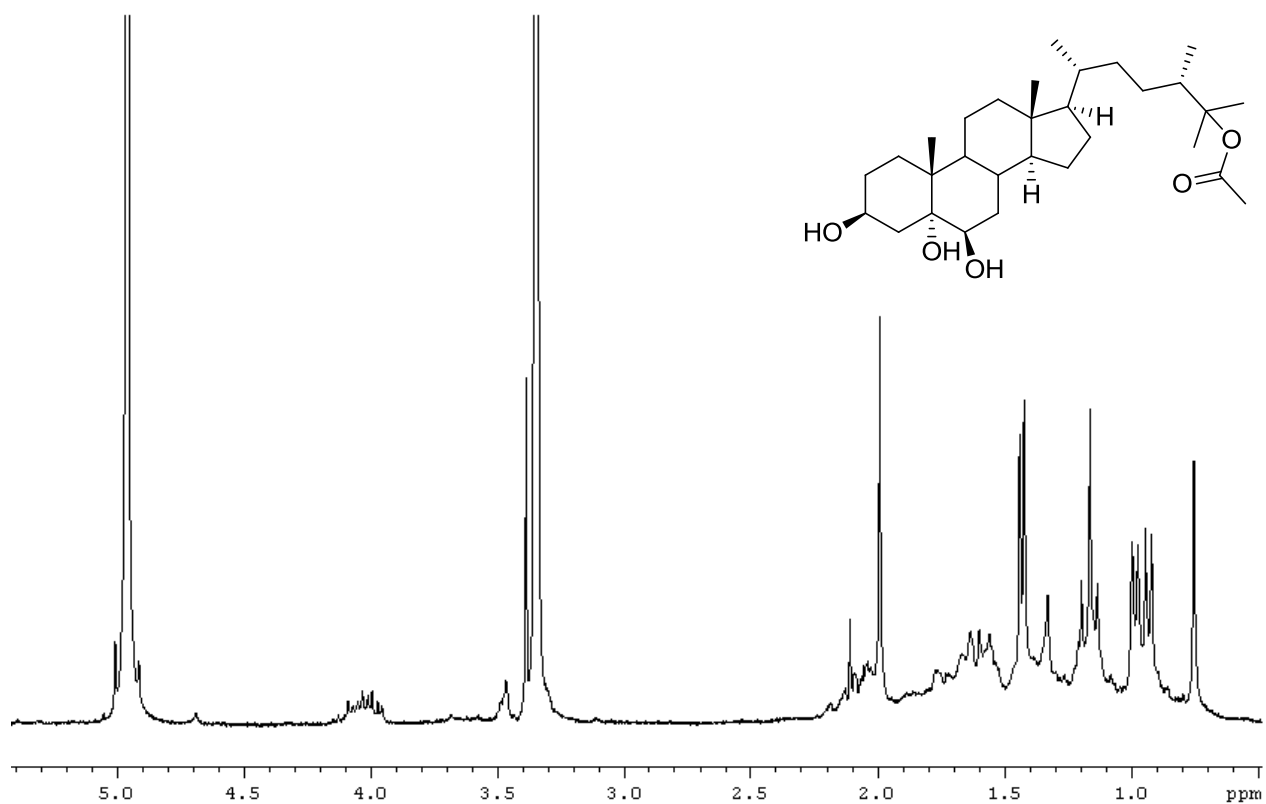

**Figure S10.** <sup>1</sup>H NMR spectrum of steroid **4** in MeOH-*d*<sub>4</sub>

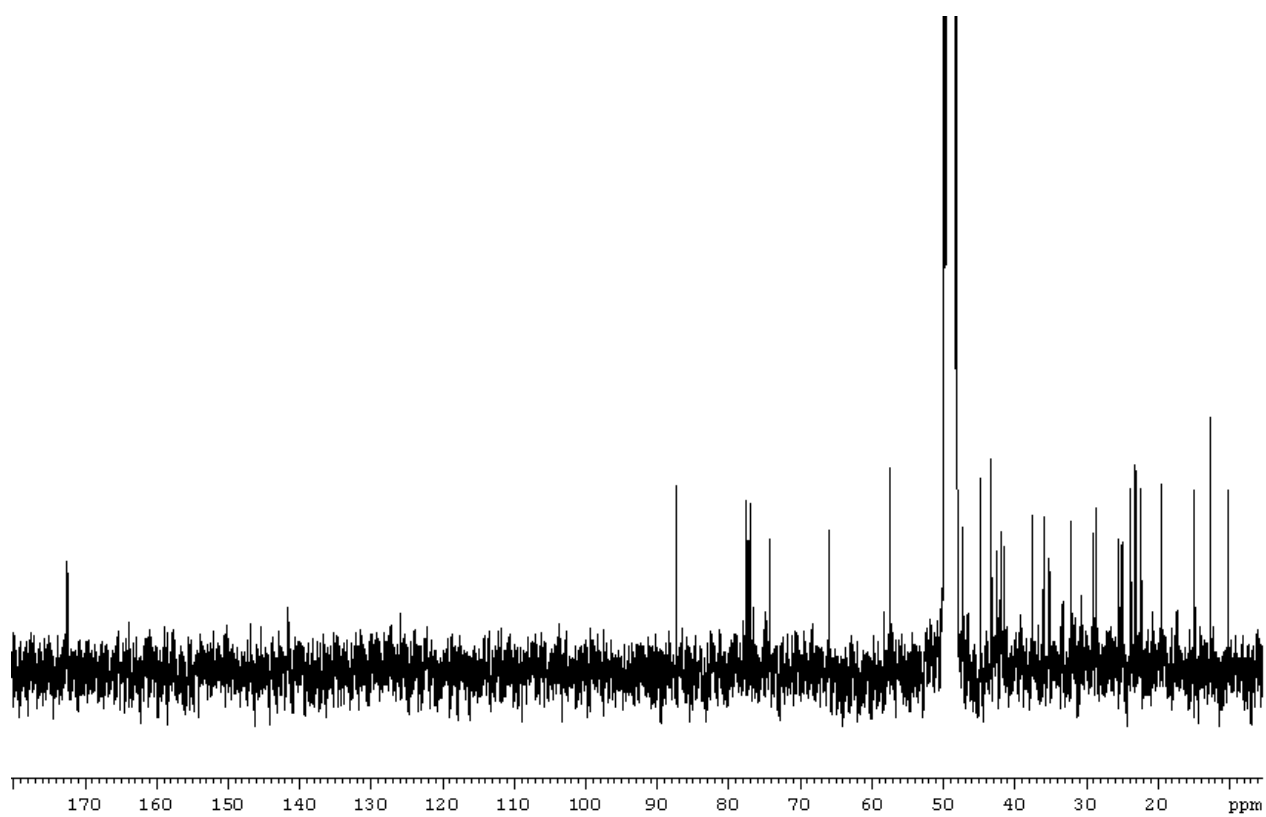

**Figure S11.** <sup>13</sup>C NMR spectrum of steroid **4** in MeOH-*d*<sub>4</sub>

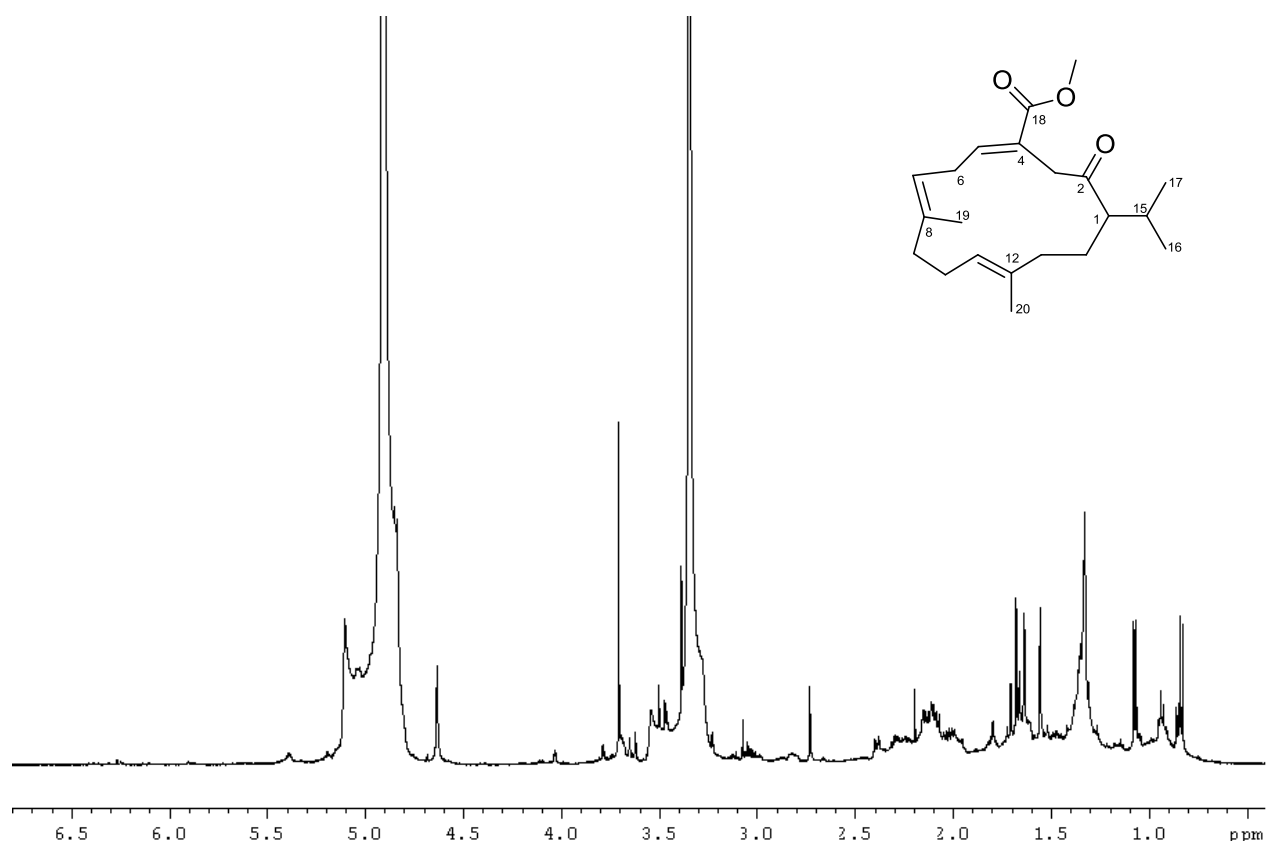

**Figure S12.**  $^1\text{H}$  NMR spectrum of 6,13-bisdesoxomethyl sarcoate (**5**) in  $\text{MeOH-}d_4$

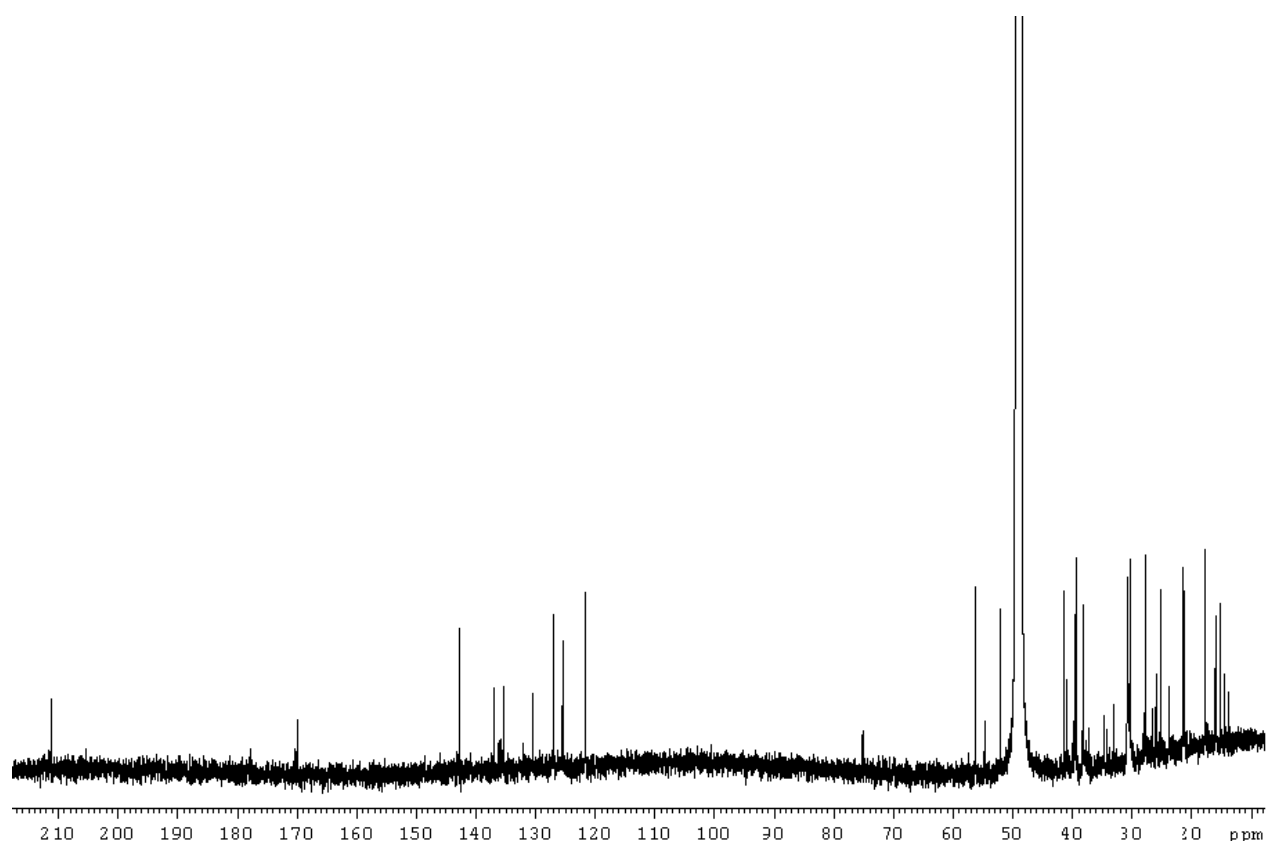

**Figure S13.**  $^{13}\text{C}$  NMR spectrum of 6,13-bisdesoxomethyl sarcoate (**5**) in  $\text{MeOH-}d_4$

**Table S2.** NMR data of 6,13-bisdesoxomethyl sarcoate (**5**) in MeOH-*d*<sub>4</sub>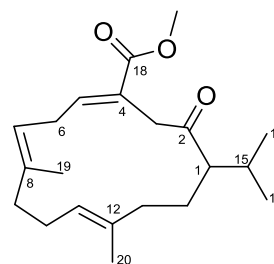

| C <sup>a</sup> | $\delta_{\text{H}}$ (mult, <i>J</i> in Hz) | $\delta_{\text{C}}$ <sup>b</sup> | COSY                                                             | HMBC                                       |
|----------------|--------------------------------------------|----------------------------------|------------------------------------------------------------------|--------------------------------------------|
| 1              | 2.39, dt (10.3, 3.3)                       | 56.2, CH                         | H-14a, H-15                                                      | C-2, C-14, C-15, C-16, C-17                |
| 2              |                                            | 211.3, C                         |                                                                  |                                            |
| 3              | a 3.64, d (17.7)<br>b 3.49, d (17.7)       | 41.3, CH <sub>2</sub>            | H-3b, H-5<br>H-3a, H-5                                           | C-2, C-4, C-5, C-18<br>C-2, C-4, C-5, C-18 |
| 4              |                                            | 130.5, C                         |                                                                  |                                            |
| 5              | 7.08 ddd (1.5, 7.0, 8.2)                   | 142.8, CH                        | H <sub>2</sub> -6, H-3b                                          | C-18                                       |
| 6              | a 3.05, m<br>b 2.83, m                     | 27.8, CH <sub>2</sub>            | H-5, H-6b, H-7<br>H-5, H-6b, H-7                                 | C-4, C-5, C-7, C-8<br>C-4, C-5, C-7, C-8   |
| 7              | 5.05, m                                    | 121.6, CH                        | H-3a, H <sub>2</sub> -6                                          |                                            |
| 8              |                                            | 136.9, C                         |                                                                  |                                            |
| 9              | 2.16, m                                    | 39.5, CH                         | H <sub>2</sub> -6                                                |                                            |
| 10             | a 2.26, m<br>b 2.14, m                     | 25.1, CH <sub>2</sub>            | H <sub>2</sub> -9, H-10b, H-11<br>H <sub>2</sub> -9, H-10a, H-11 |                                            |
| 11             | 4.81, m                                    | 127.0, CH                        | H <sub>2</sub> -10, H <sub>3</sub> -20                           |                                            |
| 12             |                                            | 135.4, C                         |                                                                  |                                            |
| 13             | a 2.11, m<br>b 1.99, m                     | 38.2, CH <sub>2</sub>            | H-13b, H-14b<br>H-13a, H-14b                                     | C-1, C-12, C-14<br>C-1, C-12, C-14         |
| 14             | a 1.81, m<br>b 1.47, m                     | 21.2, CH <sub>2</sub>            | H-14b<br>H <sub>2</sub> -13, H-14a                               | C-1, C-2, C-12, C-13, C-15, C-16, C-17     |
| 15             | 2.31, m                                    | 30.4, CH                         | H-1, H-16, H-17                                                  | C-2                                        |
| 16             | 0.84, d (7.0)                              | 17.8, CH <sub>3</sub>            | H-15                                                             | C-1, C-15, C-17                            |
| 17             | 1.08, d (7.0)                              | 21.4, CH <sub>3</sub>            | H-15                                                             | C-1, C-15, C-16                            |
| 18             |                                            | 170.0, C                         |                                                                  |                                            |
| 19             | 1.68, br s                                 | 16.0, CH <sub>3</sub>            | H-7                                                              | C-7, C-8, C-9                              |
| 20             | 1.56, br s                                 | 15.2, CH <sub>3</sub>            | H-11                                                             | C-11, C-12, C-13                           |
| OMe            | 3.71, s                                    | 52.1, CH <sub>3</sub>            |                                                                  | C-4, C-18                                  |

<sup>a</sup> All assignments are based on extensive 1D and 2D NMR measurements (COSY, HSQC, HMBC).

<sup>b</sup> Multiplicities determined by DEPT.

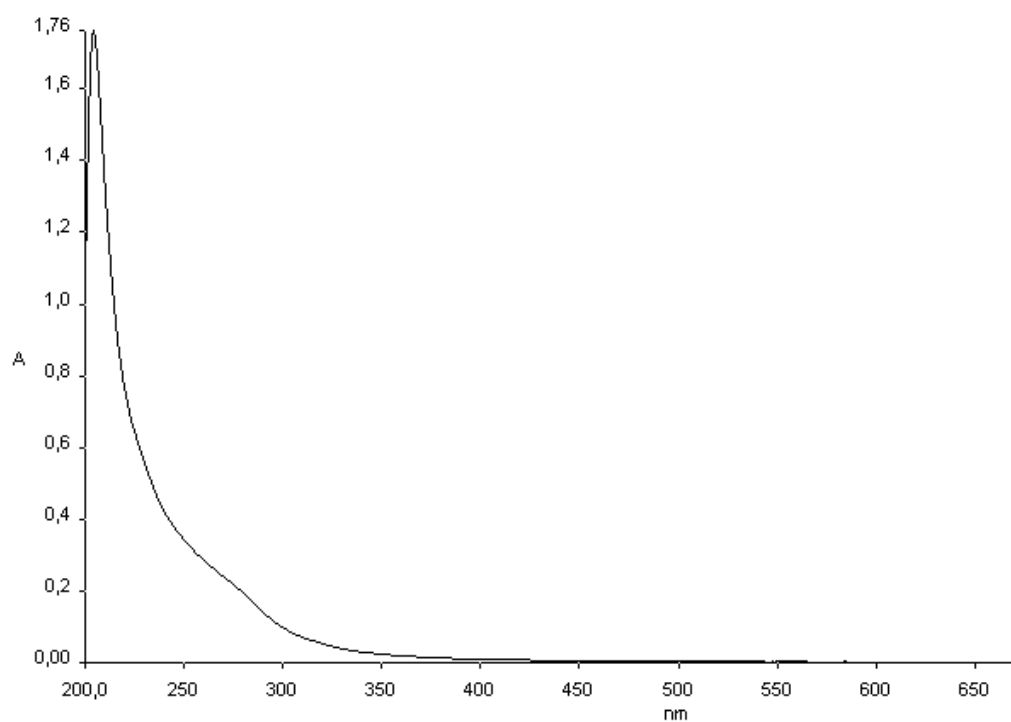

**Figure S14.** UV spectrum of 6,13-bisdesoxomethyl sarcoate (**5**) in MeOH

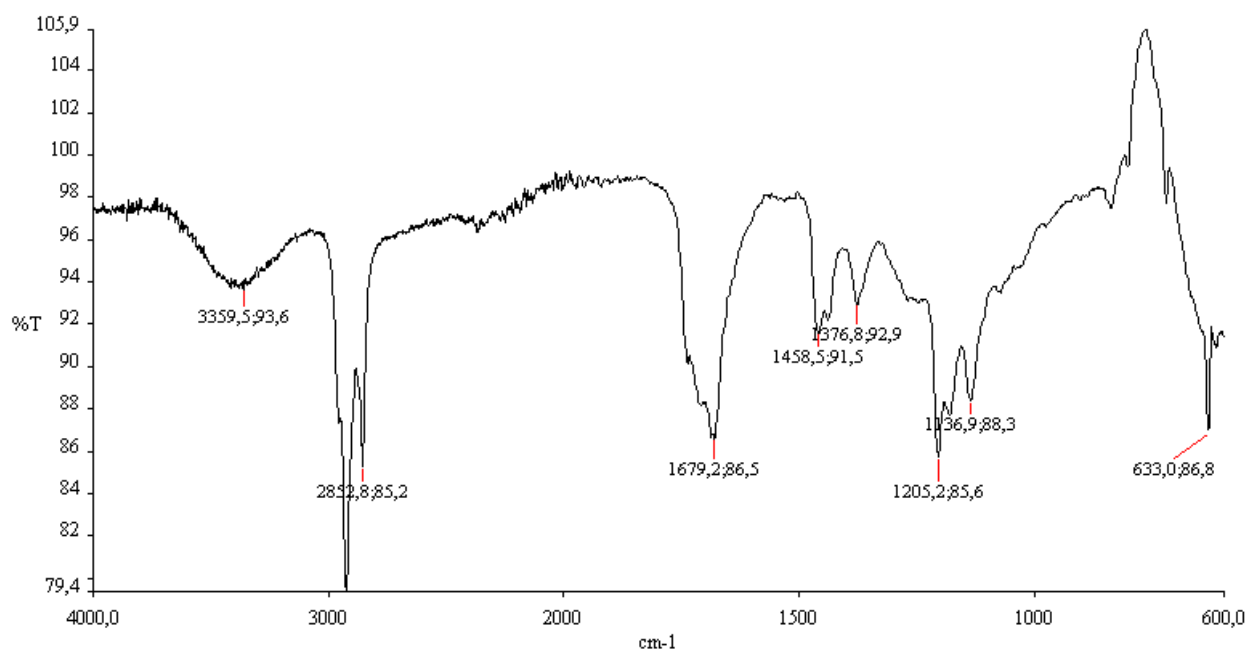

**Figure S15.** IR spectrum of 6,13-bisdesoxomethyl sarcoate (**5**)

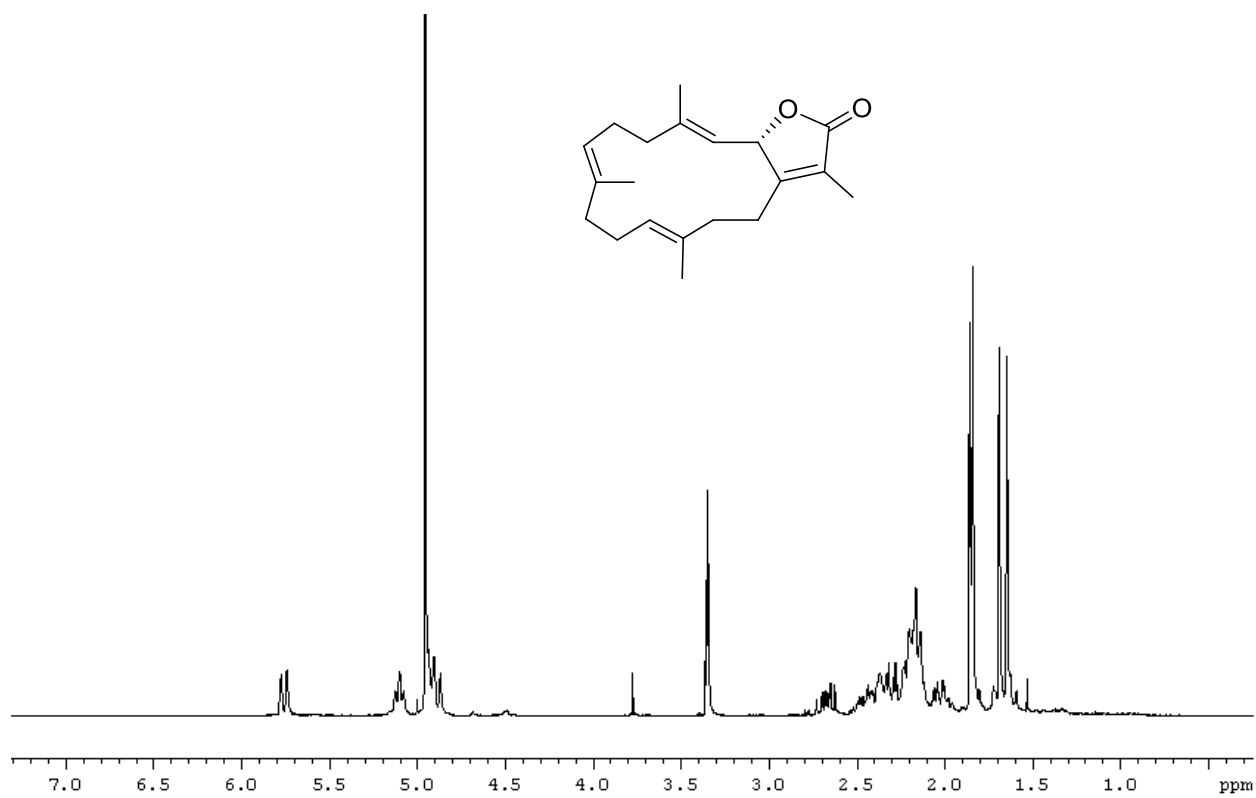

**Figure S16.**  $^1\text{H}$  NMR spectrum of sarcophytonin B (6) in  $\text{MeOH-}d_4$

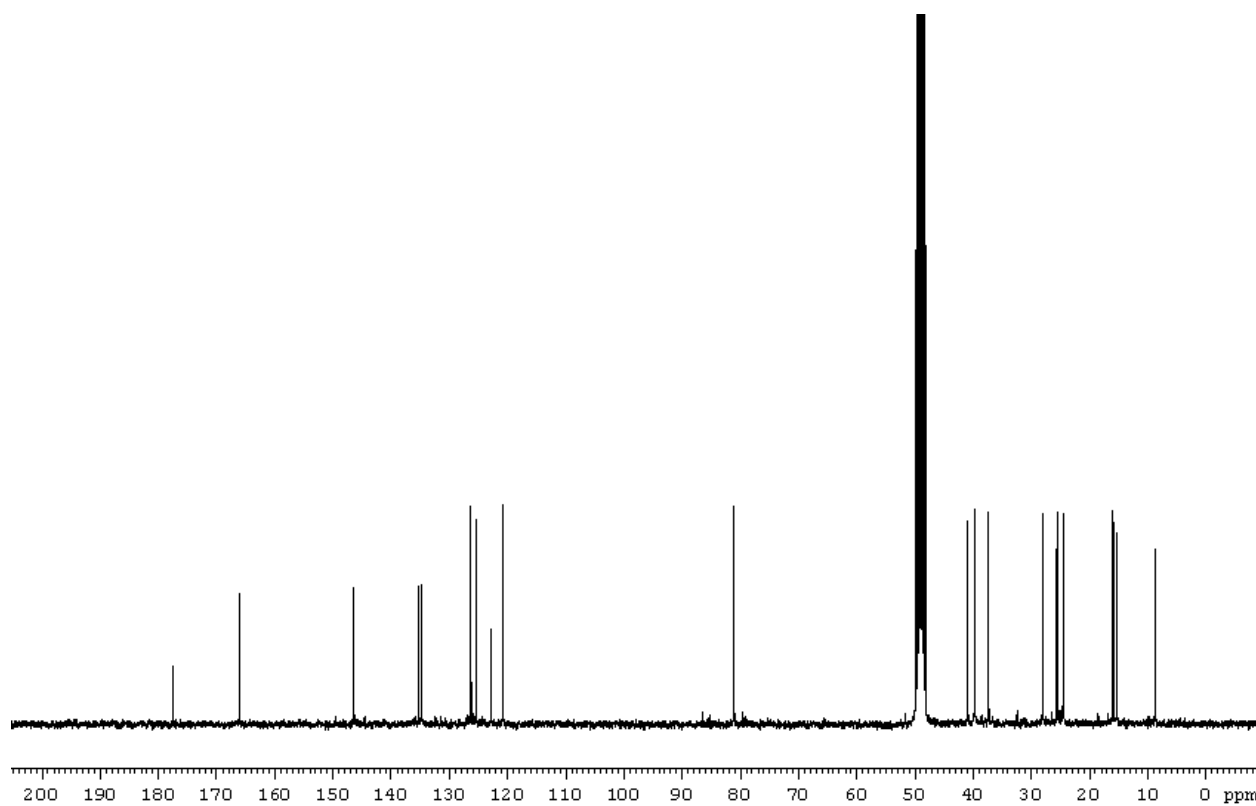

**Figure S17.**  $^{13}\text{C}$  NMR spectrum of sarcophytonin B (6) in  $\text{MeOH-}d_4$

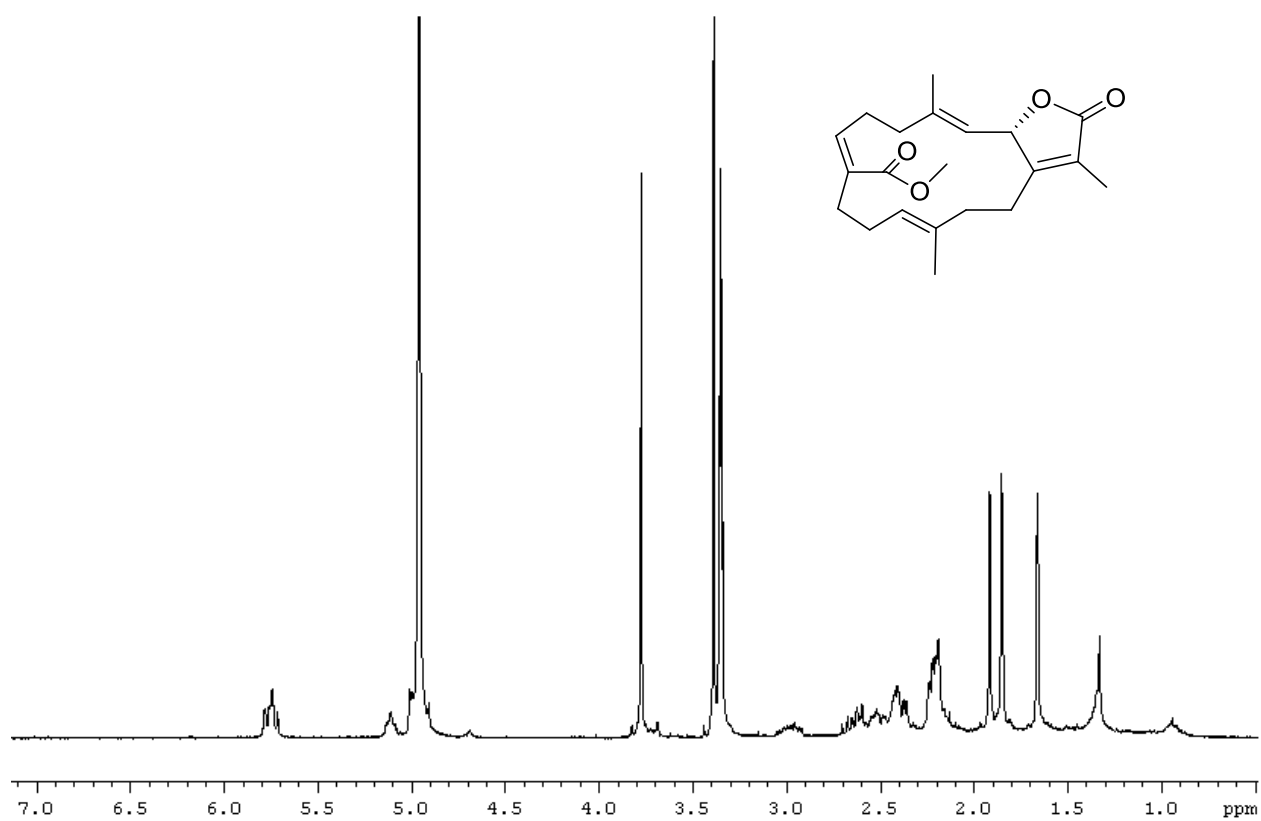

**Figure S18.**  $^1\text{H}$  NMR spectrum of compound **7** in  $\text{MeOH-}d_4$

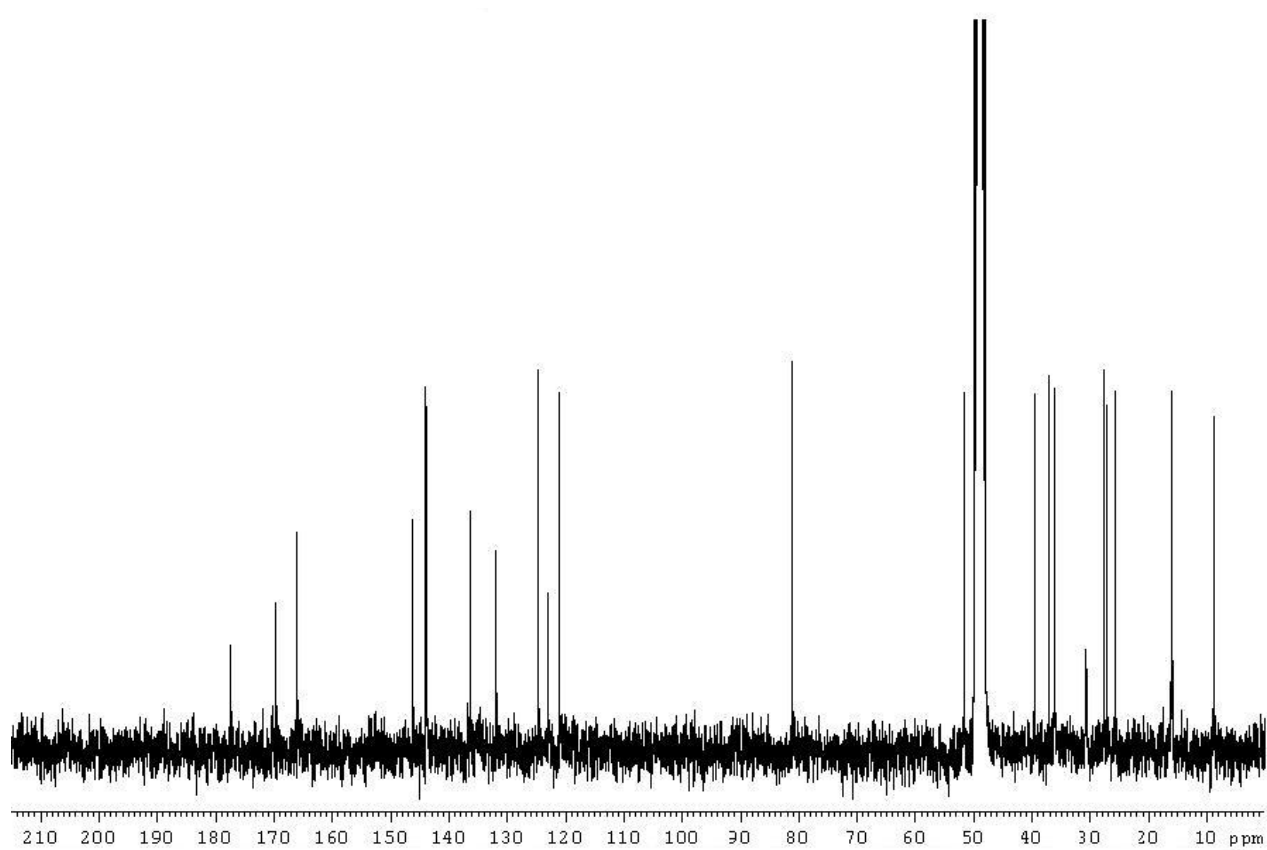

**Figure S19.**  $^{13}\text{C}$  NMR spectrum of compound **7** in  $\text{MeOH-}d_4$

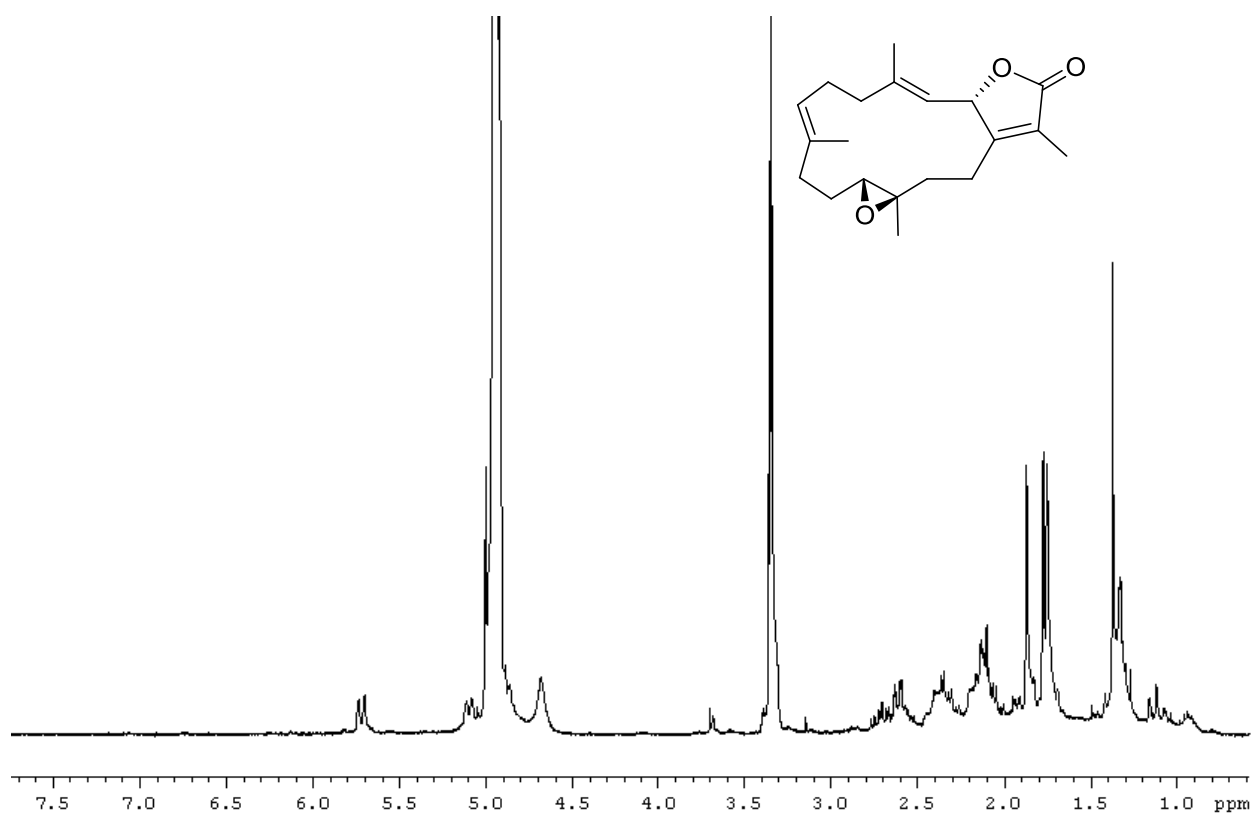

**Figure S20.**  $^1\text{H}$  NMR spectrum of (2*S*)-isosarcophine (**8**) in  $\text{MeOH-}d_4$

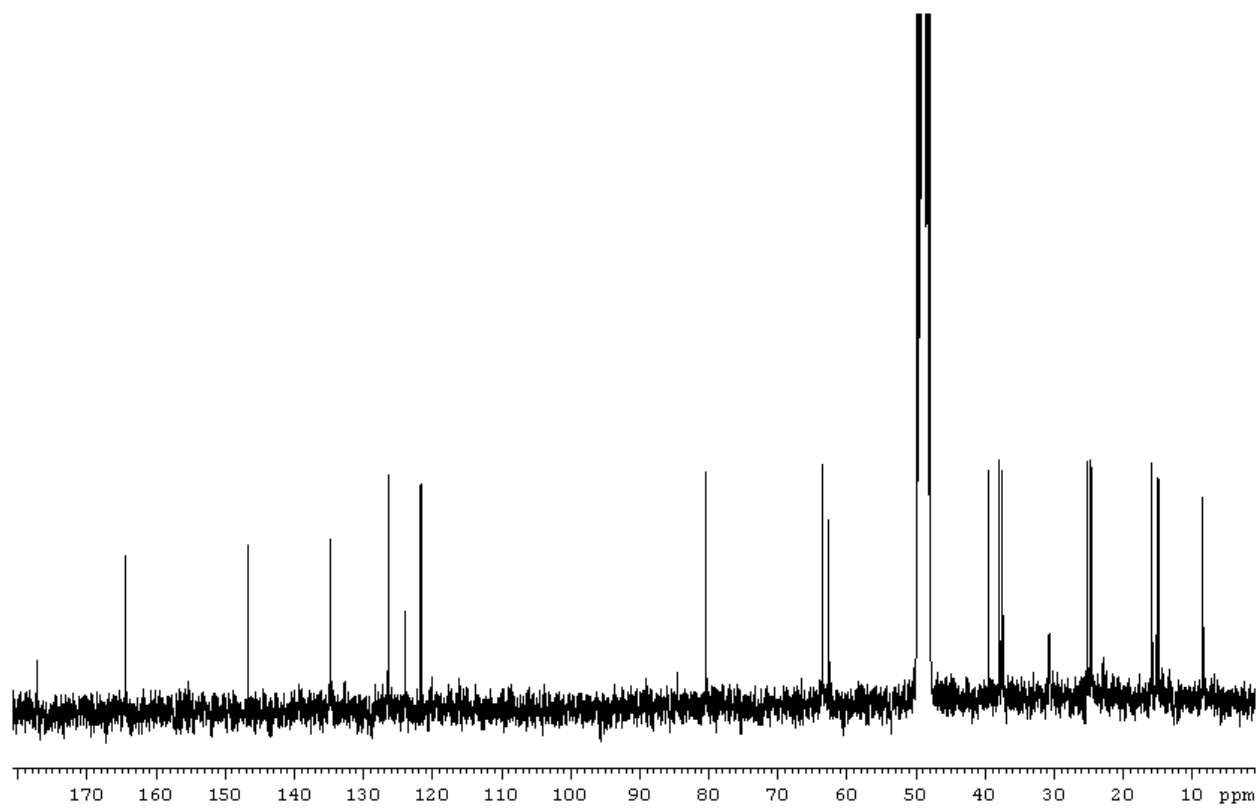

**Figure S21.**  $^{13}\text{C}$  NMR spectrum of (2*S*)-isosarcophine (**8**) in  $\text{MeOH-}d_4$

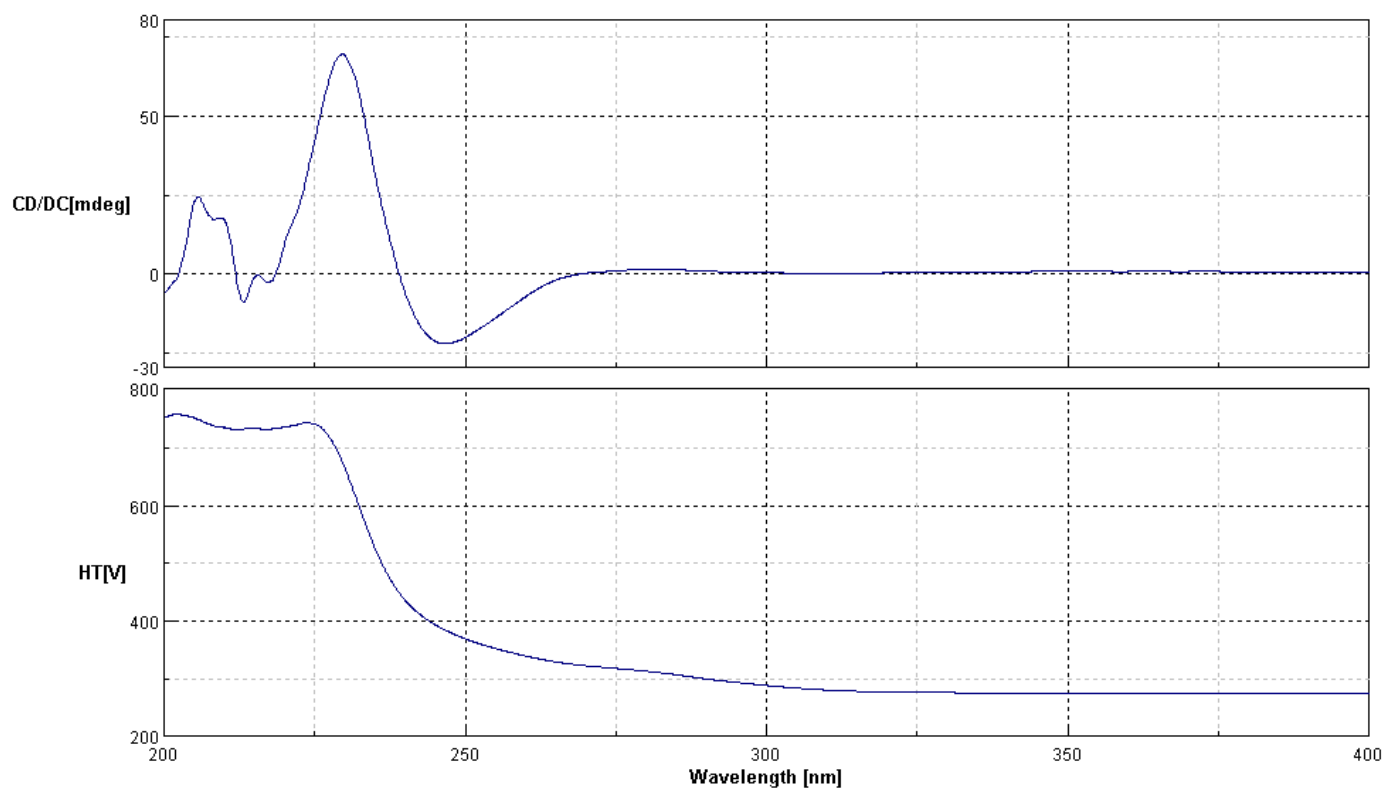

**Figure S22.** ECD spectrum of (2*S*)-isosarcophine (**8**) in MeOH



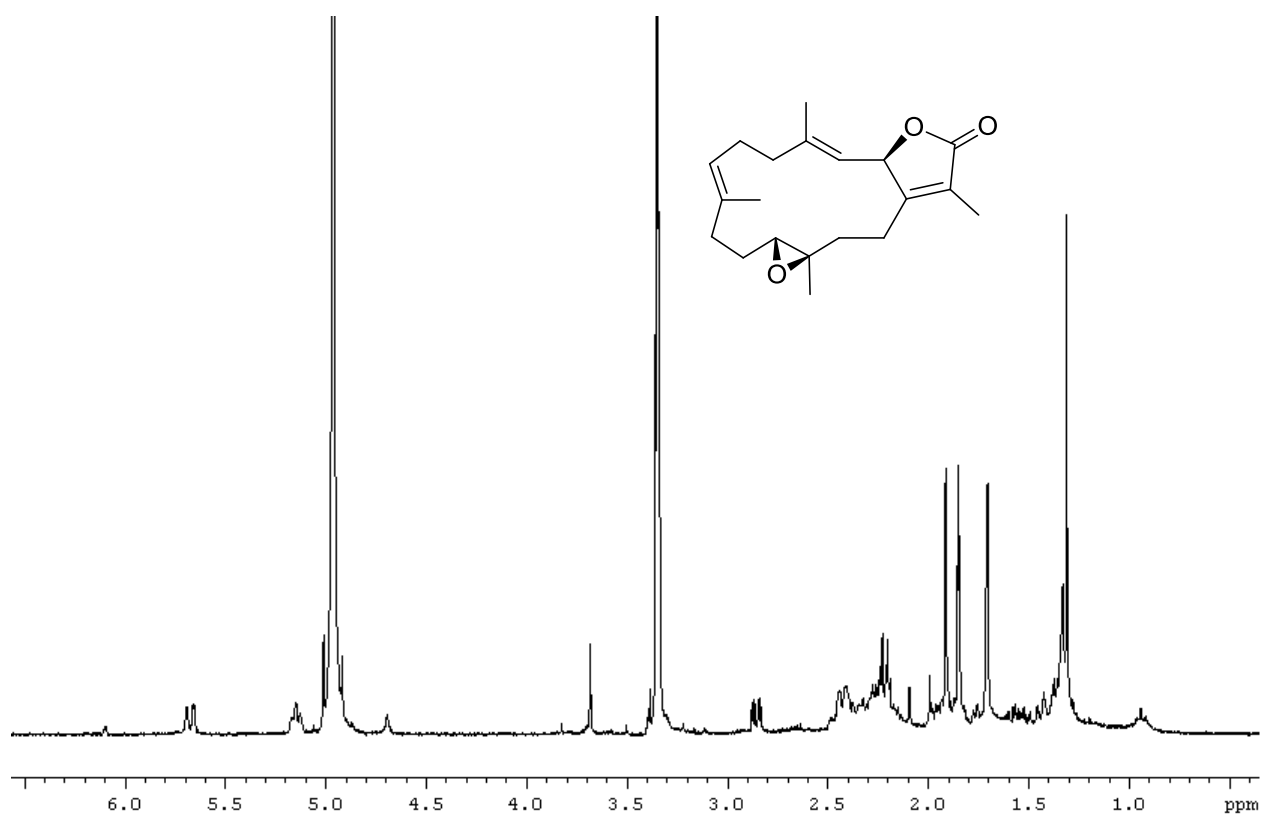

**Figure S23.**  $^1\text{H}$  NMR spectrum of (2*R*)-isosarcophine (9) in  $\text{MeOH-}d_4$

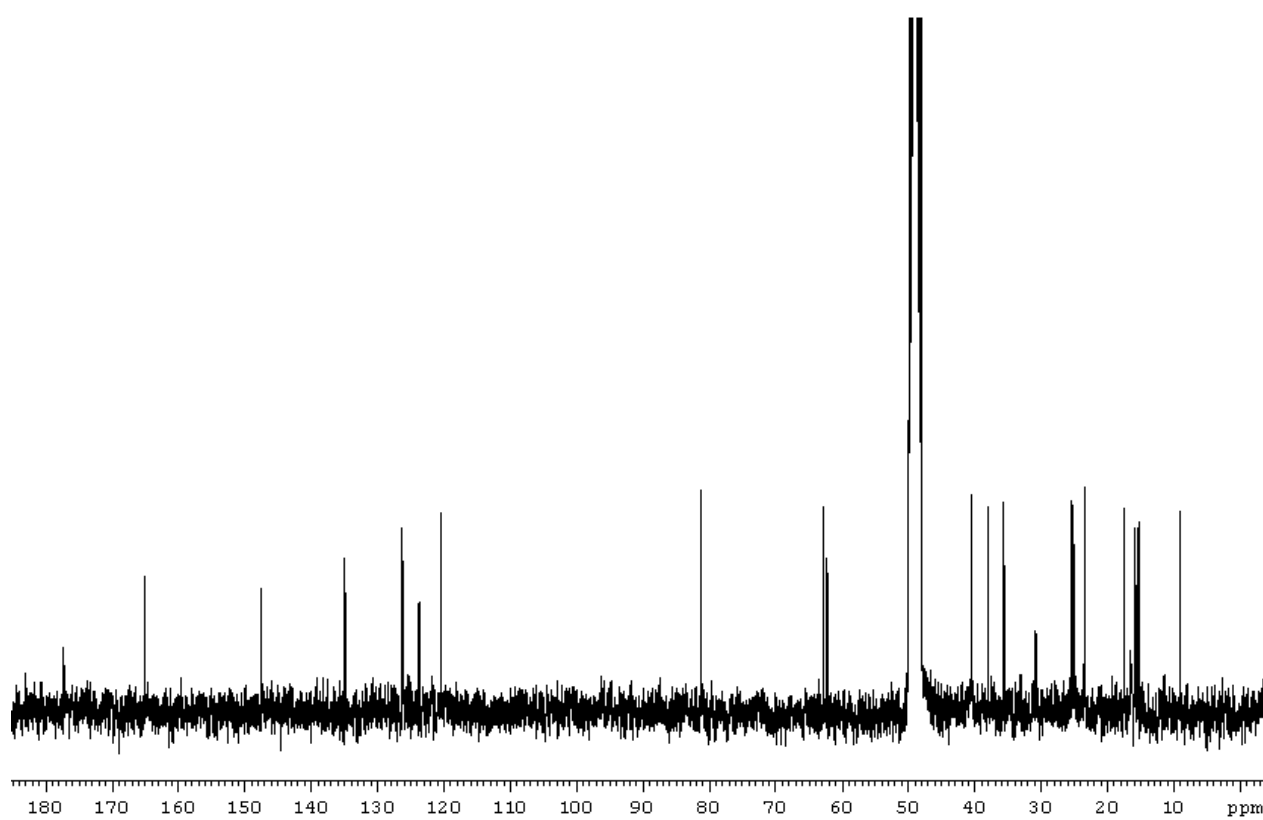

**Figure S24.**  $^{13}\text{C}$  NMR spectrum of (2*R*)-isosarcophine (9) in  $\text{MeOH-}d_4$

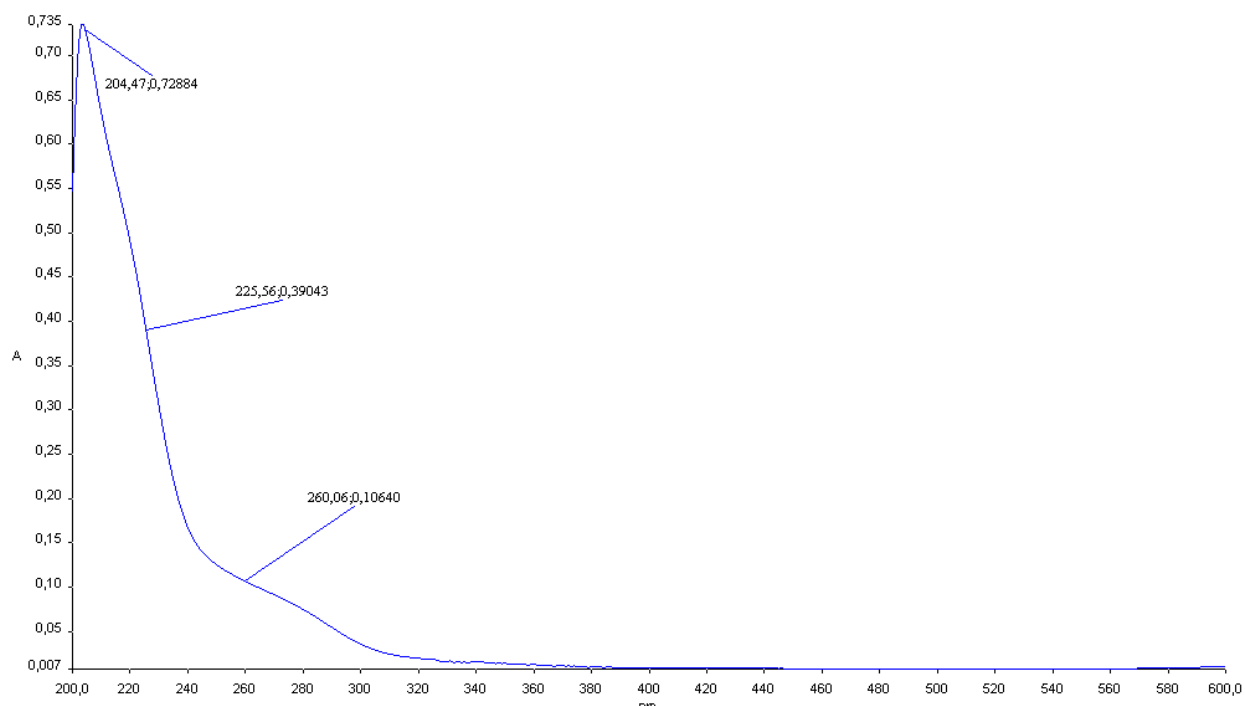

**Figure S25.** UV spectrum of (2R)-isosarcophine (9)

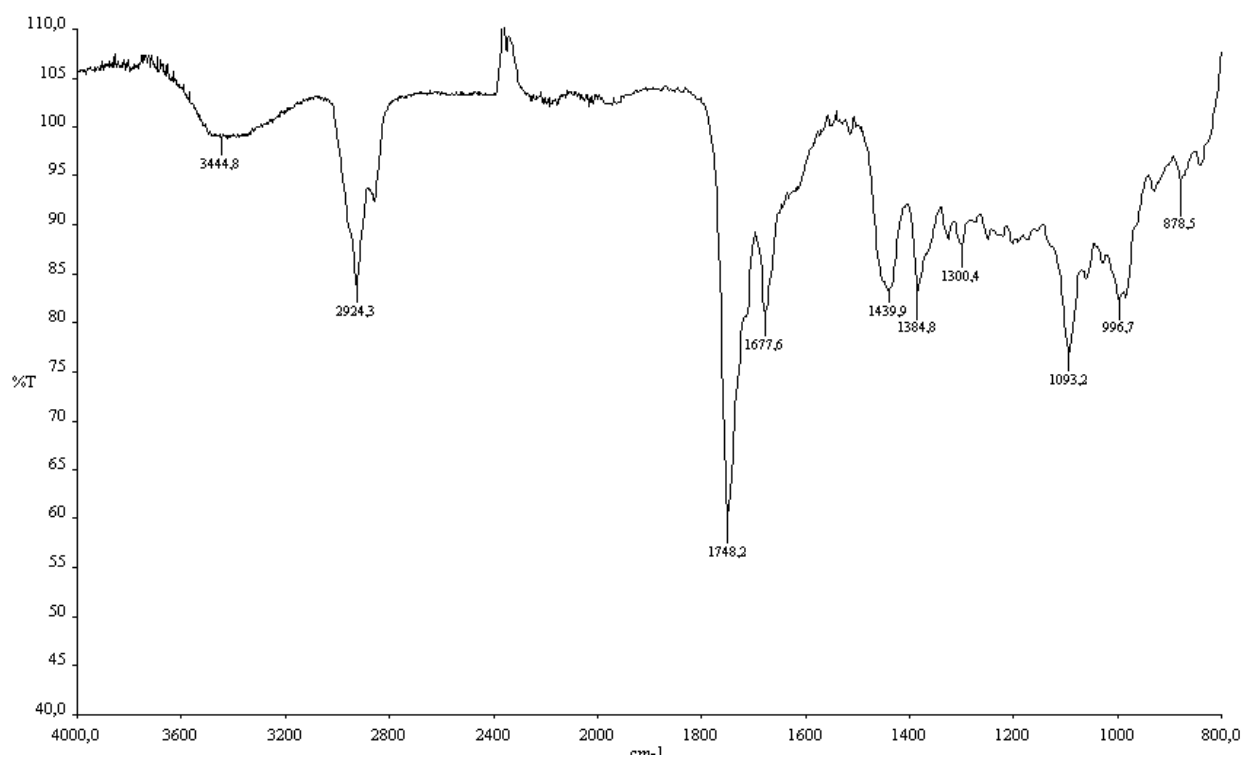

**Figure S26.** IR spectrum of (2R)-isosarcophine (9)

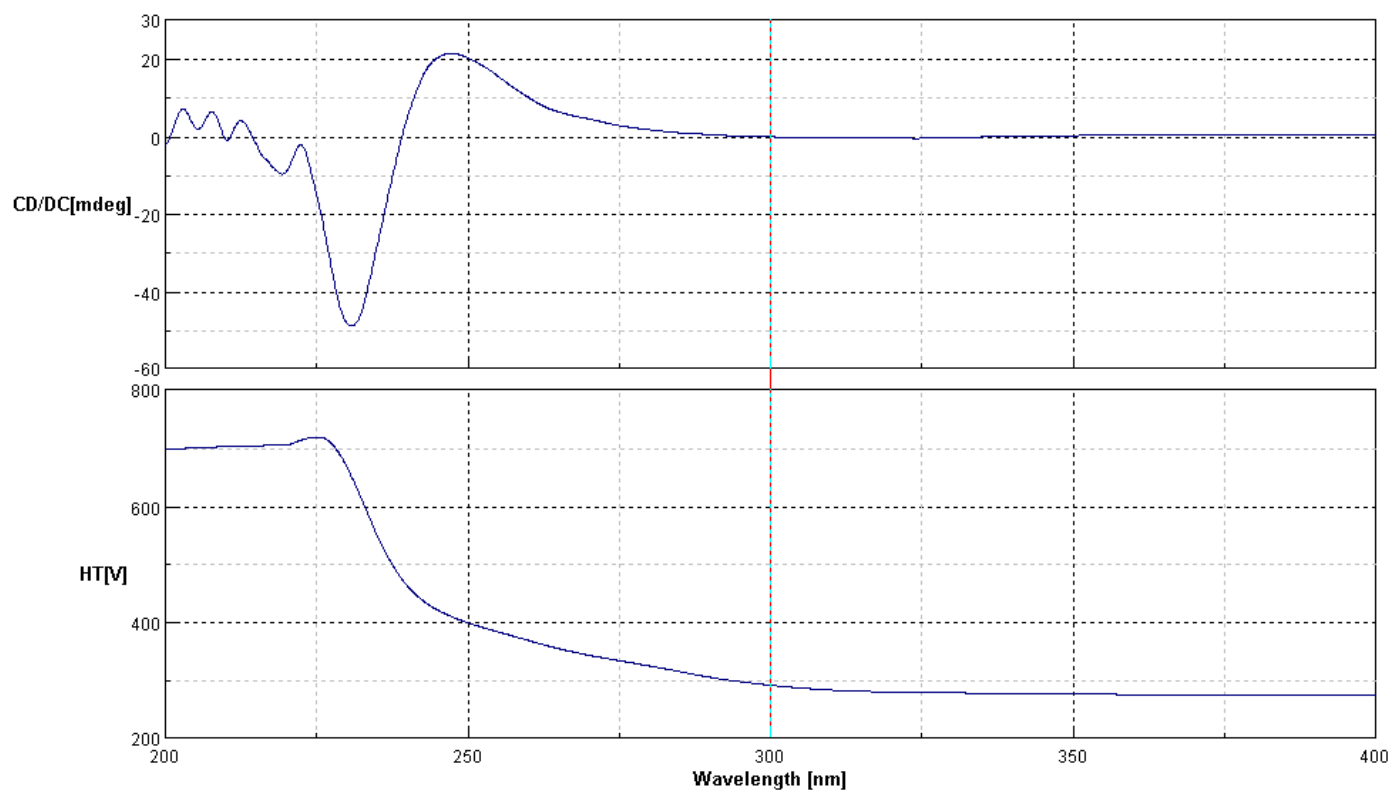

**Figure S27.** ECD spectrum of (2*R*)-isosarcophine (**9**) in MeOH

**Table S3.**  $^1\text{H}$  and  $^{13}\text{C}$  NMR data of 2*S*-isosarcophine (**8**) and 2*R*-isosarcophine (**9**) in  $\text{MeOH-}d_4$ 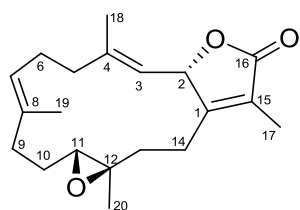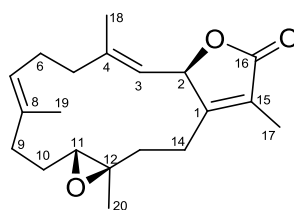

| 2 <i>S</i> -isosarcophine ( <b>8</b> ) |                                       |                       | 2 <i>R</i> -isosarcophine ( <b>9</b> ) |                       |
|----------------------------------------|---------------------------------------|-----------------------|----------------------------------------|-----------------------|
| $\text{C}^a$                           | $\delta_{\text{H}}$ (mult, $J$ in Hz) | $\delta_{\text{C}}^b$ | $\delta_{\text{H}}$ (mult, $J$ in Hz)  | $\delta_{\text{C}}^b$ |
| 1                                      |                                       | 164.3, C              |                                        | 165.0, C              |
| 2                                      | 5.72, dd (1.5, 9.9)                   | 80.4, CH              | 5.67, dd (1.9, 9.9)                    | 81.3, CH              |
| 3                                      | 4.91, d (9.9)                         | 121.7, CH             | 4.95, d (9.9)                          | 120.4, CH             |
| 4                                      |                                       | 146.6, C              |                                        | 147.6, C              |
| 5                                      | a 2.41, m<br>b 2.30, m                | 39.5, $\text{CH}_2$   | a 2.41, m<br>b 2.22, m                 | 40.5, $\text{CH}_2$   |
| 6                                      | a 2.57, m<br>b 2.18, m                | 25.2, $\text{CH}_2$   | a 2.42, m<br>b 2.32, m                 | 25.5, $\text{CH}_2$   |
| 7                                      | 5.10, br d (9.6)                      | 126.4, CH             | 5.15, m                                | 126.2, CH             |
| 8                                      |                                       | 134.8, C              |                                        | 135.0, C              |
| 9                                      | a 2.36, m<br>b 2.12, m                | 37.6, $\text{CH}_2$   | a 2.27, m<br>b 2.17, m                 | 37.9, $\text{CH}_2$   |
| 10                                     | a 2.14, m<br>b 1.34, m                | 24.6, $\text{CH}_2$   | a 1.93, m<br>b 1.55, m                 | 25.1, $\text{CH}_2$   |
| 11                                     | 2.61, dd (2.5, 11.0)                  | 63.6, CH              | 2.86, dd (3.5, 8.8)                    | 62.8, CH              |
| 12                                     |                                       | 62.7, C               |                                        | 62.3, C               |
| 13                                     | a 2.12, m<br>b 1.13, m                | 38.0, $\text{CH}_2$   | a 2.21, m<br>b 1.42, m                 | 35.6, $\text{CH}_2$   |
| 14                                     | a 2.72, m<br>b 2.16, m                | 24.8, $\text{CH}_2$   | a 2.44, m<br>b 2.21, m                 | 23.5, $\text{CH}_2$   |
| 15                                     |                                       | 123.9, C              |                                        | 123.9, C              |
| 16                                     |                                       | 177.2, C              |                                        | 177.3, C              |
| 17                                     | 1.87, br s                            | 8.5, $\text{CH}_3$    | 1.85, br s                             | 9.0, $\text{CH}_3$    |
| 18                                     | 1.78, br s                            | 15.2, $\text{CH}_3$   | 1.91, br s                             | 15.8, $\text{CH}_3$   |
| 19                                     | 1.76, br s                            | 14.8, $\text{CH}_3$   | 1.71, br s                             | 15.3, $\text{CH}_3$   |
| 20                                     | 1.37, s                               | 15.9, $\text{CH}_3$   | 1.31, s                                | 17.5, $\text{CH}_3$   |

<sup>a</sup> All assignments are based on extensive 1D and 2D NMR measurements (COSY, HSQC, HMBC).

<sup>b</sup> Multiplicities determined by DEPT.

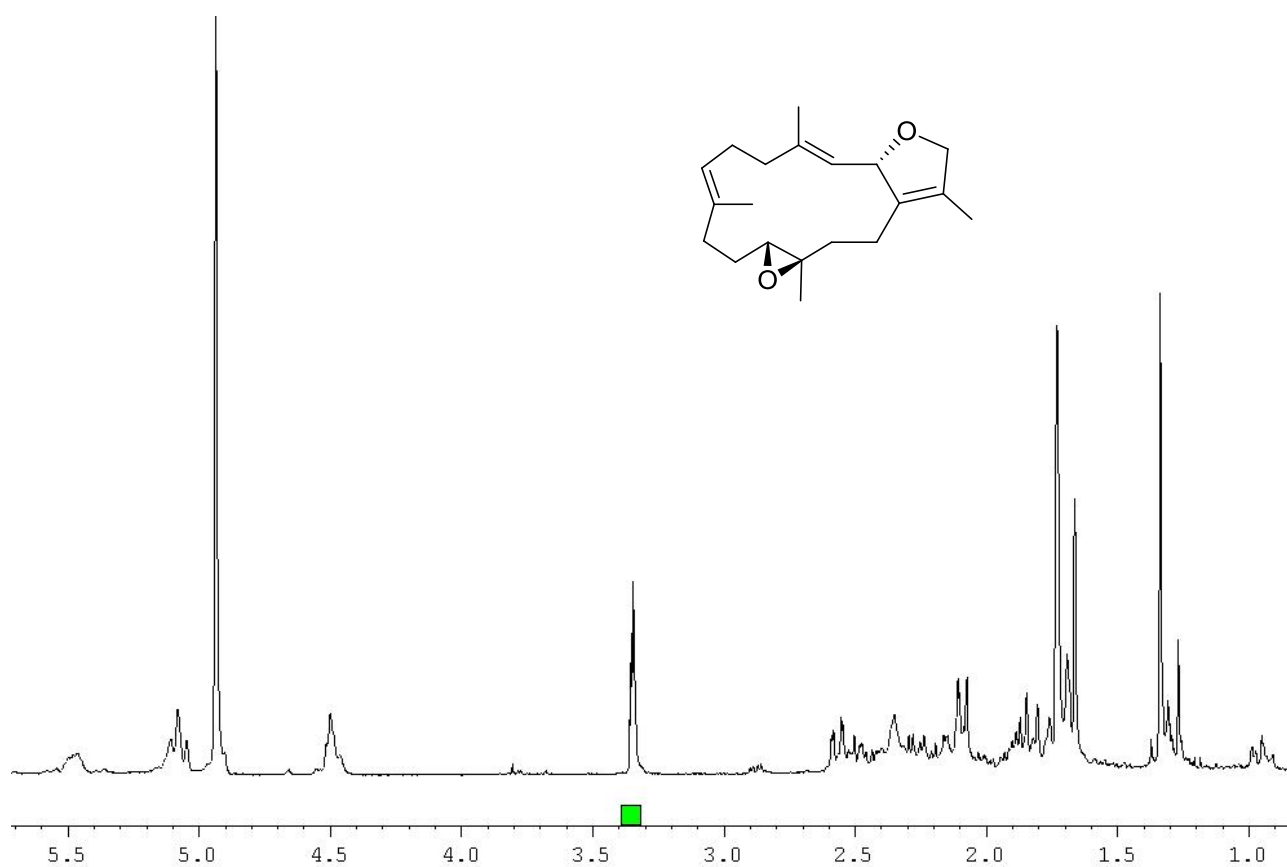

**Figure S28.**  $^1\text{H}$  NMR spectrum of (2*S*)-isosarcophytoxide (10) in  $\text{MeOH-}d_4$

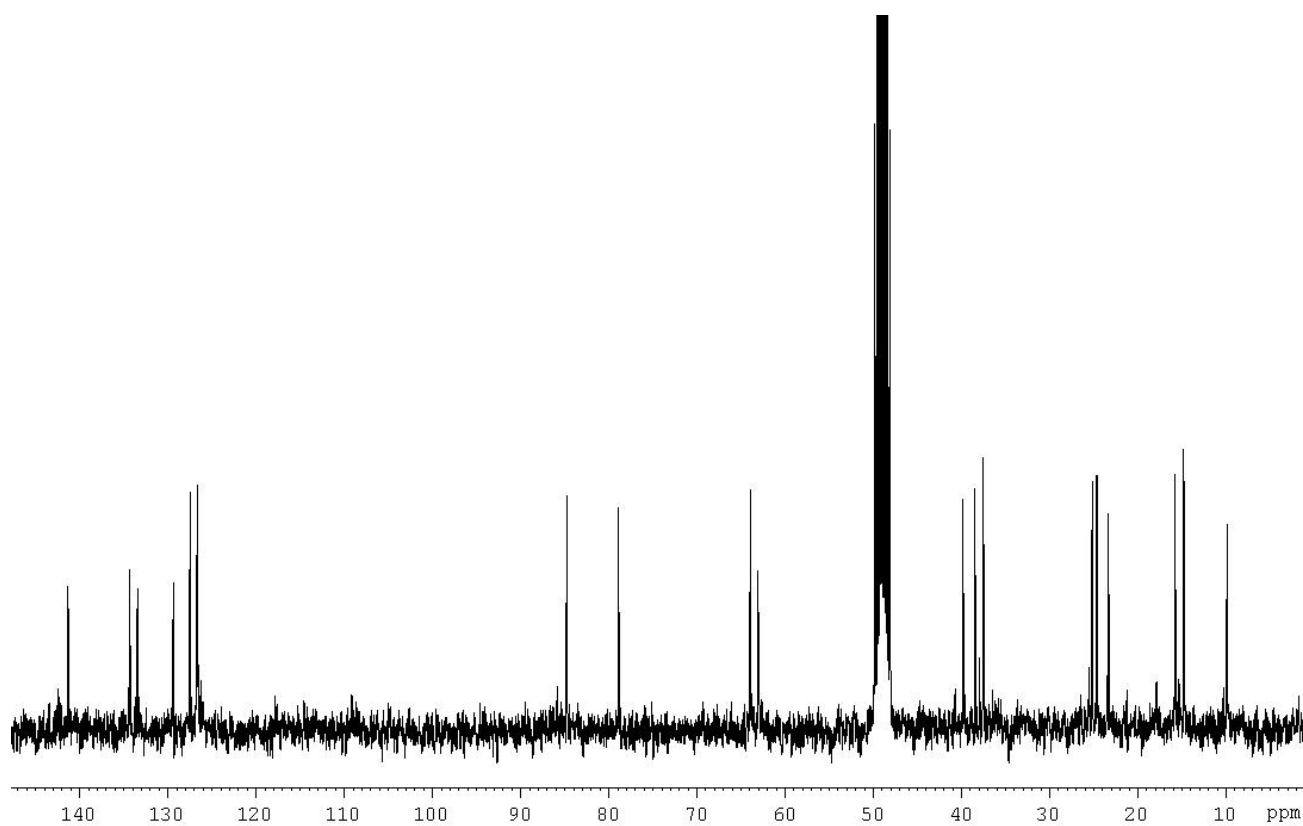

**Figure S29.**  $^{13}\text{C}$  NMR spectrum of (2*S*)-isosarcophytoxide (10) in  $\text{MeOH-}d_4$

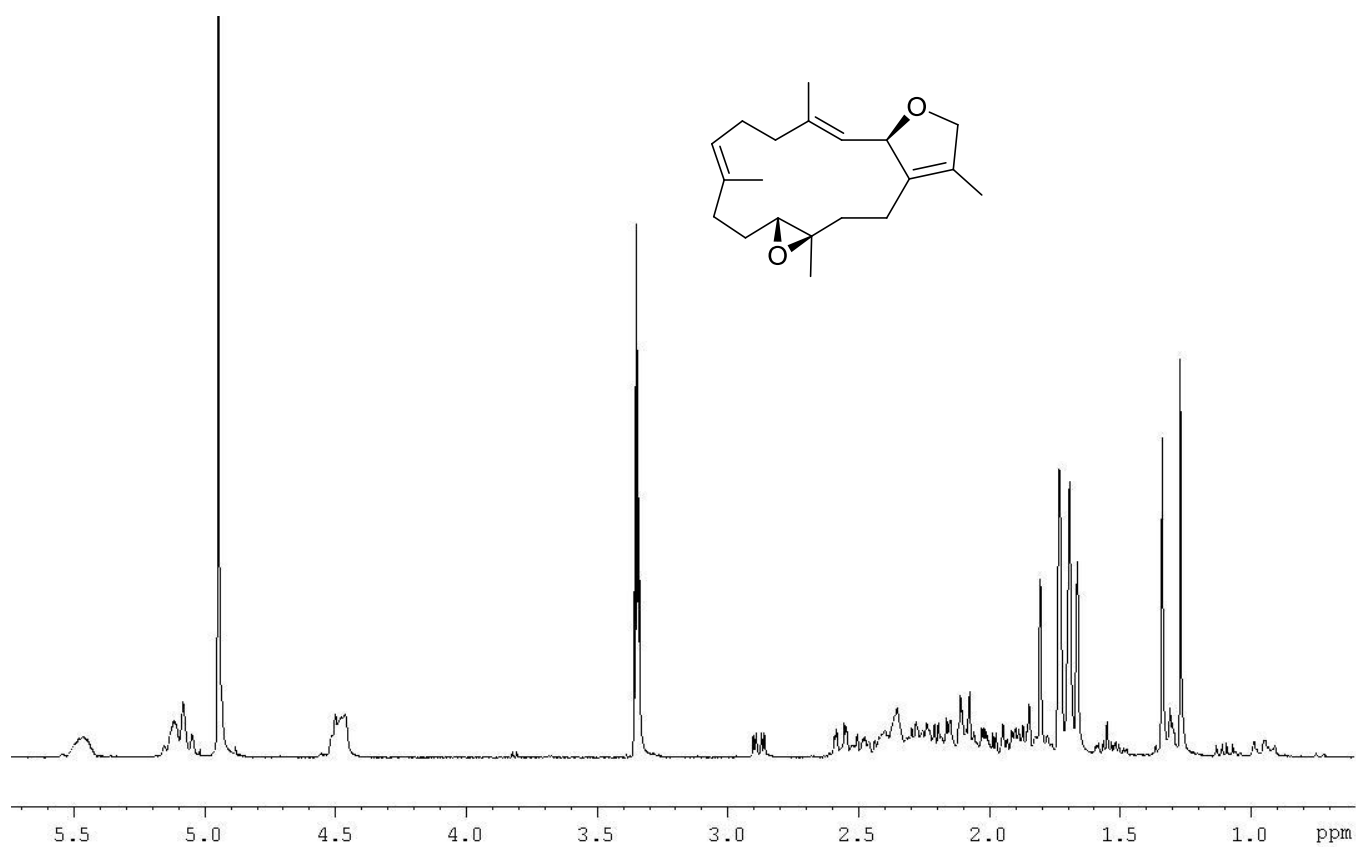

**Figure S30.**  $^1\text{H}$  NMR spectrum of (2R)-isosarcophytoxide (11) in  $\text{MeOH-}d_4$

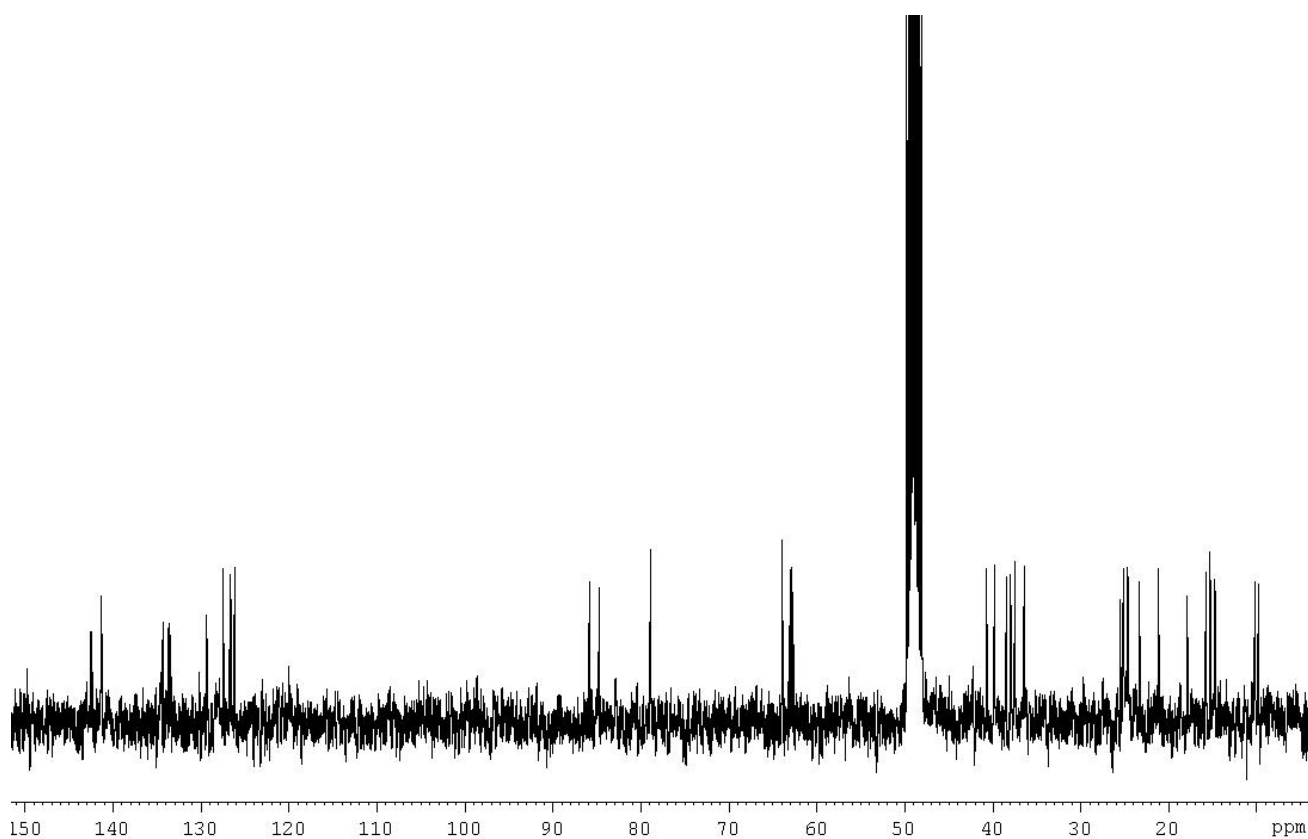

**Figure S31.**  $^{13}\text{C}$  NMR spectrum of (2R)-isosarcophytoxide (11) in  $\text{MeOH-}d_4$

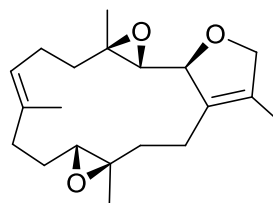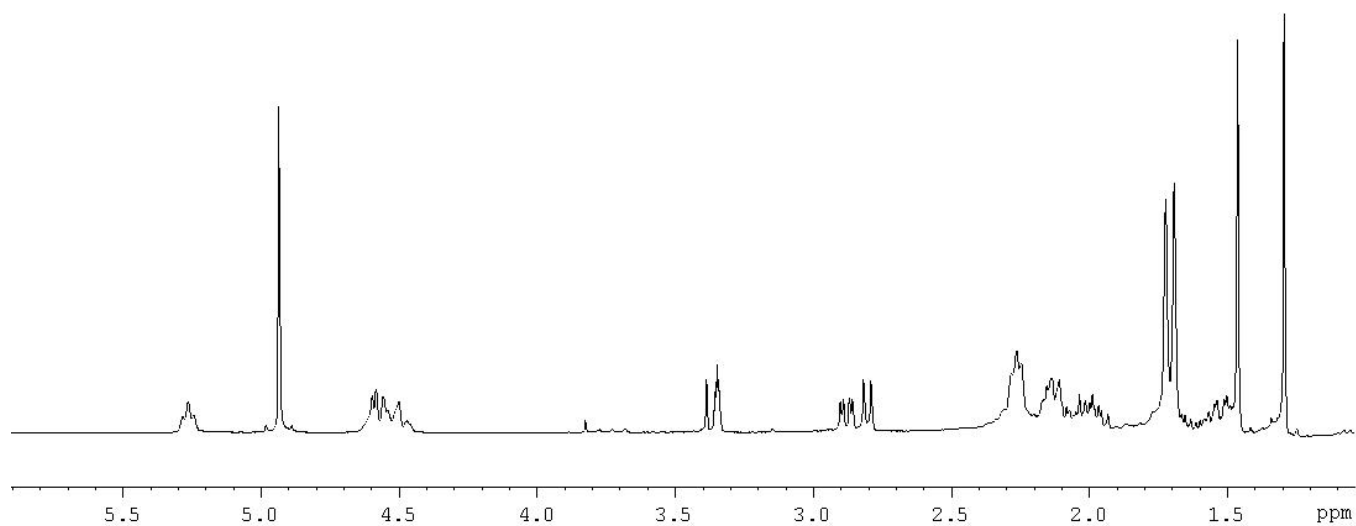

**Figure S32.**  $^1\text{H}$  NMR spectrum of  $2S,3R,4R,11R,12R$ -isosarcophytobisepoxide (**12**) in  $\text{MeOH-}d_4$

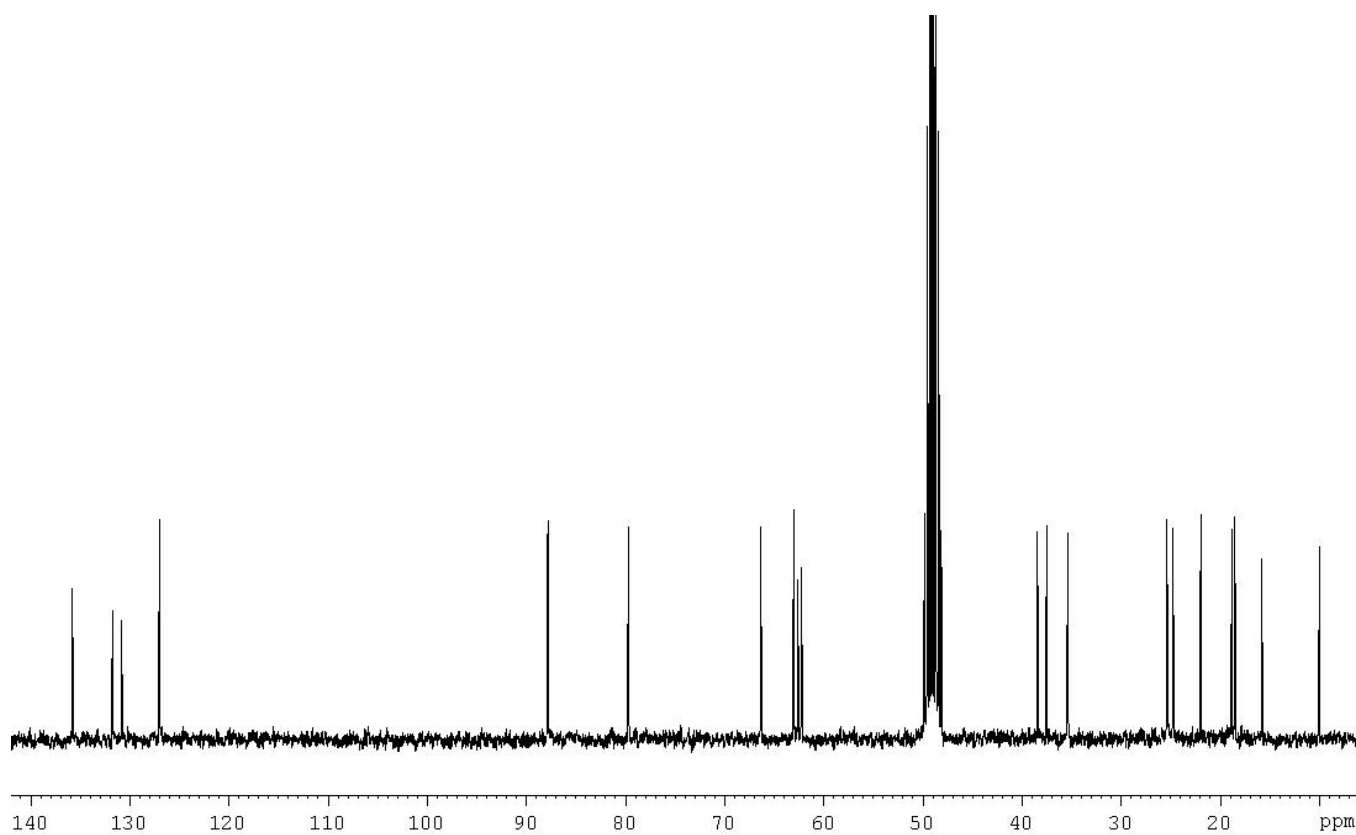

**Figure S33.**  $^{13}\text{C}$  NMR spectrum of  $2S,3R,4R,11R,12R$ -isosarcophytobisepoxide (**12**) in  $\text{MeOH-}d_4$

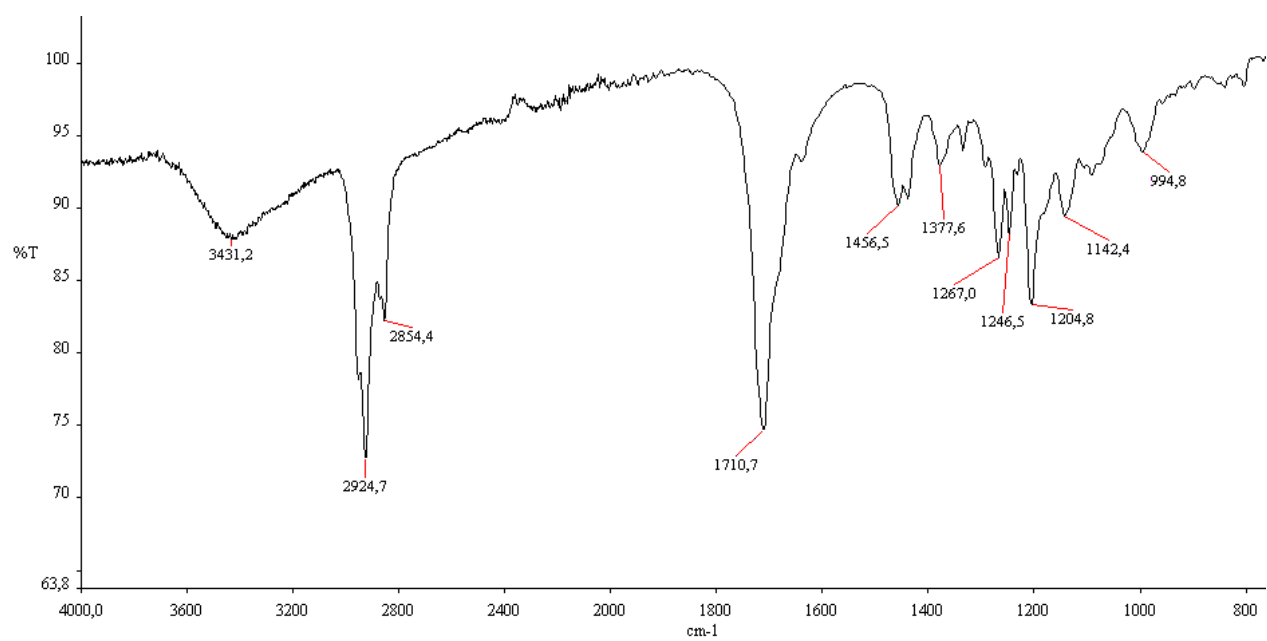

**Figure S34.** IR spectrum of *2S,3R,4R,11R,12R*-isosarcophytobisepoxide (**12**)

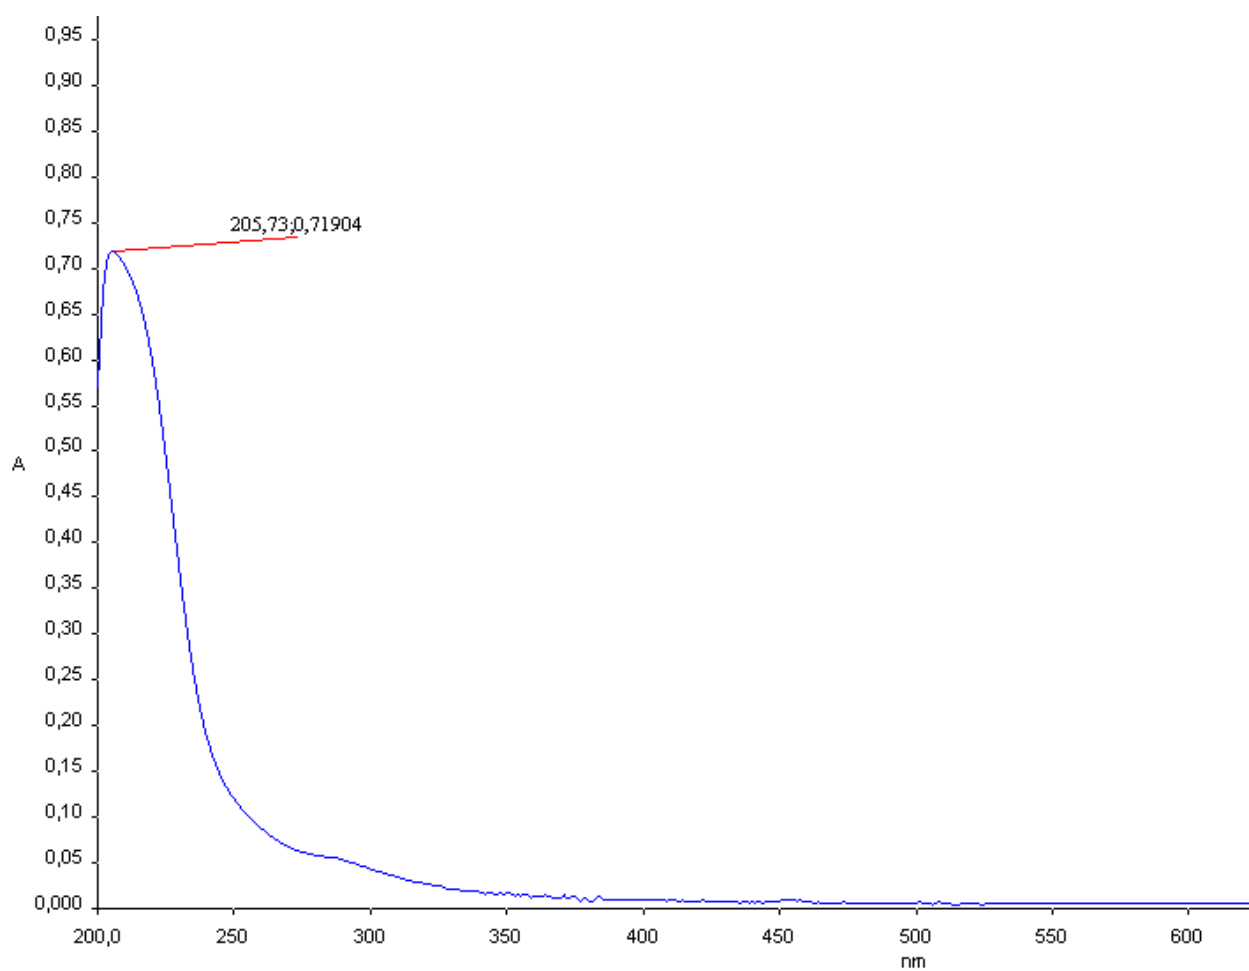

**Figure S35.** UV spectrum of *2S,3R,4R,11R,12R*-isosarcophytobisepoxide (**12**) in MeOH



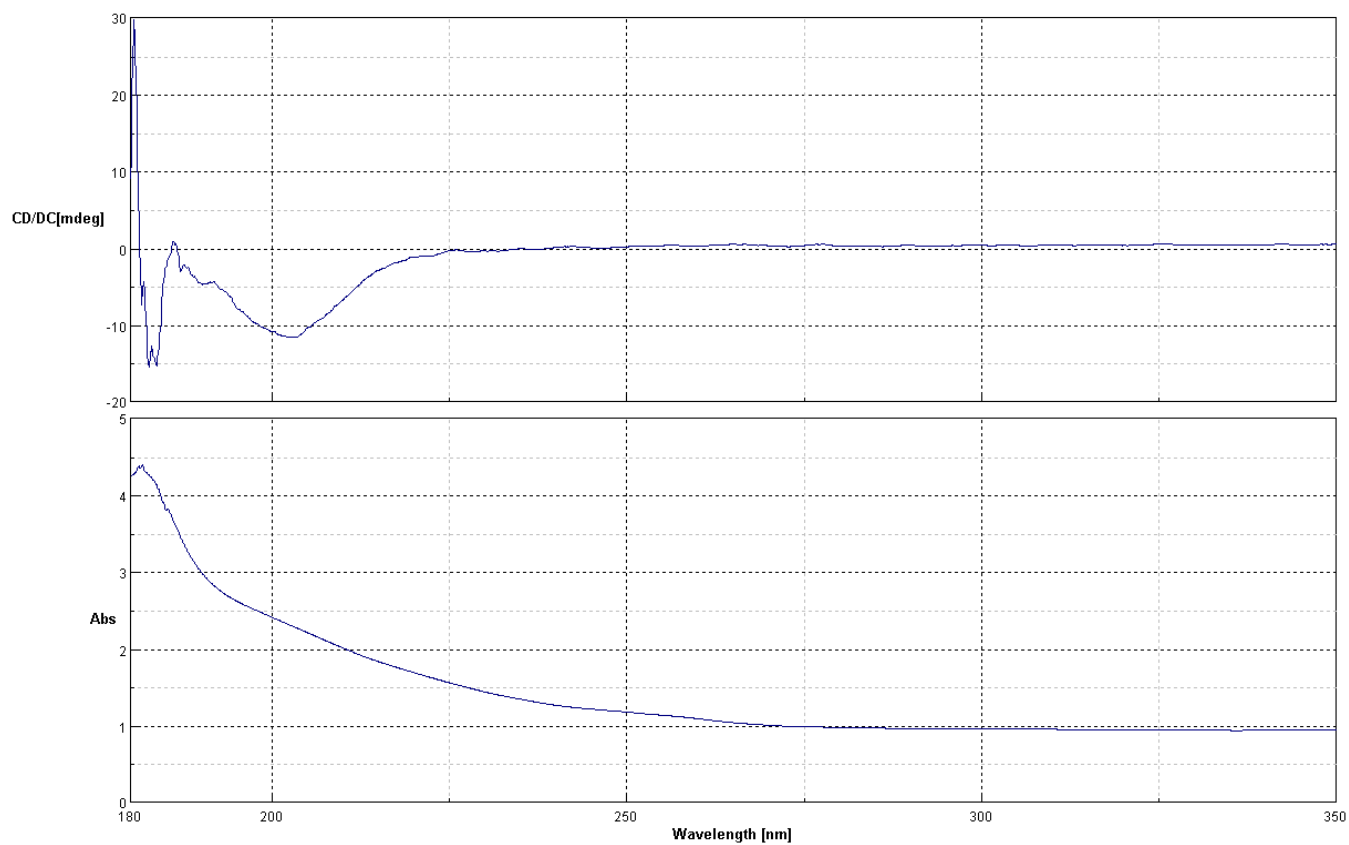

**Figure S36.** ECD spectrum of 2*S*,3*R*,4*R*,11*R*,12*R*-isosarcophytobisepoxide (**12**) in acetonitrile (*c* 0.01 mg/ml)

**Table S4.** NMR Data of 2*S*,3*R*,4*R*,11*R*,12*R*-isosarcophytobisepoxide (**12**) in MeOH-*d*<sub>4</sub>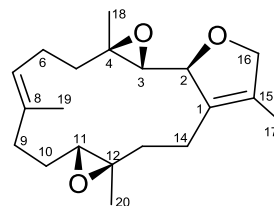

| C <sup>a</sup> | $\delta_{\text{H}}$ (mult, <i>J</i> in Hz) | $\delta_{\text{C}}$ <sup>b</sup> | COSY                                                             | HMBC                             | NOESY                                                               |
|----------------|--------------------------------------------|----------------------------------|------------------------------------------------------------------|----------------------------------|---------------------------------------------------------------------|
| 1              |                                            | 130.9, C                         |                                                                  |                                  |                                                                     |
| 2              | 4.59, d (8.0)                              | 87.9, CH                         |                                                                  |                                  | H-3, H <sub>3</sub> -18,                                            |
| 3              | 2.81, d (8.0)                              | 66.4, CH                         | H-5                                                              | C-2, C-4, C-5, C-18              | H-2, H-7, H-16a, H <sub>3</sub> -18                                 |
| 4              |                                            | 62.3, C                          |                                                                  |                                  |                                                                     |
| 5              | a 2.12, m<br>b 1.49, m                     | 38.4, CH <sub>2</sub>            | H-5b, H <sub>2</sub> -6<br>H-5a, H <sub>2</sub> -6               | C-18<br>C-18                     |                                                                     |
| 6              | 2.27, m                                    | 24.8, CH <sub>2</sub>            | H <sub>2</sub> -5, H-7                                           | C-4, C-5, C-7, C-8               |                                                                     |
| 7              | 5.26, t (6.2)                              | 127.1, CH                        | H <sub>2</sub> -6, H <sub>3</sub> -19                            |                                  | H-3, H <sub>2</sub> -6, H <sub>2</sub> -9, H <sub>3</sub> -18       |
| 8              |                                            | 135.8, C                         |                                                                  |                                  |                                                                     |
| 9              | 2.26, m                                    | 37.5, CH <sub>2</sub>            | H <sub>2</sub> -6                                                |                                  |                                                                     |
| 10             | 2.03, m<br>1.56, m                         | 25.4, CH <sub>2</sub>            | H <sub>2</sub> -9, H-10b, H-11<br>H <sub>2</sub> -9, H-10a, H-11 |                                  |                                                                     |
| 11             | 2.88, dd (3.3, 9.9)                        | 63.1, CH                         | H <sub>2</sub> -10                                               |                                  | H-7, H <sub>3</sub> -19, H <sub>3</sub> -20                         |
| 12             |                                            | 62.6, C                          |                                                                  |                                  |                                                                     |
| 13             | a 1.98, m<br>b 1.69, m                     | 35.4, CH <sub>2</sub>            | H-13a, H <sub>2</sub> -14<br>H-13b, H <sub>2</sub> -14           | C-1, C-14                        |                                                                     |
| 14             | 2.13, m                                    | 22.0, CH <sub>2</sub>            | H <sub>2</sub> -13                                               | C-1, C-2, C-13, C-15             |                                                                     |
| 15             |                                            | 131.8, C                         |                                                                  |                                  |                                                                     |
| 16             | a 4.56, m<br>b 4.50, m                     | 79.7, CH <sub>2</sub>            | H-15, H-16b<br>H-15, H-16a                                       | C-1, C-3, C-15<br>C-1, C-3, C-15 | H-2<br>H <sub>3</sub> -17                                           |
| 17             | 1.72, br s                                 | 10.0, CH <sub>3</sub>            | H-15                                                             | C-1, C-15, C-16                  |                                                                     |
| 18             | 1.46, s                                    | 18.5, CH <sub>3</sub>            |                                                                  | C-3, C-4, C-5                    |                                                                     |
| 19             | 1.69, br s                                 | 15.8, CH <sub>3</sub>            |                                                                  | C-7, C-8, C-9                    |                                                                     |
| 20             | 1.30, s                                    | 18.8, CH <sub>3</sub>            | H-11                                                             | C-11, C-12, C-13                 | H <sub>2</sub> -10, H-11(w), H <sub>2</sub> -13, H <sub>2</sub> -14 |

<sup>a</sup> All assignments are based on extensive 1D and 2D NMR measurements (COSY, HSQC, HMBC).

<sup>b</sup> Multiplicities determined by DEPT.

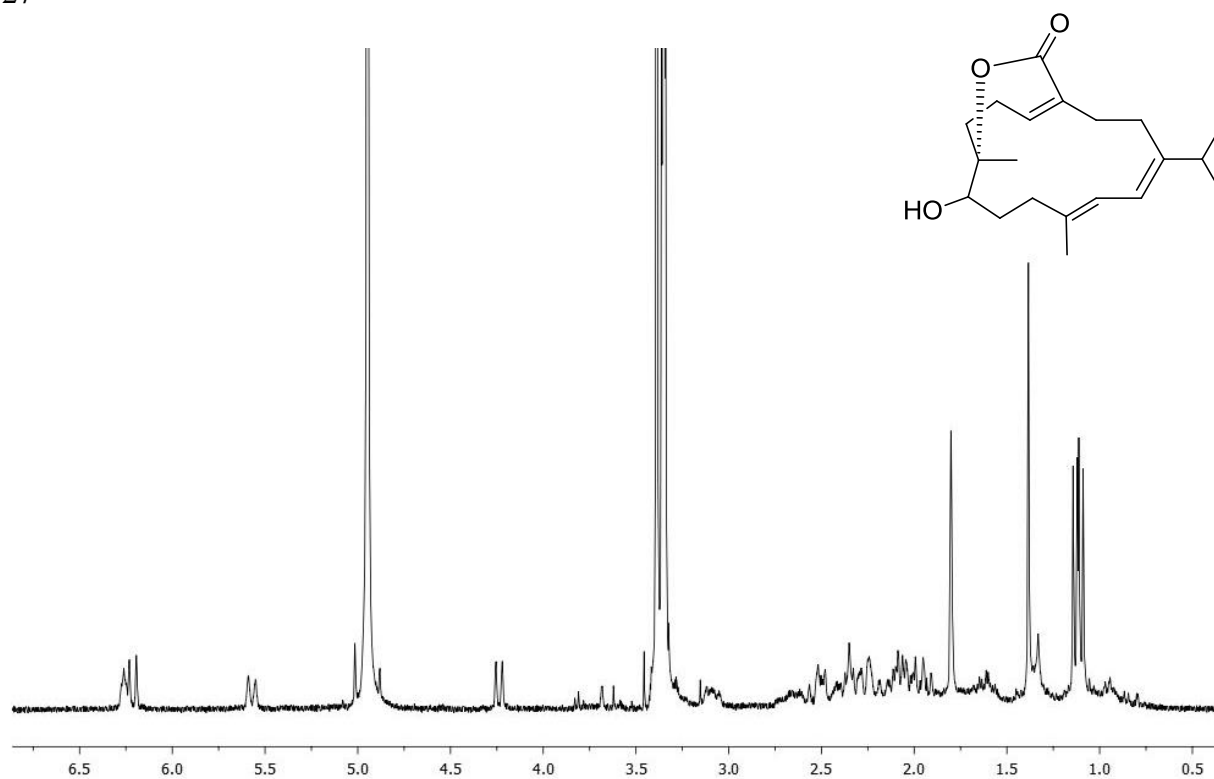

**Figure S37.**  $^1\text{H}$  NMR spectrum of cembranoid (**13**) in  $\text{MeOH-}d_4$

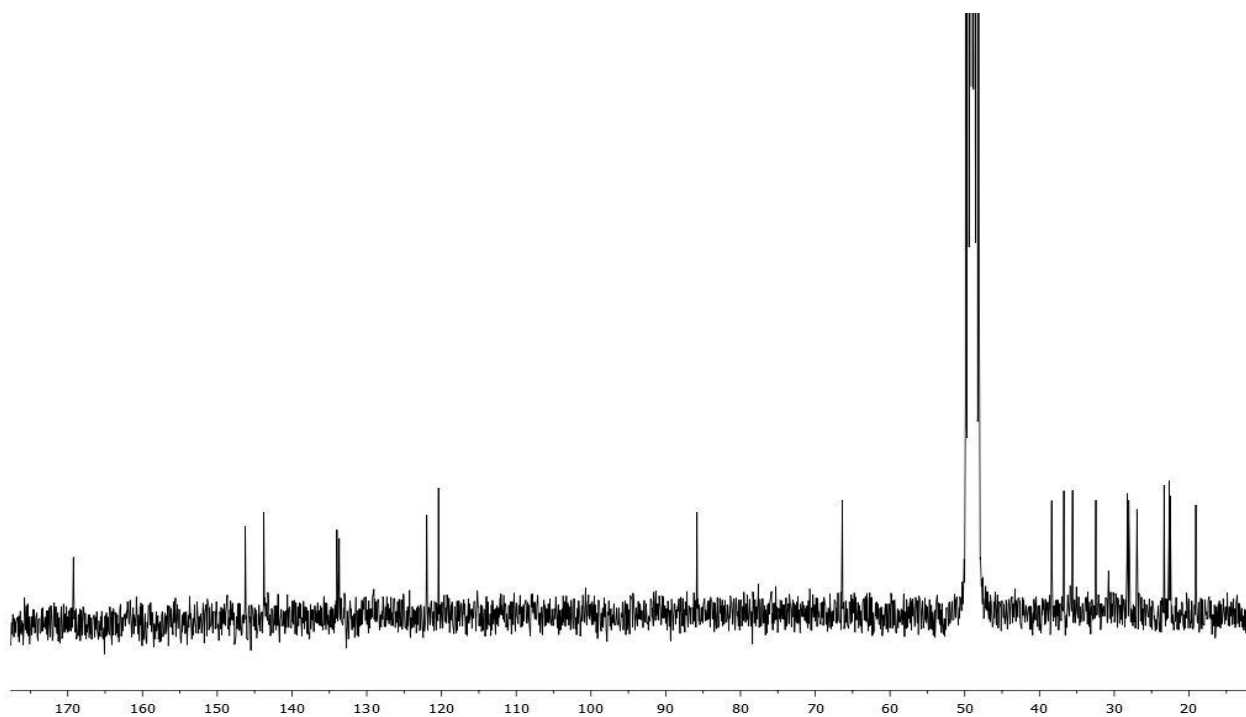

**Figure S38.**  $^{13}\text{C}$  NMR spectrum of cembranoid (**13**) in  $\text{MeOH-}d_4$

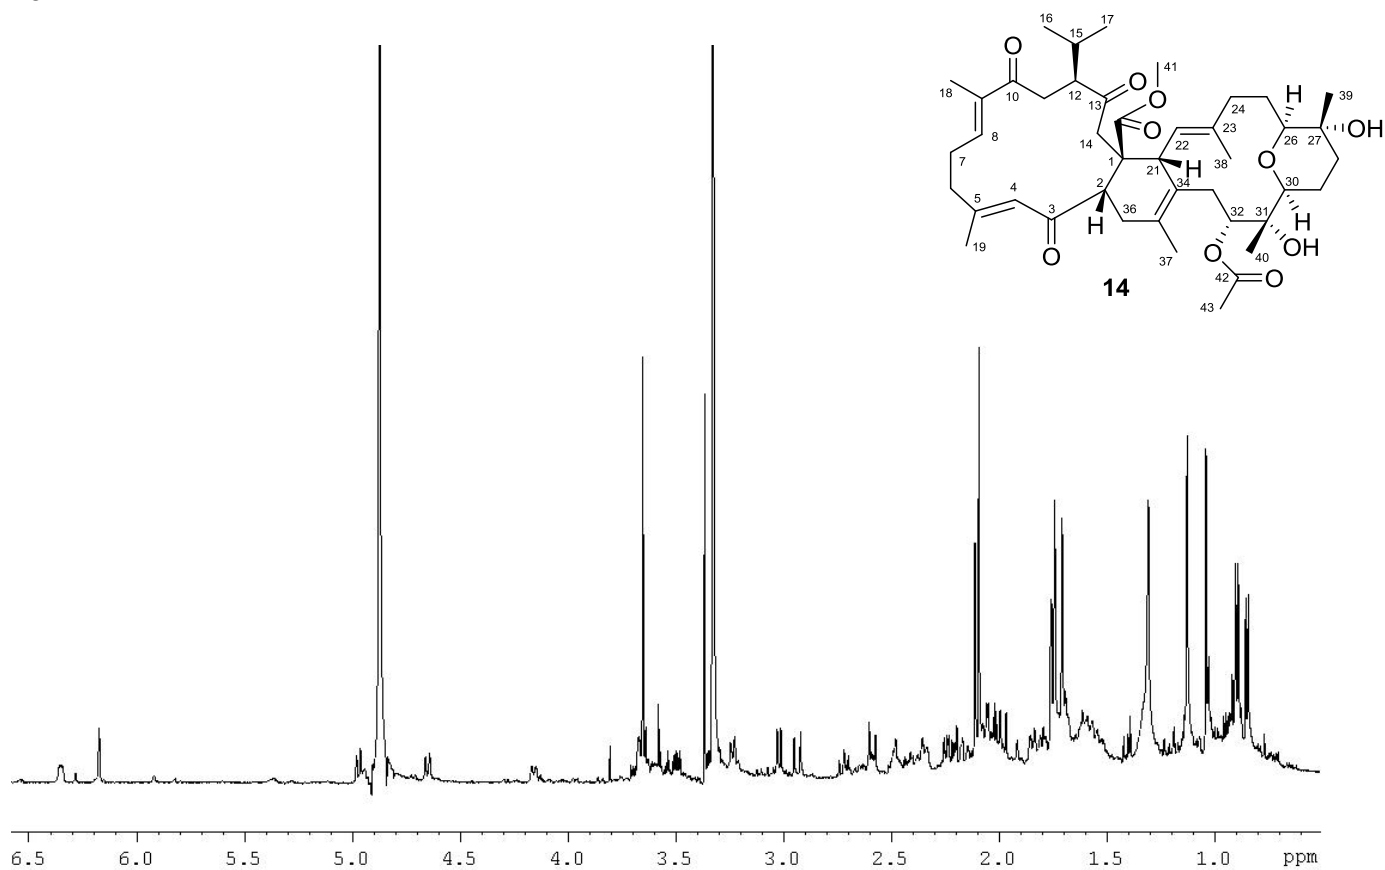

**Figure S39.**  $^1\text{H}$  NMR spectrum of isobisglaucumlide B (**14**) in  $\text{MeOH-}d_4$

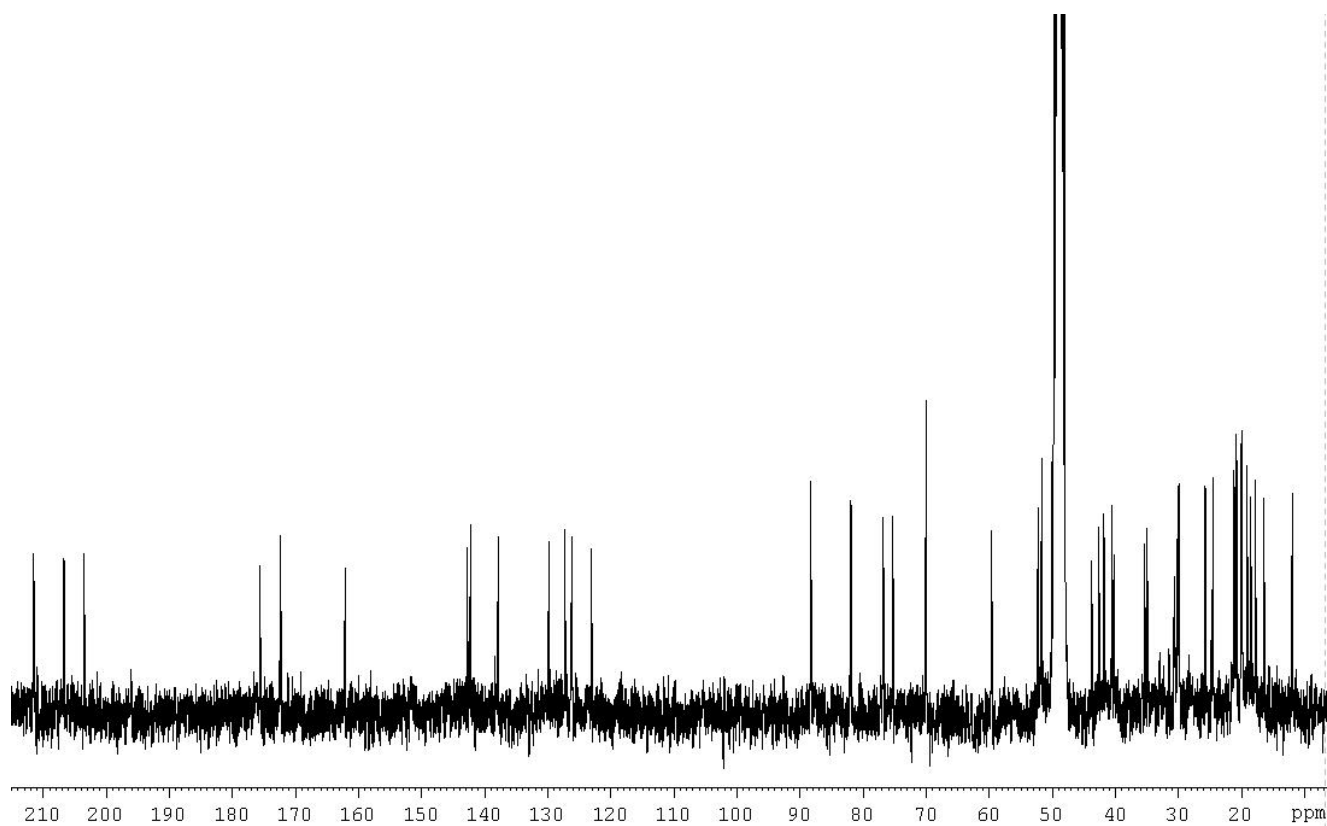

**Figure S40.**  $^{13}\text{C}$  NMR spectrum of isobisglaucumlide B (**14**) in  $\text{MeOH-}d_4$

**Table S5.** NMR data of isobisglaucumlide B (**14**) in MeOH-*d*<sub>4</sub>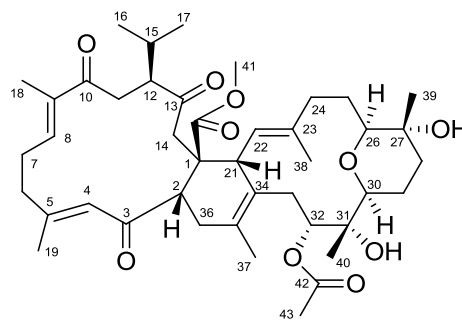

| C <sup>a</sup> | $\delta_{\text{H}}$ (mult., <i>J</i> in Hz) | $\delta_{\text{C}}$ <sup>b</sup> | COSY                                                | HMBC                                       | ROESY                         |
|----------------|---------------------------------------------|----------------------------------|-----------------------------------------------------|--------------------------------------------|-------------------------------|
| 1              |                                             | 50.2, C                          |                                                     |                                            |                               |
| 2              | 3.50, m                                     | 52.4, CH                         | H-36 a                                              | C-4                                        | H-4, H-21, H <sub>3</sub> -41 |
| 3              |                                             | 203.5, C                         |                                                     |                                            |                               |
| 4              | 6.18, s                                     | 126.3, CH                        | H <sub>3</sub> -19                                  | C-6                                        | H-2, H <sub>3</sub> -19       |
| 5              |                                             | 162.3, C                         |                                                     |                                            |                               |
| 6              | a 2.48, m<br>b 2.42, m                      | 40.3, CH <sub>2</sub>            |                                                     | C-4, C-8, C-19<br>C-4, C-8, C-19           |                               |
| 7              | a 2.64, m<br>b 2.49, m                      | 25.9, CH <sub>2</sub>            | H-7b, H-8<br>H-7a, H-8                              | C-5<br>C-5                                 | H-6b, H <sub>3</sub> -18      |
| 8              | 6.36, br dd (7.0, 13.0)                     | 142.4, CH                        | H <sub>2</sub> -7, H <sub>3</sub> -18               |                                            | H-11a                         |
| 9              |                                             | 138.0, C                         |                                                     |                                            |                               |
| 10             |                                             | 206.9, C                         |                                                     |                                            |                               |
| 11             | a 3.35, dd (7.5, 20.0)<br>b 2.24, m         | 35.5, CH <sub>2</sub>            | H-11b, H-12<br>H-11a, H-12                          | C-9, C-13, C-15<br>C-9, C-13, C-15         | H-8, H-14 a                   |
| 12             | 2.60, br dd (6.9, 18.0)                     | 59.7, CH                         | H <sub>2</sub> -11, H-14a                           | C-10, C-15, C-16, C-17                     |                               |
| 13             |                                             | 211.6, C                         |                                                     |                                            |                               |
| 14             | a 2.94, d (18.0)<br>b 2.59, dd (7.0, 18.2)  | 43.9, CH <sub>2</sub>            | H-12, H-14b<br>H-14a                                | C-20, C-21, C-41<br>C-2, C-15, C-20, C-21, | H-11a                         |
| 15             | 2.26, m                                     | 30.0, CH                         | H-11a, H-12, H <sub>3</sub> -16, H <sub>3</sub> -17 | C-11, C-16, C-17                           |                               |
| 16             | 0.86, d (7.0)                               | 18.0, CH <sub>3</sub>            |                                                     | C-12, C-15, C-17                           |                               |
| 17             | 0.90, d (7.0)                               | 21.3, CH <sub>3</sub>            |                                                     | C-12, C-15, C-16                           | H-12                          |
| 18             | 1.74, s                                     | 12.1, CH <sub>3</sub>            |                                                     | C-8, C-9, C-10                             |                               |
| 19             | 2.12, s                                     | 18.6, CH <sub>3</sub>            |                                                     | C-4, C-5, C-6                              | H-4                           |
| 20             |                                             | 175.7, C                         |                                                     |                                            |                               |
| 21             | 4.16, d (11.4)                              | 42.7, CH                         | H-22, H <sub>3</sub> -37                            |                                            | H-2, H-32, H <sub>3</sub> -38 |
| 22             | 4.65, d (11.4)                              | 123.2, CH                        | H-21, H-24a, H <sub>3</sub> -38                     | C-24, C-34, C-38                           | H-24b                         |
| 23             |                                             | 142.9, C                         |                                                     |                                            |                               |
| 24             | a 2.35, m<br>b 2.07, m                      | 41.9, CH <sub>2</sub>            | H-24b<br>H-24a                                      | C-22<br>C-22                               |                               |
| 25             | a 1.81, m<br>b 1.62, m                      | 25.8, CH <sub>2</sub>            | H-24a, H-25b<br>H-25a                               | C-27, C-30, C-39<br>C-27, C-30, C-39       |                               |
| 26             | 3.02, d (9.9)                               | 88.5, CH                         | H-25 b, H <sub>2</sub> -28b                         | C-24, C-30, C-39                           | H-28b, H-30                   |
| 27             |                                             | 70.1, C                          |                                                     |                                            |                               |
| 28             | a 1.85, m<br>b 1.60, m                      | 40.7, CH <sub>2</sub>            | H-28b<br>H-26, H-28a                                | C-30<br>C-26, C-30                         | H-29a                         |
| 29             | a 1.72, m<br>b 1.55, m                      | 24.6, CH <sub>2</sub>            | H-29b<br>H-29a, H-30                                |                                            |                               |
| 30             | 3.24, dd (2.0, 13.9)                        | 82.1, CH                         | H-29b                                               | C-31                                       | H-26                          |
| 31             |                                             | 75.4, C                          |                                                     |                                            |                               |
| 32             | 4.97, dd (2.0, 13.9)                        | 76.9, CH                         | H <sub>2</sub> -33                                  | C-34, C-42                                 | H-21, H <sub>3</sub> -40      |
| 33             | a 2.72, m<br>b 2.16, m                      | 30.2, CH <sub>2</sub>            | H-32, H-33b<br>H-32, H-33a                          | C-21, C-31, C-35<br>C-21, C-31, C-35       |                               |
| 34             |                                             | 127.4, C                         |                                                     |                                            |                               |
| 35             |                                             | 129.9, C                         |                                                     |                                            |                               |
| 36             | a 2.37, m<br>b 2.21, m                      | 35.1, CH <sub>2</sub>            | H-2<br>H-2                                          | C-1, C-34, C-37<br>C-34                    |                               |
| 37             | 1.76, s                                     | 20.3, CH <sub>3</sub>            |                                                     | C-34, C-35, C-36                           | H-33a, H <sub>2</sub> -36     |
| 38             | 1.71, s                                     | 16.6, CH <sub>3</sub>            |                                                     | C-22, C-23, C-24                           | H-21                          |
| 39             | 1.13, s                                     | 20.0, CH <sub>3</sub>            |                                                     | C-25, C-26, C-27, C-28                     | H-28b                         |
| 40             | 1.04, s                                     | 19.3, CH <sub>3</sub>            |                                                     | C-30, C-31, C-32                           | H-29b                         |
| 41             | 3.65, s                                     | 51.8, CH <sub>3</sub>            |                                                     | C-20                                       | H-4, H-2, H-14b               |
| 42             |                                             | 172.5, C                         |                                                     |                                            |                               |
| 43             | 2.10, s                                     | 20.9, CH <sub>3</sub>            |                                                     | C-32, C-42                                 |                               |

<sup>a</sup> All assignments are based on extensive 1D and 2D NMR measurements (COSY, HSQC, HMBC, ROESY).<sup>b</sup> Multiplicities determined by DEPT.

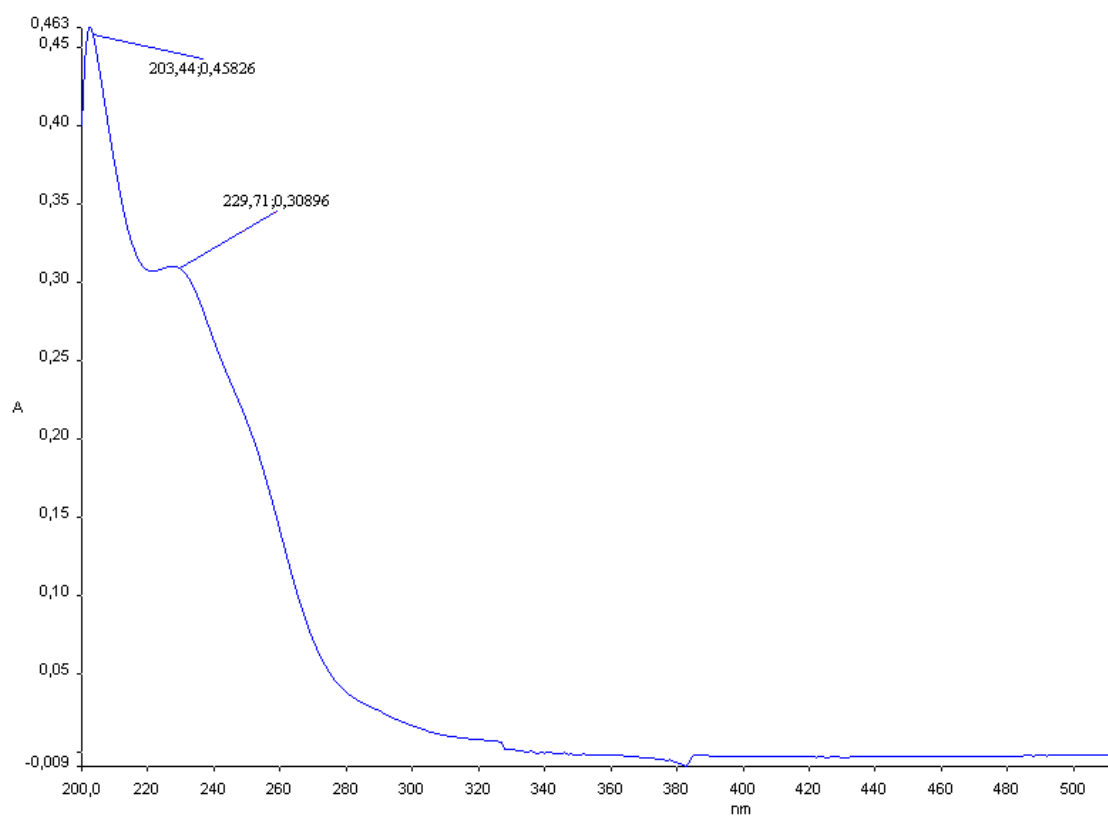

**Figure S41.** UV spectrum of isobisglaucumlide B (**14**) in MeOH

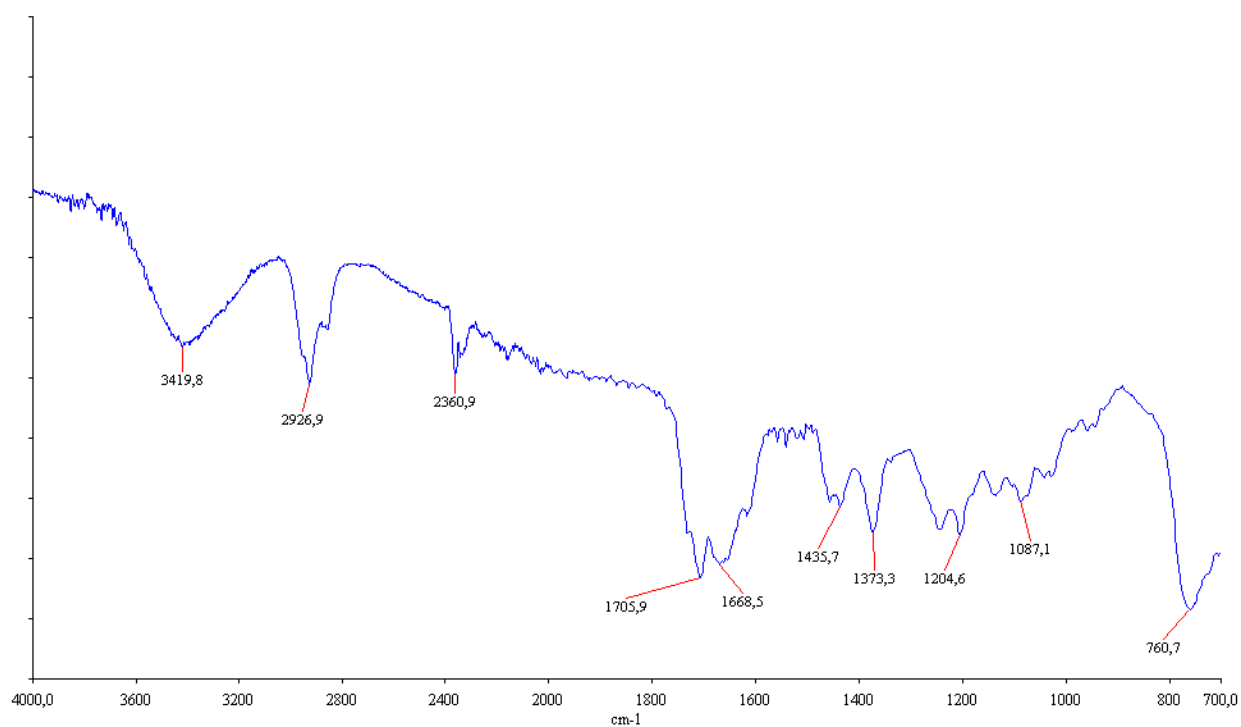

**Figure S42.** IR spectrum of isobisglaucumlide B (**14**)

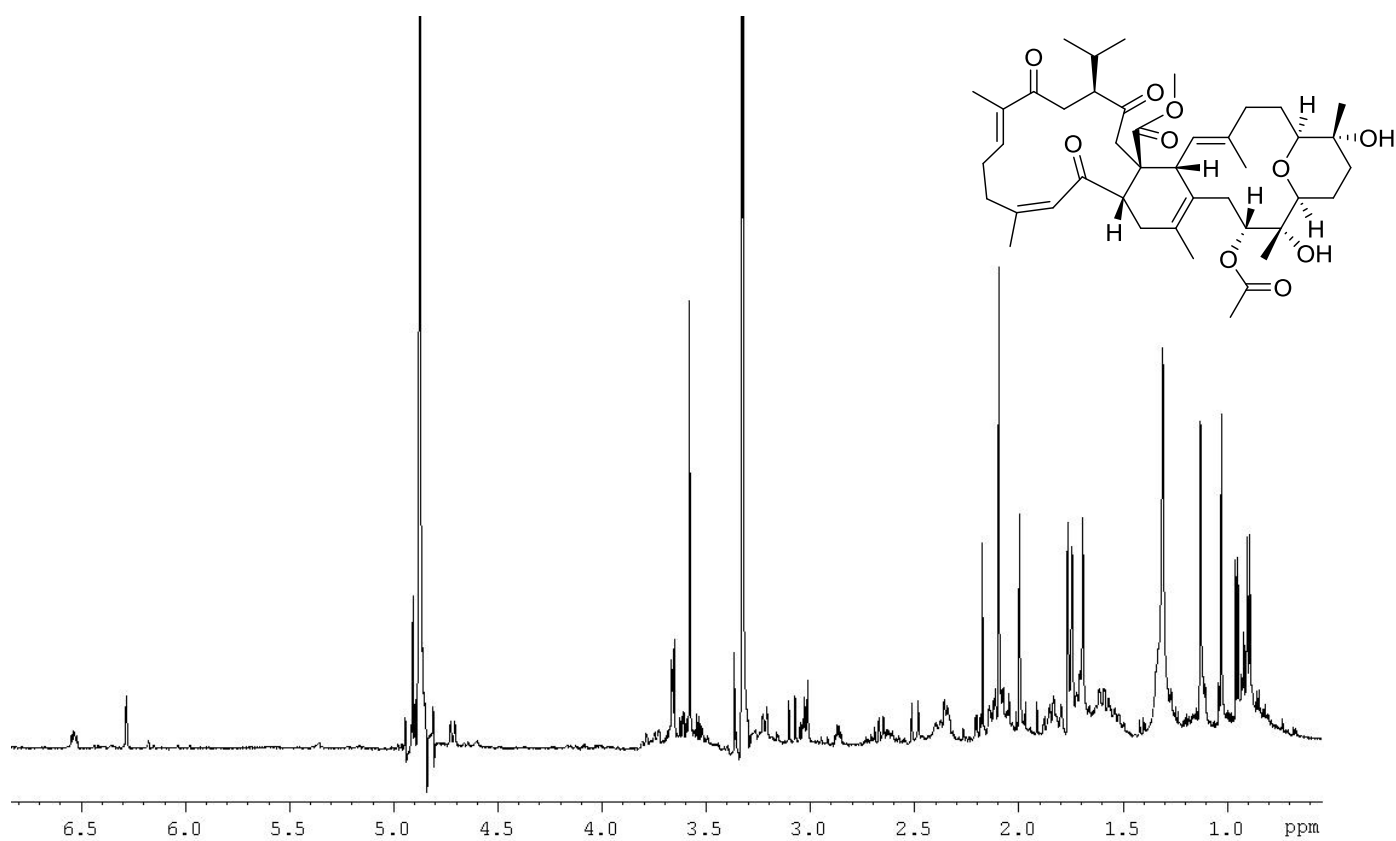

**Figure S43.**  $^1\text{H}$  NMR spectrum of isobisglaucumlide C (**15**) in  $\text{MeOH-}d_4$

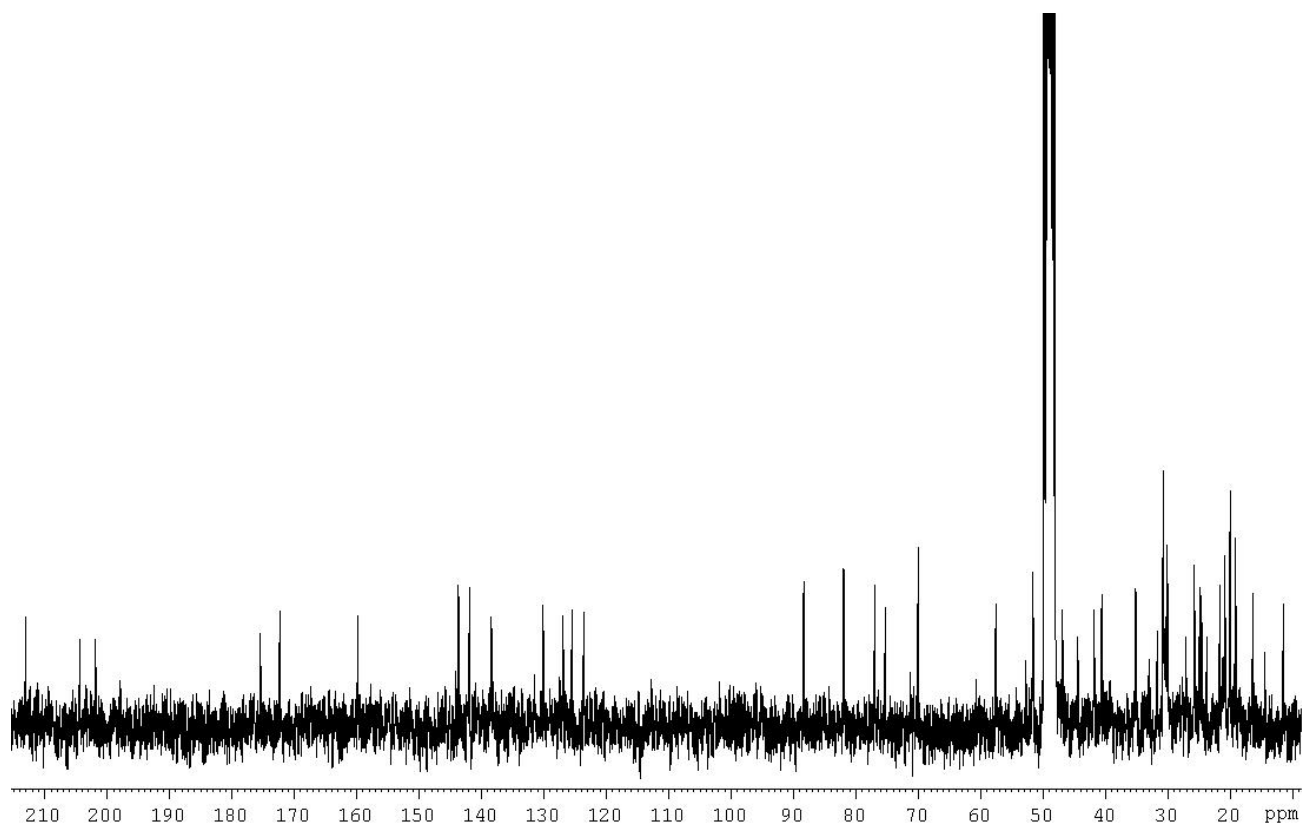

**Figure S44.**  $^{13}\text{C}$  NMR spectrum of isobisglaucumlide C (**15**) in  $\text{MeOH-}d_4$

**Table S6.** NMR data of isobisglaucumlide C (**15**) in MeOH-*d*<sub>4</sub>.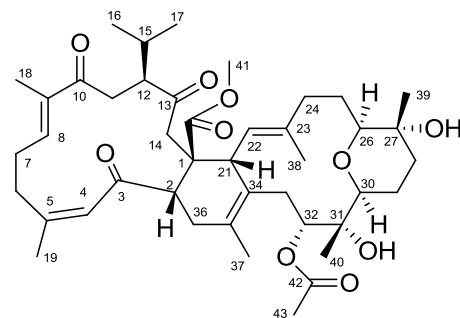

| C <sup>a</sup> | δ <sub>H</sub> (mult., <i>J</i> in Hz)     | δ <sub>C</sub> <sup>b</sup> | COSY                                     | HMBC                                                               | ROESY                         |
|----------------|--------------------------------------------|-----------------------------|------------------------------------------|--------------------------------------------------------------------|-------------------------------|
| 1              |                                            | 49.5, C                     |                                          |                                                                    |                               |
| 2              | 3.62, dd (8.1, 10.8)                       | 52.8, CH                    | H <sub>2</sub> -36                       | C-1, C-3, C-14 (w), C-20, C-36                                     | H-4, H-21, H <sub>3</sub> -41 |
| 3              |                                            | 202.0, C                    |                                          |                                                                    |                               |
| 4              | 6.29, s                                    | 125.6, CH                   | H <sub>3</sub> -19                       | C-3, C-5, C-6, C-19                                                | H-2, H <sub>3</sub> -19       |
| 5              |                                            | 159.9, C                    |                                          |                                                                    |                               |
| 6              | a 3.79, m<br>b 2.14, m                     | 31.7, CH <sub>2</sub>       | H-6b<br>H-6a, H-7a                       | C-4, C-5<br>C-4, C-5                                               |                               |
| 7              | a 2.65, m<br>b 2.41, m                     | 27.1, CH <sub>2</sub>       | H-7b<br>H-6a, H-7a, H-8                  | C-6, C-8, C-9<br>C-6, C-8, C-9                                     | H-6b, H <sub>3</sub> -18      |
| 8              | 6.54, m                                    | 143.8, CH                   | H-7a                                     |                                                                    | H-11a                         |
| 9              |                                            | 138.5, C                    |                                          |                                                                    |                               |
| 10             |                                            | 204.5, C                    |                                          |                                                                    |                               |
| 11             | a 3.04, m<br>b 2.19, m                     | 35.3, CH <sub>2</sub>       | H-11b, H-12<br>H-11a, H-12               | C-10, C-12, C-13, C-15<br>C-10, C-12, C-13, C-15, C-17             | H-8, H-14 a                   |
| 12             | 2.87, dd (6.4, 10.5)                       | 57.6, CH                    | H <sub>2</sub> -11                       | C-10, C-11, C-13, C-15, C-16, C-17                                 |                               |
| 13             |                                            | 213.0, C                    |                                          |                                                                    |                               |
| 14             | a 3.09, br d (18.0)<br>b 2.50, br d (18.0) | 46.9, CH <sub>2</sub>       | H-14b<br>H-14a                           | C-1, C-2, C-13, C-20, C-21, C-34 (w)<br>C-1, C-2, C-13, C-20, C-21 | H-11a                         |
| 15             | 2.13, m                                    | 30.2, CH                    |                                          |                                                                    |                               |
| 16             | 0.90, d (6.8)                              | 19.2, CH <sub>3</sub>       | H-15                                     | C-12, C-15, C-17                                                   |                               |
| 17             | 0.96, d (6.8)                              | 21.7, CH <sub>3</sub>       | H-15                                     | C-12, C-15, C-16                                                   | H-12                          |
| 18             | 1.78, s                                    | 11.5, CH <sub>3</sub>       | H-8                                      | C-8, C-9, C-10,                                                    |                               |
| 19             | 2.00, s                                    | 24.9, CH <sub>3</sub>       | H-4                                      | C-3 (w), C-4, C-5, C-6                                             | H-4                           |
| 20             |                                            | 175.5, C                    |                                          |                                                                    |                               |
| 21             | 3.75, m                                    | 44.5, CH                    | H-22, H <sub>3</sub> -37 (w)             |                                                                    | H-2, H <sub>3</sub> -38       |
| 22             | 4.72, d (11.7)                             | 123.7, CH                   | H-21, H <sub>3</sub> -38                 | C-24, C-38                                                         | H-24b                         |
| 23             |                                            | 142.0, C                    |                                          |                                                                    |                               |
| 24             | a 2.39, m<br>b 2.09, m                     | 41.8, CH <sub>2</sub>       | H-24b, H-25a<br>H-24a, H-25b             | C-22 (w), C-23, C-26 (w), C-38 (w)                                 |                               |
| 25             | a 1.81, m<br>b 1.61, m                     | 25.8, CH <sub>2</sub>       | H-24a, H-25b<br>H-25a, H-26              | C-23, C-24, C-26, C-27, C-30                                       |                               |
| 26             | 3.03, m                                    | 88.4, CH                    | H-25b, H-28b                             | C-24, C-25, C-27, C-28, C-30, C-39                                 | H-28b, H-30                   |
| 27             |                                            | 70.1, C                     |                                          |                                                                    |                               |
| 28             | a 1.85, m<br>b 1.60, m                     | 40.6, CH <sub>2</sub>       | H-28b, H <sub>2</sub> -29<br>H-26, H-28a | C-26, C-27, C-30, C-39<br>C-27, C-29                               | H-29a                         |
| 29             | a 1.72, m<br>b 1.54, m                     | 24.6, CH <sub>2</sub>       | H-29b<br>H-28a, H-29a, H-30              |                                                                    |                               |
| 30             | 3.23, m                                    | 82.0, CH                    | H-29b, H-33a (w), H <sub>3</sub> -38     | C-26 (w), C-28 (w), C-31, C-40                                     | H-26                          |
| 31             |                                            | 75.3, C                     |                                          |                                                                    |                               |
| 32             | 4.91, m                                    | 77.0, CH                    | H <sub>2</sub> -33                       | C-33 (w), C-34, C-40 (w), C-42                                     | H-21, H <sub>3</sub> -40      |
| 33             | a 2.69, m<br>b 2.25, m                     | 30.0, CH <sub>2</sub>       | H-32, H-33b<br>H-33a                     | C-21, C-31, C-32, C-34, C-35<br>C-34                               |                               |
| 34             |                                            | 127.0, C                    |                                          |                                                                    |                               |
| 35             |                                            | 130.2, C                    |                                          |                                                                    |                               |
| 36             | 2.36, m                                    | 35.1, CH <sub>2</sub>       | H-2                                      |                                                                    |                               |
| 37             | 1.75, s                                    | 20.2, CH <sub>3</sub>       | H-21                                     | C-34, C-35, C-36                                                   | H-33a, H <sub>2</sub> -36     |
| 38             | 1.70, s                                    | 16.4, CH <sub>3</sub>       | H-22                                     | C-22, C-23, C-24                                                   | H-21                          |
| 39             | 1.13, s                                    | 20.0, CH <sub>3</sub>       |                                          | C-26, C-27, C-28                                                   | H-28b                         |
| 40             | 1.03, s                                    | 19.2, CH <sub>3</sub>       |                                          | C-30, C-31, C-32                                                   | H-29b                         |
| 41             | 3.58, s                                    | 51.6, CH <sub>3</sub>       |                                          | C-20                                                               | H-4, H-2, H-14b               |
| 42             |                                            | 172.5, C                    |                                          |                                                                    |                               |
| 43             | 2.10, s                                    | 20.9, CH <sub>3</sub>       |                                          | C-32, C-42                                                         |                               |

<sup>a</sup> All assignments are based on extensive 1D and 2D NMR measurements (COSY, HSQC, HMBC, ROESY).

<sup>b</sup> Multiplicities determined by DEPT.



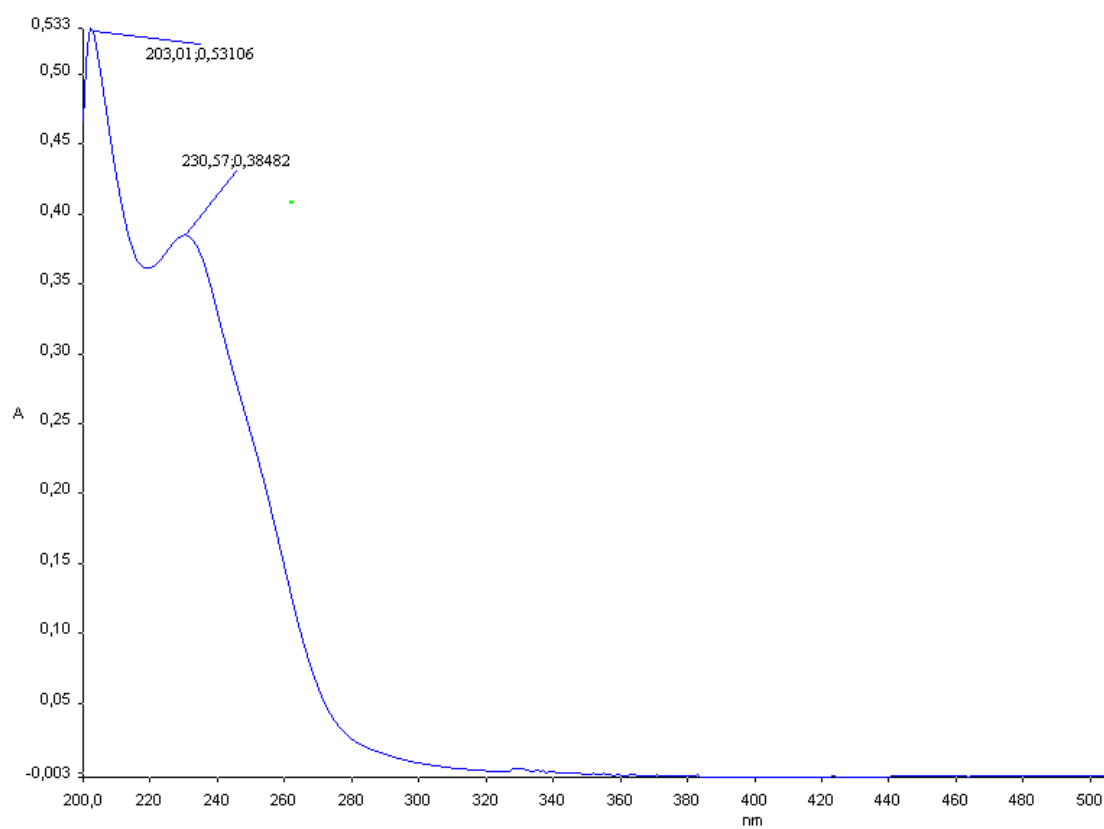

**Figure S45.** UV spectrum of isobisglaucumlide C (15) in MeOH

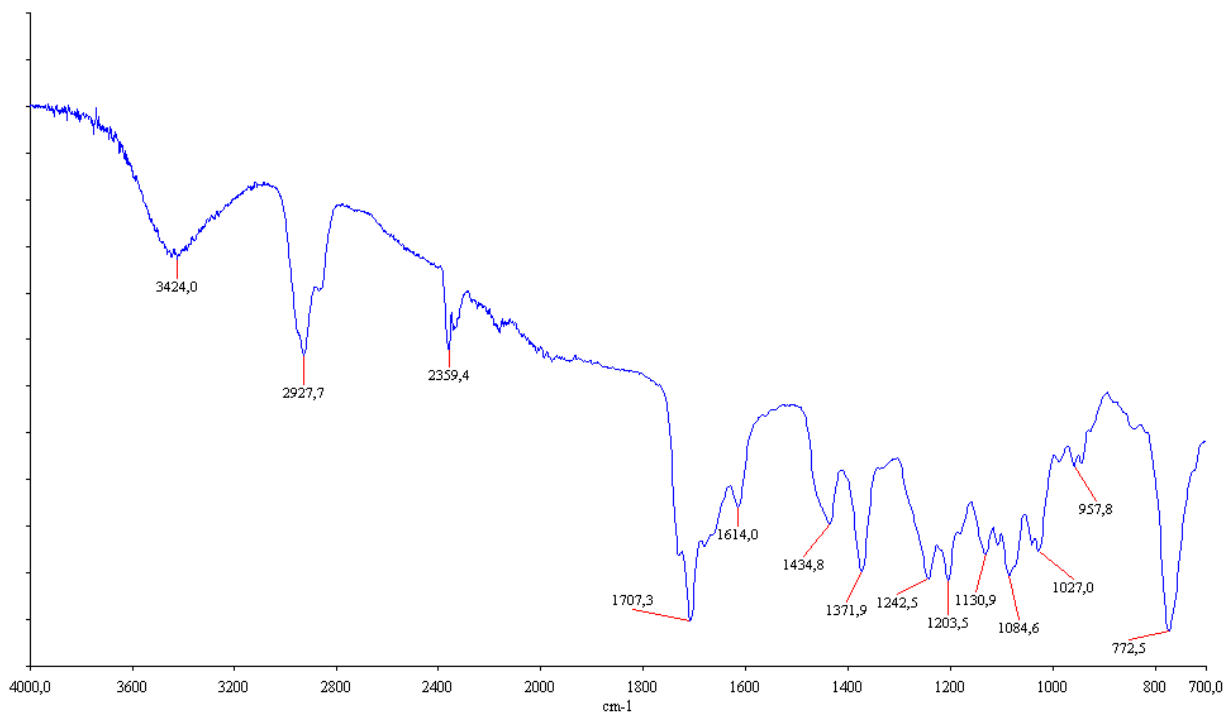

**Figure S46.** IR spectrum of isobisglaucumlide C (15)

**Table S7A.** Secondary metabolites of *P. longicirrum* isolated and identified in the current investigation in correlation with UPLC-HRMS data

| Molecular weight and <i>m/z</i> of prominent ion peaks | Chemical structure of putative metabolite                                            | Presence in Fraction/<br>RT in min                                                                         |
|--------------------------------------------------------|--------------------------------------------------------------------------------------|------------------------------------------------------------------------------------------------------------|
| M+: 492<br>(M+H: 493.39)                               | 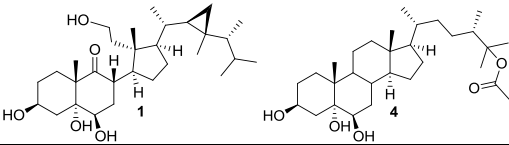   | VLC7/ 14.7                                                                                                 |
| M+: 450<br>(M+H: 451.32)                               |     | VLC7/ 15.0                                                                                                 |
| M+: 448<br>(M+H: 449.36)                               |     | VLC7/ 14.2                                                                                                 |
| M+: 332<br>(M+H: 333.23)                               |     | VLC8/ 14.2                                                                                                 |
| M+: 300<br>(M+H: 301.22,<br>M+Na: 323.20)              |   | VLC7/ 17.0<br>VLC8/ 17.0                                                                                   |
| M+: 344<br>(M+H: 345.21,<br>M+Na: 367.19)              |   | VLC6/ 15.4<br>VLC7/ 15.4                                                                                   |
| M+: 316<br>(M+H: 317.21)                               |   | VLC6/ 12.0, 12.7<br>VLC7/ 12.70                                                                            |
| M+: 302<br>(M+H: 303.23)                               |   | VLC7/ 16.1<br>VLC8/ 16.1                                                                                   |
| M+: 318<br>(M+H: 319.23,<br>M+Na: 341.21)              |   | VLC3/ 12.2<br>VLC4/ 12.2<br>VLC5/ 14.1<br>VLC6/ 14.3<br>VLC7/ 14.1, 14.3                                   |
| M+: 738<br>(M+H: 739.44,<br>M+Na: 761.42)              |  | VLC6/ 14.3*, 14.5, 14.9<br>VLC7 14.5, 14.9, 15.3*                                                          |
| M+: 362<br>(M+H: 363.22,<br>M+Na: 385.20)              |   | VLC3/ 13.2<br>VLC4/ 13.2<br>VLC5/ 13.0, 14.7<br>VLC6/ 13.0, 14.7,<br>16.3**<br>VLC7/ 13.0, 14.7,<br>16.3** |

|                          |                                                                                                                         |            |
|--------------------------|-------------------------------------------------------------------------------------------------------------------------|------------|
| M+: 376<br>(M+H: 377.23) | 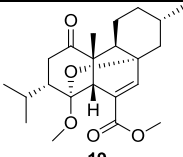 <p style="text-align: center;">19</p> | VLC6/ 15.1 |
|--------------------------|-------------------------------------------------------------------------------------------------------------------------|------------|

**Table S7B.** Secondary metabolites reported from various *Sarcophyton* spp., not isolated in the current study of *P. longicirrum*, but probably present according to UPLC-HRMS data

| Molecular weight<br>and <i>m/z</i> of ion peaks | Chemical structure                                                                   | Presence in Fraction/<br>RT in min     |
|-------------------------------------------------|--------------------------------------------------------------------------------------|----------------------------------------|
| M+: 316<br>(M+H: 317.21)                        | 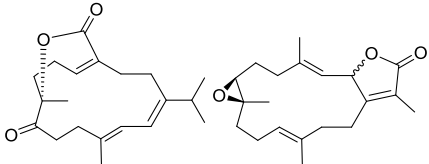    | VLC6/ 14.0*<br>VLC7/, 15.9*            |
| M+: 286<br>(M+H: 287.24)                        |     | VLC7/ 15.0<br>VLC8/ 15.0               |
| M+: 304<br>(M+H: 305.25)                        |   | VLC5/ 13.5<br>VLC8/ 14.4               |
| M+: 396<br>(M+H: 397.35)                        |   | VLC7/ 13.9, 15.7*<br>VLC8/ 13.9, 15.7* |
| M+: 414<br>(M+H: 415.36<br>M+Na: 437.34)        |  | VLC7/ 13.9                             |
| M+: 442<br>(M+H: 443.35)                        |   | VLC7/ 14.9                             |
| M+: 466<br>(M+H: 467.37)                        |   | VLC7/ 14.2                             |

|                          |                                                                                   |            |
|--------------------------|-----------------------------------------------------------------------------------|------------|
| M+: 486<br>(M+H: 487.36) | 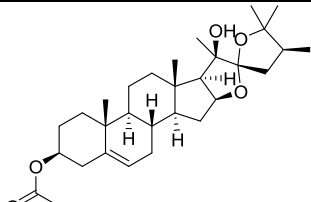 | VLC7/ 17.7 |
|--------------------------|-----------------------------------------------------------------------------------|------------|

Putative, not yet described biscebranoids containing **5** as dienophilic (western) part

|                          |                                                                                   |                          |
|--------------------------|-----------------------------------------------------------------------------------|--------------------------|
| M+: 710<br>(M+H: 711.39) | 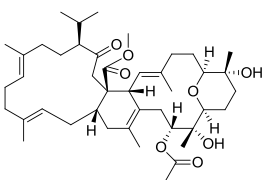 | VLC6/ 15.4<br>VLC7/ 15.4 |
| M+: 668<br>(M+H: 669.44) |  | VLC7/ 12.4               |

\* The presence of further isomers is very likely

\*\* 4-Oxochatancin occurs in equilibrium of three mesomeric forms

RT: 6,01 - 17,03

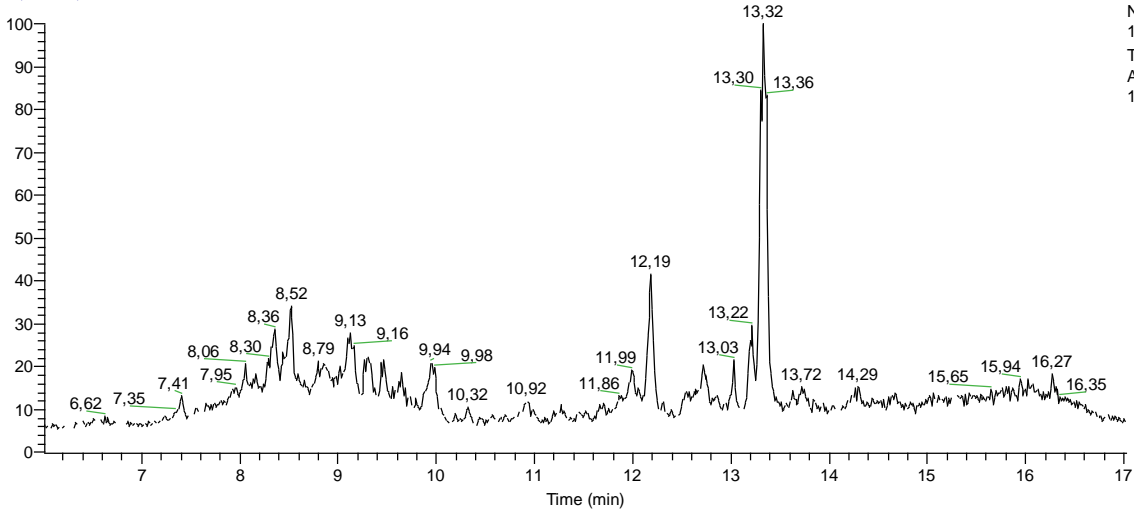

NL:  
1,53E8  
TIC MS  
AB\_21\_03\_  
13\_K1

AB\_21\_03\_13\_K1 #612-1102 RT: 7,81-13,86 AV: 491 NL: 8,27E5  
T: FTMS + p ESI Full ms [150,00-2000,00]

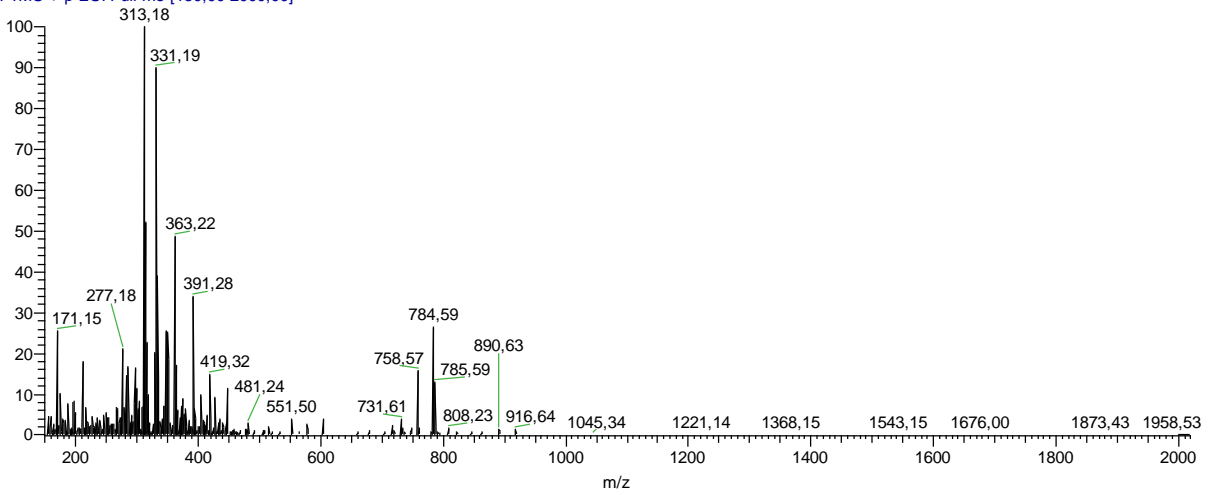

Figure S47. UPLC-HRMS chromatogram of VLC3

RT: 7,25 - 15,47

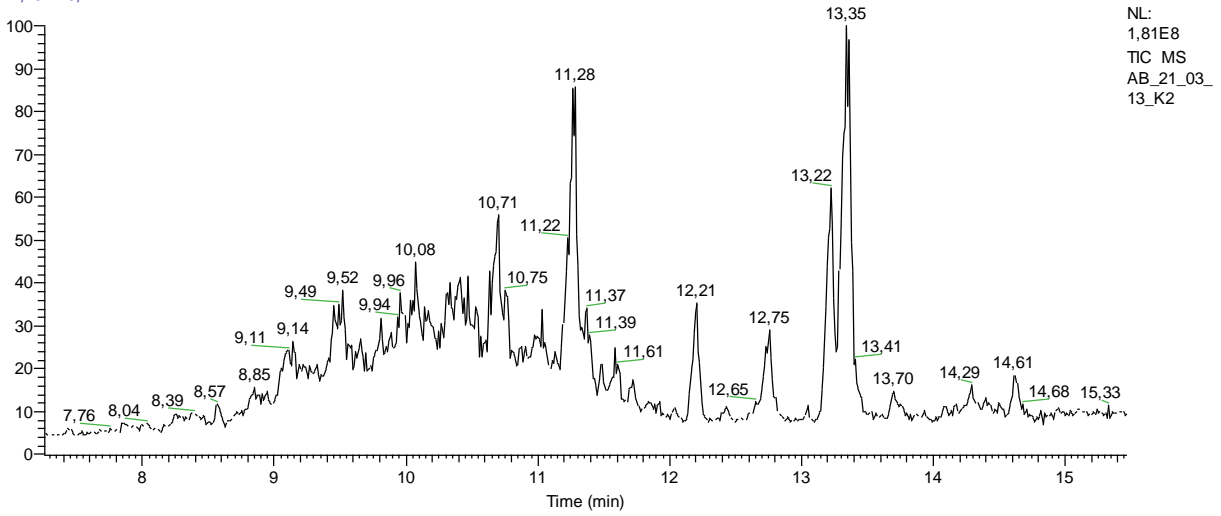

AB\_21\_03\_13\_K2 #669-1126 RT: 8,54-13,85 AV: 458 NL: 1,53E6  
T: FTMS + p ESI Full ms [150,00-2000,00]

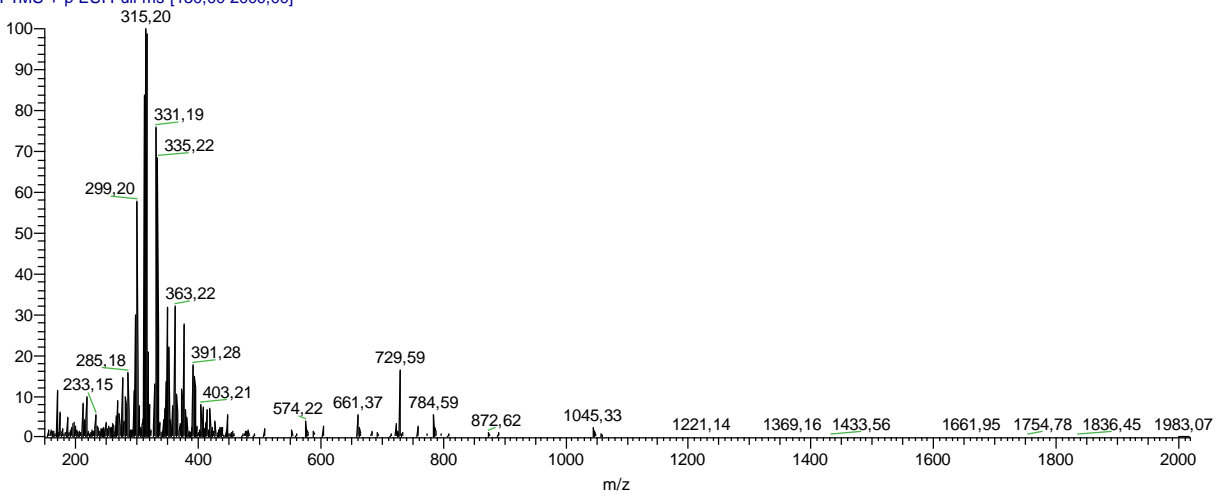

Figure S48. UPLC-HRMS chromatogram of VLC4

RT: 8,97 - 15,15

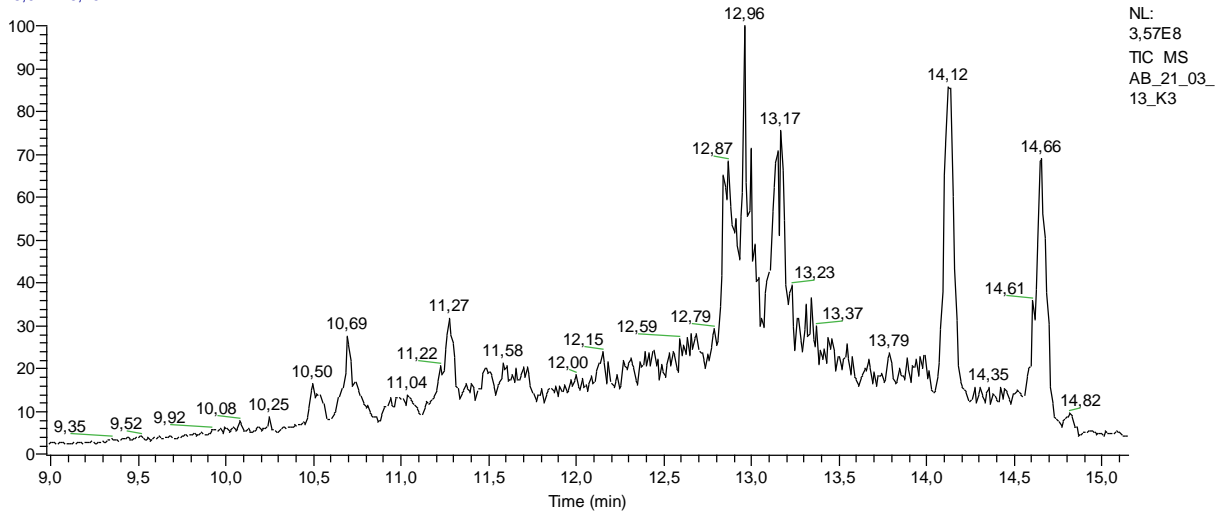

AB\_21\_03\_13\_K3 #820-1231 RT: 10,43-14,84 AV: 412 NL: 2,68E6

T: FTMS + p ESI Full ms [150,00-2000,00]

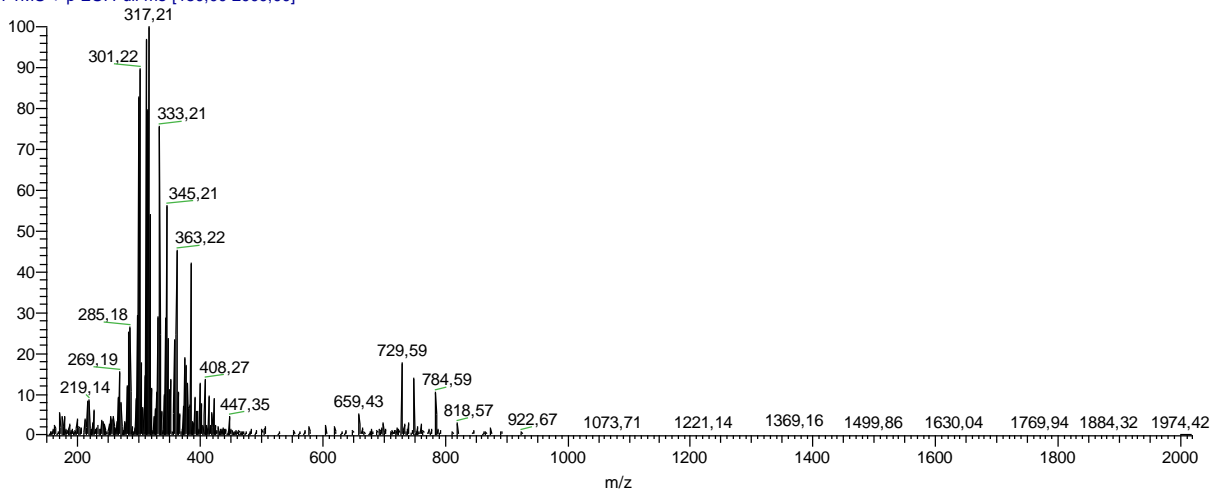

Figure S49. UPLC-HRMS chromatogram of VLC5

RT: 9,93 - 17,99

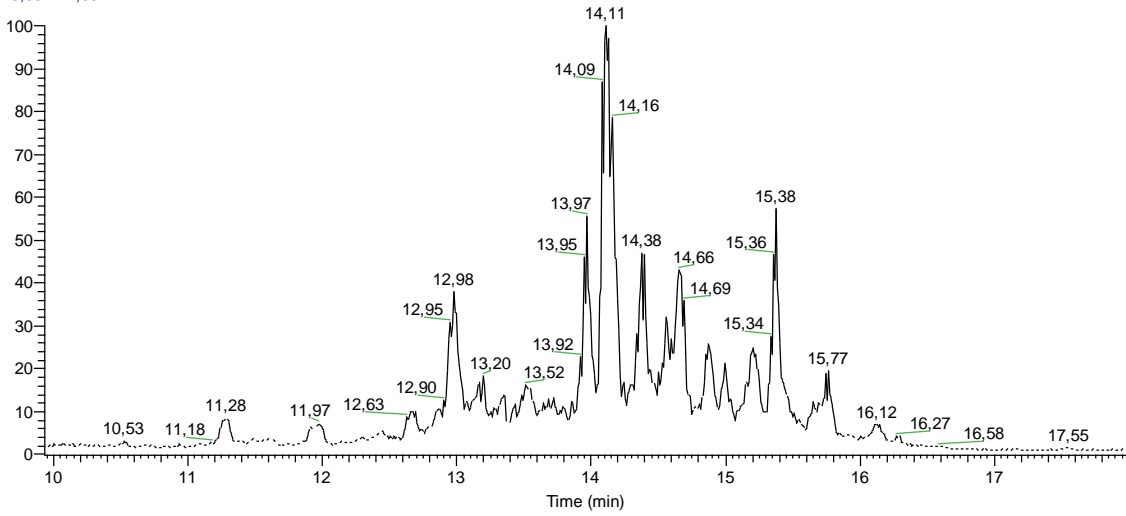

NL:  
7,02E8  
TIC MS  
AB\_21\_03\_  
13\_K4

AB\_21\_03\_13\_K4 #992-1318 RT: 12,60-16,05 AV: 327 NL: 6,54E6  
T: FTMS + p ESI Full ms [150,00-2000,00]

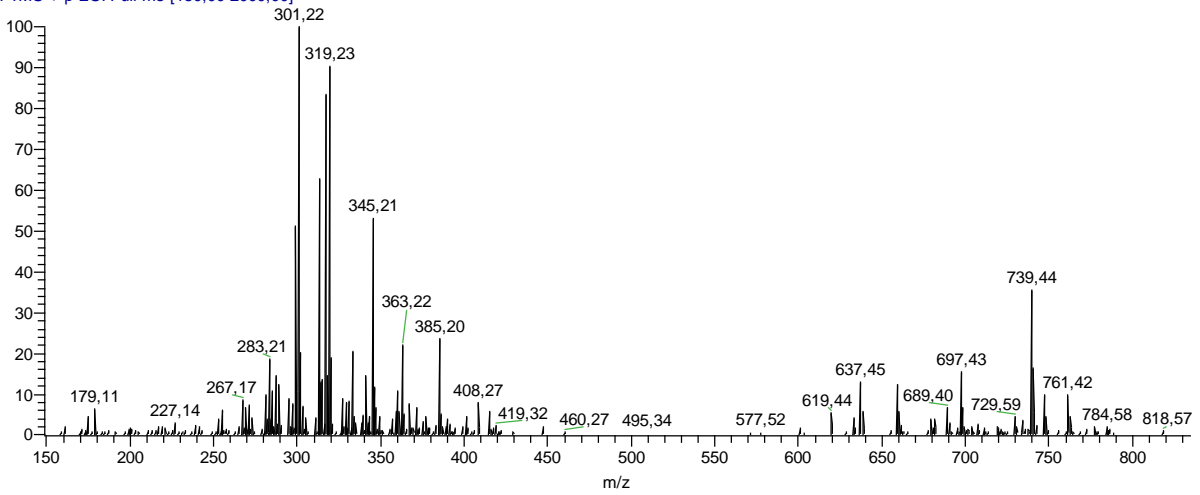

Figure S50. UPLC-HRMS chromatogram of VLC6



RT: 9,88 - 18,56

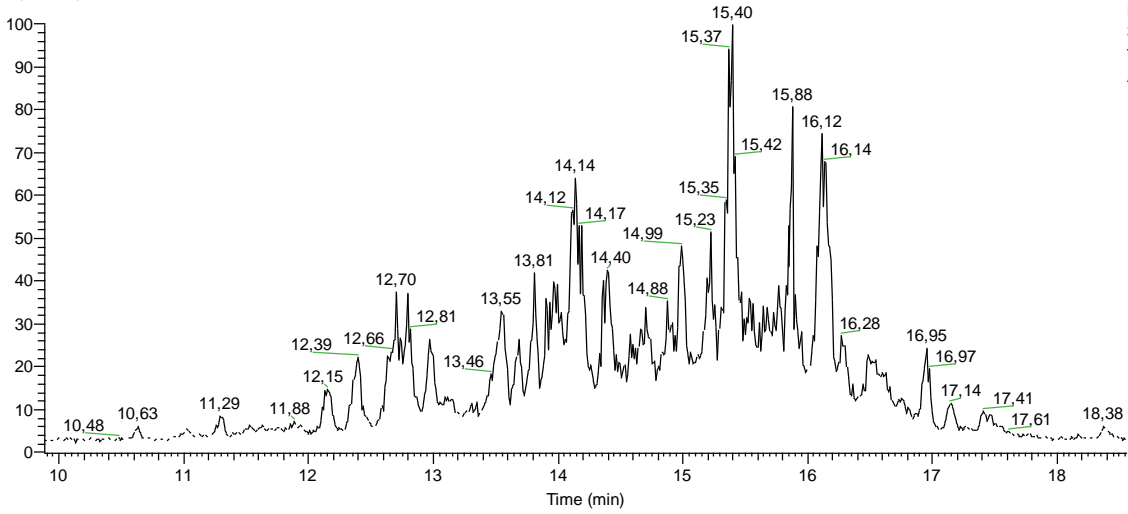

NL:  
3,33E8  
TIC MS  
AB\_21\_03\_  
13\_K5

AB\_21\_03\_13\_K5 #941-1425 RT: 12,01-17,39 AV: 485 NL: 2,87E6  
T: FTMS + p ESI Full ms [150,00-2000,00]

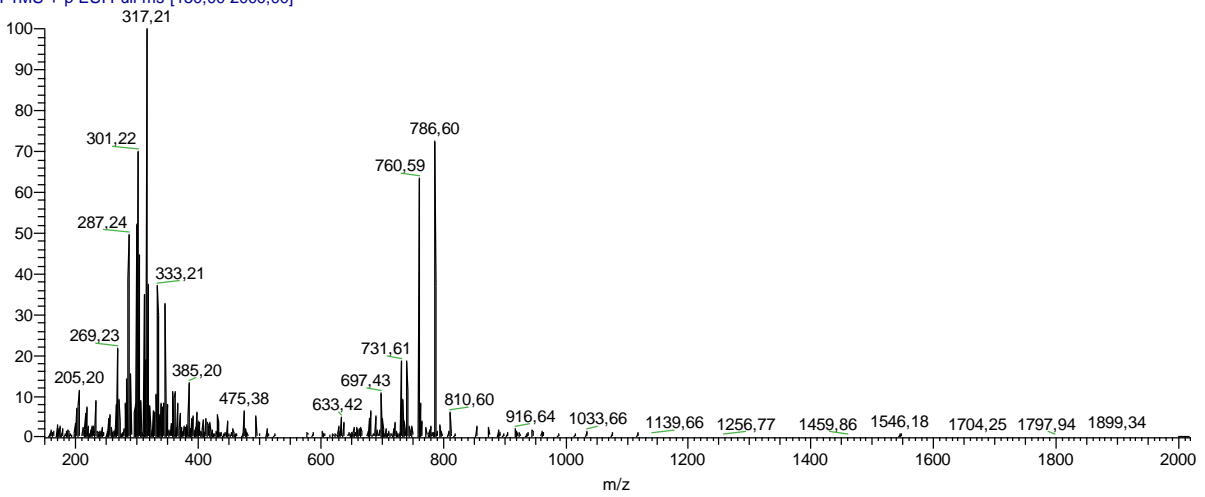

Figure S51. UPLC-HRMS chromatogram of VLC7

RT: 10,01 - 20,33

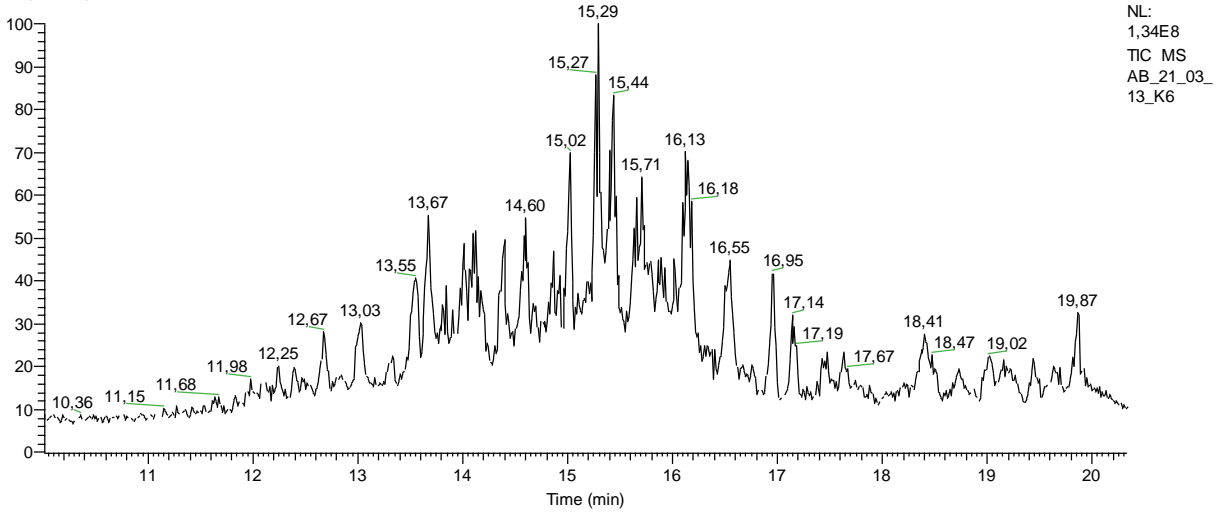

AB\_21\_03\_13\_K6 #948-1416 RT: 12,10-17,64 AV: 469 NL: 2,23E6  
T: FTMS + p ESI Full ms [150,00-2000,00]

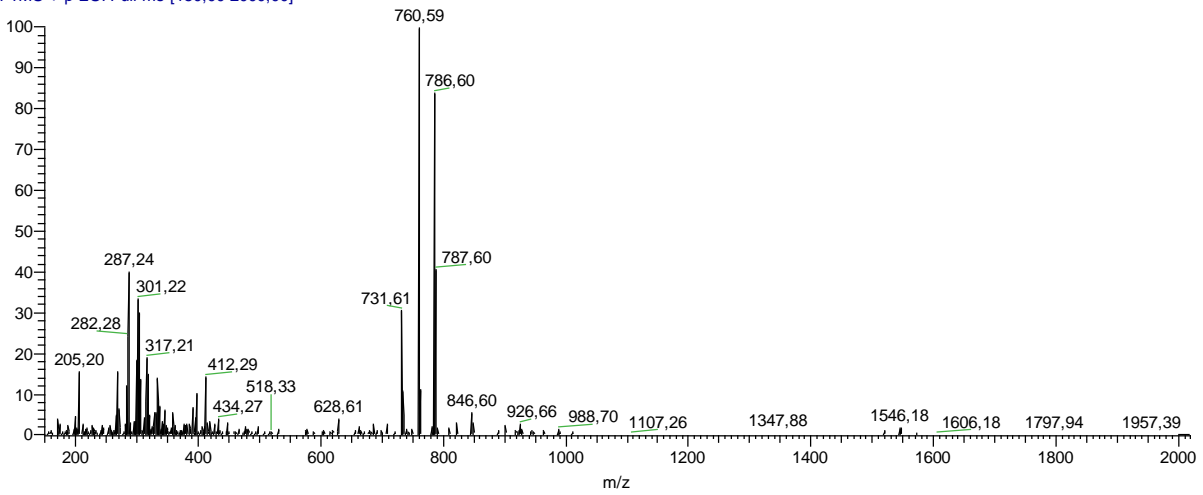

Figure S52. UPLC-HRMS chromatogram of VLC8

RT: 0,00 - 22,02

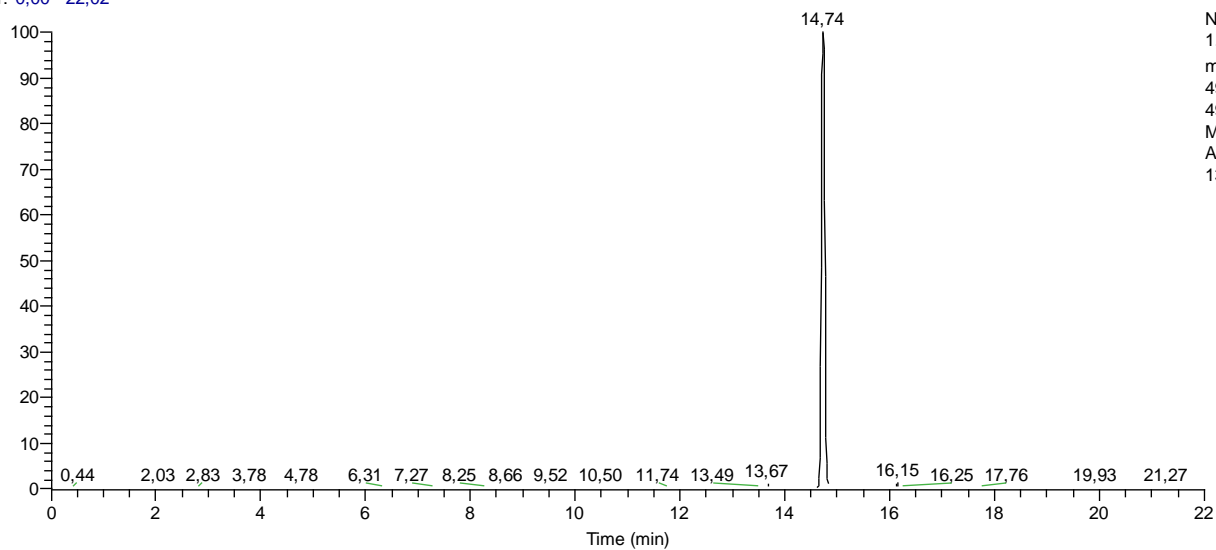

NL:  
1,02E7  
m/z=  
493,00-  
494,00  
MS  
AB\_21\_03\_  
13\_K5

AB\_21\_03\_13\_K5 #1185 RT: 14,74 AV: 1 NL: 1,16E7  
T: FTMS + p ESI Full ms [150,00-2000,00]

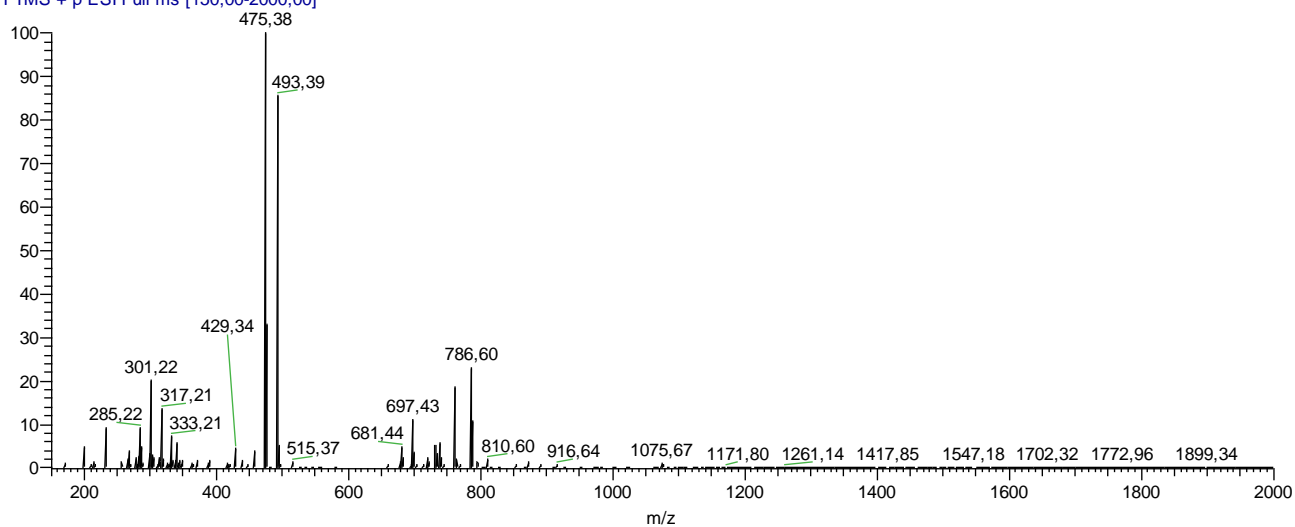

**Figure S53.** Abundance of 3 $\beta$ ,5 $\alpha$ ,6 $\beta$ -trihydroxy-9-oxo-9,11-secogorgostan-11-ol (**1**) ( $m/z$  493.39 M+H) in VLC 7

RT: 0,00 - 22,02

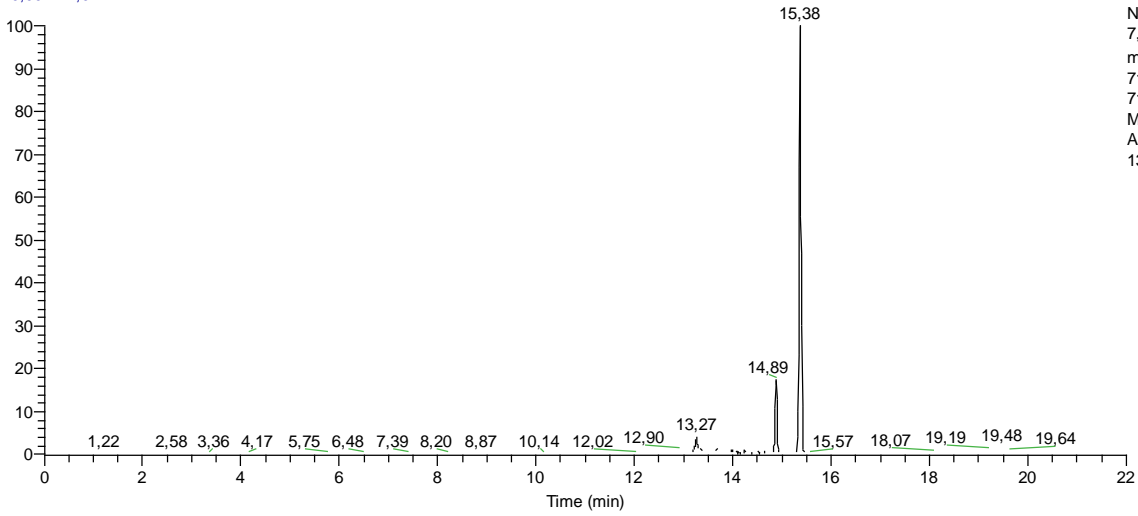NL:  
7,19E6  
m/z=  
711,00-  
712,00  
MS  
AB\_21\_03\_  
13\_K4AB\_21\_03\_13\_K4 #1255 RT: 15,34 AV: 1 NL: 6,84E6  
T: FTMS + p ESI Full ms [150,00-2000,00]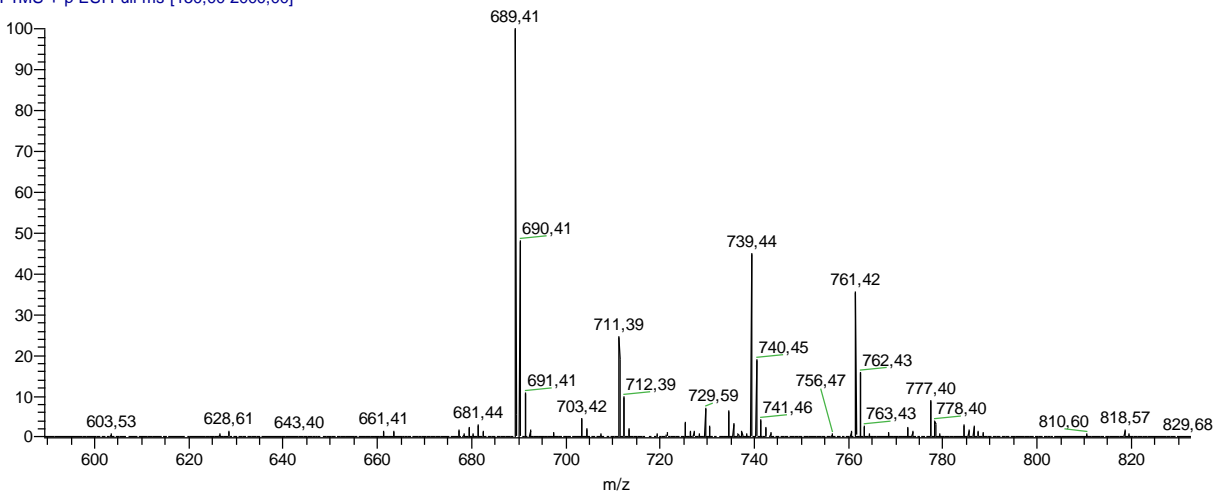Figure S54. Abundance of  $m/z$  value of 711.39 in the fraction VLC 6

RT: 0,00 - 22,02

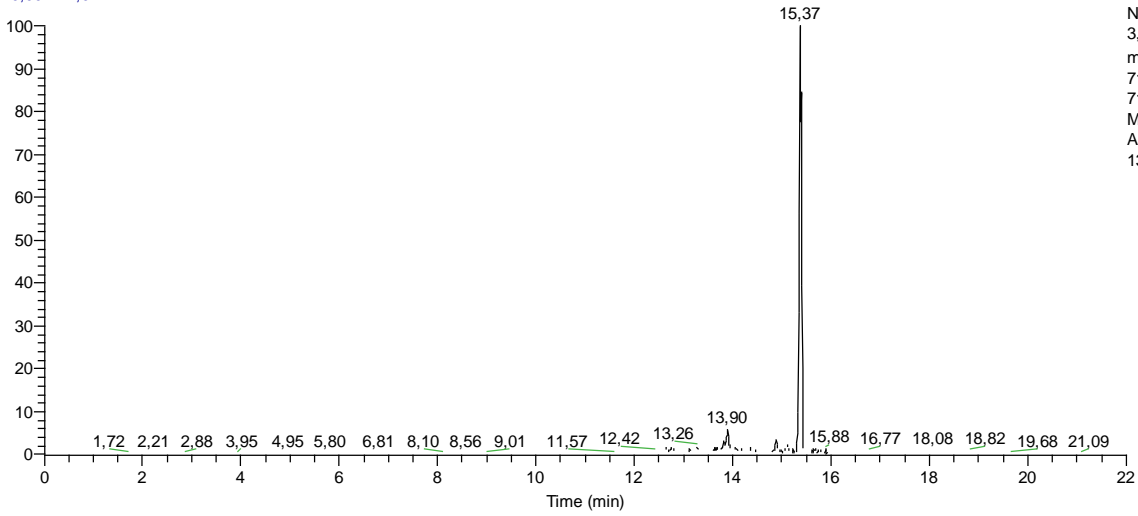

NL:  
3,75E6  
m/z=  
711,00-  
712,00  
MS  
AB\_21\_03\_  
13\_K5

AB\_21\_03\_13\_K5 #1247 RT: 15.39 AV: 1 NL: 8,17E6  
T: FTMS + p ESI Full ms [150,00-2000,00]

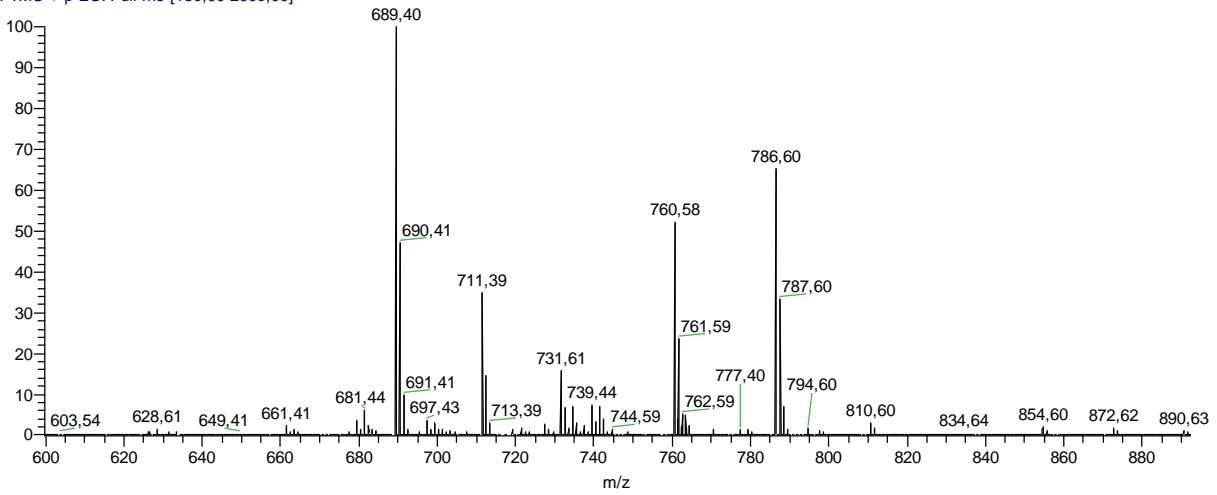

Figure S55. Abundance of  $m/z$  value of 711.39 in the fraction VLC 7

RT: 0,00 - 22,02

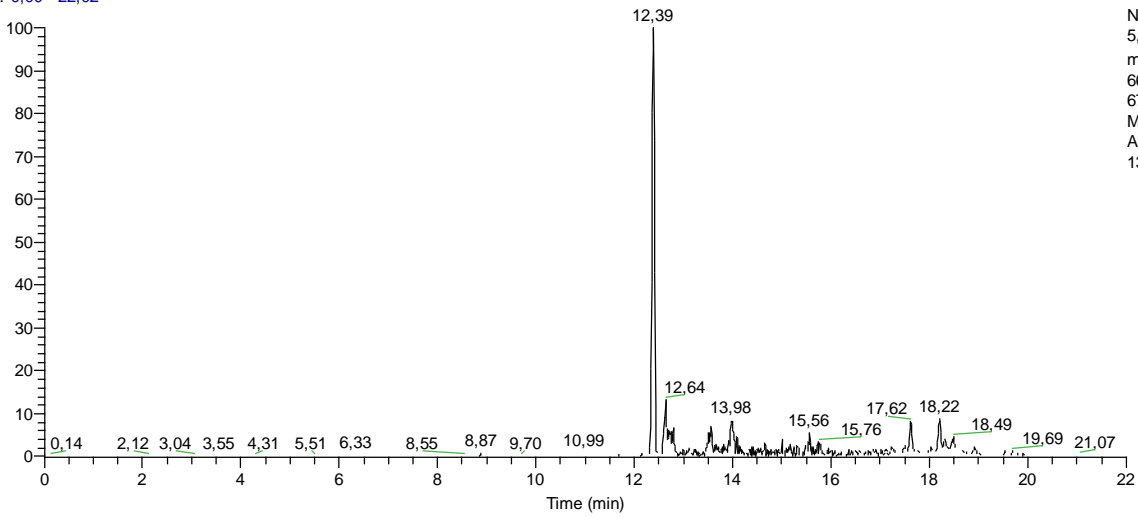

NL:  
5,49E5  
m/z=  
669,00-  
670,00  
MS  
AB\_21\_03\_  
13\_K5

AB\_21\_03\_13\_K5 #971 RT: 12,37 AV: 1 NL: 4,37E5  
T: FTMS + p ESI Full ms [150,00-2000,00]

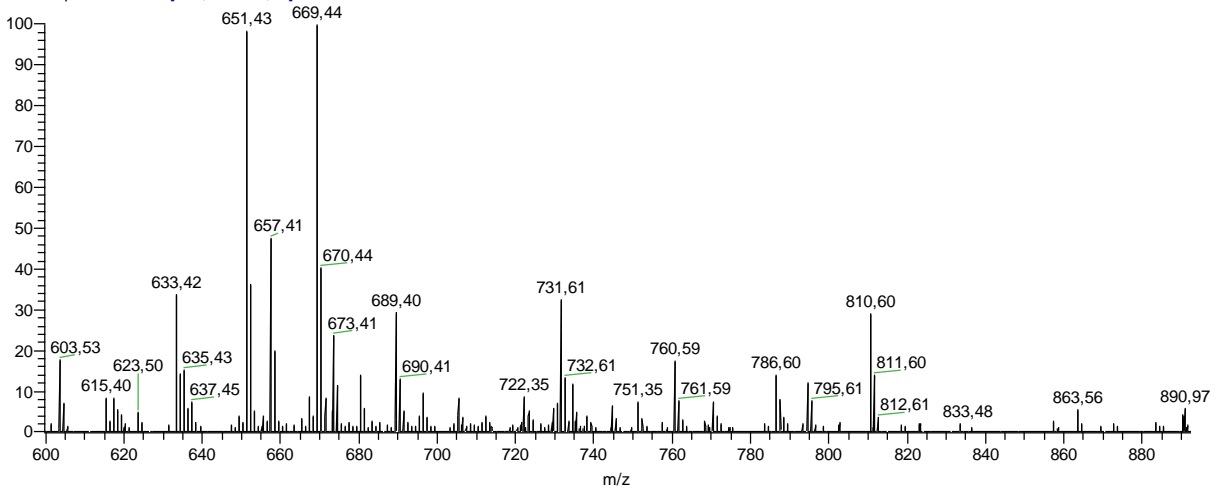

Figure S56. Abundance of  $m/z$  value of 669.44 in the fraction VLC 7

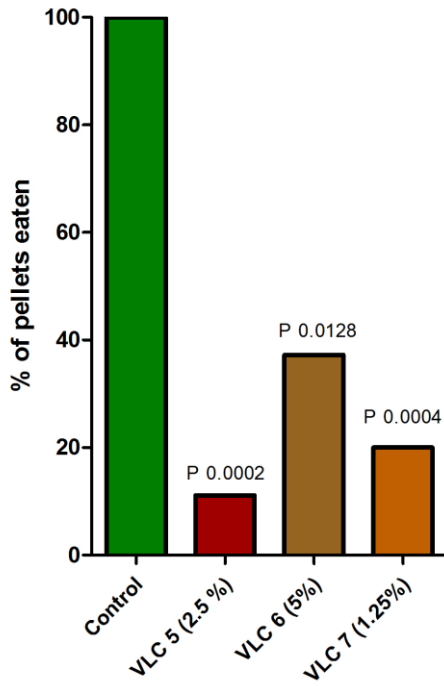

**Figure S57.** Preliminary results of feeding deterrence assay.

Effect of fractions obtained by vacuum liquid chromatography (VLC 5, 6 and 7) on predation by *Canthigaster solandri* ( $n$  8–11) at different concentrations (% of pellet dry mass). Fishers exact test was used, P values indicate a significant feeding deterrence (all  $P < 0.05$ ).
